# Supplementary material for: The myocardium utilizes a platelet-derived growth factor receptor alpha (Pdgfra)–phosphoinositide 3-kinase (PI3K) signaling cascade to steer toward the midline during zebrafish heart tube formation
Source: eLife. 2023 Nov 3;12:e85930. doi: 10.7554/eLife.85930 (PMC10651176; doi:10.7554/eLife.85930)
Supplement: Figure 1—figure supplement 1—source data 1. [file elife-85930-fig1-figsupp1-data1.xlsx]

## Sheet: Fig 1- Fig Suppl. 1A-1P_average
Figure 1 - Figure Supplement 1A-1P
Inhibitor	Dose	Total number of embryos	Average cardiac ring %	Cardiac ring SEM	Average posterior fusion %	Posterior fusion SEM	Average cardia bifida %	Cardia bifida SEM		p-values: ONE-WAY ANOVA
LY294002	DMSO	40	100	0	0	0	0	0		DMSO-10uM	1
	10uM	40	100	0	0	0	0	0		DMSO-15uM	0.00054
	15uM	30	43.33	17	56.67	16.5	0	0		DMSO-20uM	0.00028
	20uM	31	25.8	13.33	35.5	4.54	38.7	8.9		DMSO-25uM	9e-05
	25uM	31	12.9	6.66	25.8	4.15	61.3	9.07
Dactolisib	DMSO	38	100	0	0	0	0	0		DMSO-20uM	0.0009
	20uM	34	58.8235	8.33	23.5294	11.82	17.6471	20.09		DMSO-40uM	0.00049
	40uM	39	41.0256	8.33	15.3846	16.67	43.5897	22.04
										DMSO-20uM	0.0019
Pictilisib	DMSO	37	100	0	0	0	0	0		DMSO-50uM	0.00036
	20uM	39	71.7949	4.81	28.2051	4.81	0	0
	50uM	38	50	7.74	42.1053	8.33	7.89474	0.68
dnPI3K	Uninjected	73	100	0	0	0	0	0		Uninjected - 300pg	0.9942
	300pg	55	98	3.2	2	2.7	0	0		Uninejcted - 450pg	0.0029
	450pg	61	83	6.8	17	4.3	0	0		Uninjected - 600pg	0.00023
	600pg	57	75	5.9	21.5	4.9	3.5	7.6		Uninjected - 750pg	2.87e-05
	750pg	52	69	3.8	25	9.5	6	5.8

## Sheet: Fig 1- Fig Suppl. 1A-1P_raw
Figure 1 - Figure Supplement 1A-1P
Inhibitor	Dose	Replicate #	No. of embryos	Cardiac ring %	Posterior fusion %	Cardia bifida %
LY294002	DMSO	1	10	100	0	0
	DMSO	2	15	100	0	0
	DMSO	3	12	100	0	0
	10uM	1	10	100	0	0
	10uM	2	15	100	0	0
	10uM	3	15	100	0	0
	15uM	1	10	42	58	0
	15uM	2	10	26	73	0
	15uM	3	10	60	40	0
	20uM	1	9	0	45	55
	20uM	2	10	40	30	30
	20uM	3	12	40	33.33	26.67
	25uM	1	9	0	22	78
	25uM	2	10	20	20	60
	25uM	3	12	20	33.33	46.67
Dactolisib	DMSO	1	14	100	0	0
	DMSO	2	12	100	0	0
	DMSO	3	12	100	0	0
	20uM	1	10	50	10	40
	20uM	2	12	66.67	33.33	0
	20uM	3	12	58.33	22.77	18.89
	40uM	1	15	33.33	0	66.67
	40uM	2	12	41.67	33.33	25
	40uM	3	12	50	16.67	33.33
Pictilisib	DMSO	1	13	100	0	0
	DMSO	2	12	100	0	0
	DMSO	3	12	100	0	0
	20uM	1	15	66.67	33.33	0
	20uM	2	12	75	25	0
	20uM	3	12	75	25	0
	50uM	1	14	42.8571	50	7.14286
	50uM	2	12	50	41.67	8.33
	50uM	3	12	58.33	33.33	8.33
dnPI3K	Uninjected	1	39	100	0	0
	Uninjected	2	18	100	0	0
	Uninjected	3	16	100	0	0
	300pg	1	25	96	4	0
	300pg	2	14	100	0	0
	300pg	3	16	100	0	0
	450pg	1	28	89	11	0
	450pg	2	15	80	20	0
	450pg	3	18	77	23	0
	600pg	1	27	74	18	8
	600pg	2	13	69	31	0
	600pg	3	17	83	17	0
	750pg	1	24	70	21	9
	750pg	2	13	69	31	0
	750pg	3	15	67	26	7

## Sheet: Fig 1- Fig Suppl. 1Q_average
Figure 1 - Figure Supplement 1Q
Treatment	Total number of replicates	Average pAkt/Akt	SEM		p-values: ONE-WAY ANOVA
DMSO	3	1	0		DMSO-20uM Dactolisib	1.29e-05
20uM Dactolisib	3	0.394808	0.038		DMSO-40uM Dactolisib	2.7e-06
40uM Dactolisib	3	0.220217	0.032

## Sheet: Fig 1- Fig Suppl. 1Q_raw
Figure 1 - Figure Supplement 1Q
Treatment	Replicate #	pAkt/Akt
DMSO	1	1
DMSO	2	1
DMSO	3	1
20uM Dactolisib	1	0.470077
20uM Dactolisib	2	0.353618
20uM Dactolisib	3	0.360728
40uM Dactolisib	1	0.24071
40uM Dactolisib	2	0.261688
40uM Dactolisib	3	0.158252

## Sheet: Fig 1- Fig Suppl. 1R_average
Figure 1 - Figure Supplement 1R
Treatment	Total number of replicates	Average pAkt/Akt	SEM		p-values: ONE-WAY ANOVA
DMSO	3	1	0		DMSO-20uM Pictilisib	1.3e-05
20uM Pictilisib	3	0.484436	0.04		DMSO-50uM Pictilisib	2.1e-06
50uM Pictilisib	3	0.299451	0.009

## Sheet: Fig 1- Fig Suppl. 1R_raw
Figure 1 - Figure Supplement 1R
Treatment	Replicate #	pAkt/Akt
DMSO	1	1
DMSO	2	1
DMSO	3	1
20uM Pictilisib	1	0.417102
20uM Pictilisib	2	0.558615
20uM Pictilisib	3	0.477591
40uM Pictilisib	1	0.307165
40uM Pictilisib	2	0.281693
40uM Pictilisib	3	0.309496

## Sheet: Fig 1- Fig Suppl. 1S_average
Figure 1 - Figure Supplement 1S
Treatment	Total number of replicates	Average pAkt/Akt	SEM		p-values: ONE-WAY ANOVA
Uninjected	3	1	0		Uninjected- 300pg dnPI3K	0.876848
300pg dnPI3K	3	1.15204	0.25		Uninjected- 450pg dnPI3K	0.0344529
450pg dnPI3K	3	0.552602	0.07		Uninjected- 600pg dnPI3K	0.02915
600pg dnPI3K	3	0.408459	0.022		Uninjected- 750pg dnPI3K	0.0092951
750pg dnPI3K	3	0.2867	0.012

## Sheet: Fig 1- Fig Suppl. 1S_raw
Figure 1 - Figure Supplement 1S
Treatment	Replicate #	pAkt/Akt
Uninjected	1	1
Uninjected	2	1
Uninjected	3	1
300pg dnPI3K	1	1.6436
300pg dnPI3K	2	0.941045
300pg dnPI3K	3	0.871477
450pg dnPI3K	1	0.605389
450pg dnPI3K	2	0.634755
450pg dnPI3K	3	0.417661
600pg dnPI3K	1	0.452758
600pg dnPI3K	2	0.387862
600pg dnPI3K	3	0.384758
750pg dnPI3K	1	0.284388
750pg dnPI3K	2	0.308645
750pg dnPI3K	3	0.267066
