# Supplementary material for: The myocardium utilizes a platelet-derived growth factor receptor alpha (Pdgfra)–phosphoinositide 3-kinase (PI3K) signaling cascade to steer toward the midline during zebrafish heart tube formation
Source: eLife. 2023 Nov 3;12:e85930. doi: 10.7554/eLife.85930 (PMC10651176; doi:10.7554/eLife.85930)
Supplement: Figure 1—figure supplement 2—source data 1. [file elife-85930-fig1-figsupp2-data1.xlsx]

## Sheet: Fig 1- Fig Suppl. 2C_average
Figure 1 - Figure supplement 2C
Treatment	Total number of embryos	Average embryonic length	25th percentile	Median	75th percentile			p-values: Two sample t-test
DMSO	40	1.34075	1.3	1.345	1.38			0.0004527
20uM LY	40	0.9655	0.9225	0.96	1.01

## Sheet: Fig 1- Fig Suppl. 2C_raw
Figure 1 - Figure supplement 2C
Treatment	Replicate #	Embryonic length
DMSO	1	1.4
DMSO	1	1.32
DMSO	1	1.29
DMSO	1	1.38
DMSO	1	1.42
DMSO	1	1.36
DMSO	1	1.41
DMSO	1	1.27
DMSO	1	1.24
DMSO	1	1.32
DMSO	1	1.38
DMSO	1	1.3
DMSO	1	1.41
DMSO	1	1.35
DMSO	1	1.39
DMSO	2	1.3
DMSO	2	1.31
DMSO	2	1.38
DMSO	2	1.4
DMSO	2	1.32
DMSO	2	1.36
DMSO	2	1.35
DMSO	2	1.42
DMSO	2	1.29
DMSO	2	1.31
DMSO	2	1.37
DMSO	2	1.38
DMSO	3	1.43
DMSO	3	1.32
DMSO	3	1.3
DMSO	3	1.34
DMSO	3	1.29
DMSO	3	1.29
DMSO	3	1.28
DMSO	3	1.25
DMSO	3	1.24
DMSO	3	1.36
DMSO	3	1.33
DMSO	3	1.38
DMSO	3	1.39
20uM LY	1	1
20uM LY	1	1.02
20uM LY	1	0.98
20uM LY	1	0.9
20uM LY	1	0.97
20uM LY	1	1.12
20uM LY	1	1.02
20uM LY	1	1.07
20uM LY	1	0.95
20uM LY	1	0.96
20uM LY	1	1
20uM LY	1	1.02
20uM LY	1	1.01
20uM LY	1	1.09
20uM LY	1	0.87
20uM LY	2	0.91
20uM LY	2	0.93
20uM LY	2	0.92
20uM LY	2	0.95
20uM LY	2	0.96
20uM LY	2	0.87
20uM LY	2	0.85
20uM LY	2	0.97
20uM LY	2	1
20uM LY	2	1.01
20uM LY	2	1.02
20uM LY	2	0.86
20uM LY	3	0.85
20uM LY	3	0.94
20uM LY	3	0.95
20uM LY	3	0.98
20uM LY	3	0.9
20uM LY	3	0.96
20uM LY	3	0.93
20uM LY	3	0.92
20uM LY	3	1.03
20uM LY	3	1
20uM LY	3	0.96
20uM LY	3	0.94
20uM LY	3	1.03

## Sheet: Fig 1- Fig Suppl. 2F_average
Figure 1 - Figure supplement 2F
Treatment	Total number of embryos	Average no. of somites	25th percentile	Median	75th percentile			p-values: Two sample t-test
DMSO	39	20.3222	20	20	21			7.624e-05
20uM LY	42	16.0476	15	16	17

## Sheet: Fig 1- Fig Suppl. 2F_raw
Figure 1 - Figure supplement 2F
Treatment	Replicate #	No. of somites
DMSO	1	20
DMSO	1	21
DMSO	1	20
DMSO	1	20
DMSO	1	21
DMSO	1	20
DMSO	1	21
DMSO	1	20
DMSO	1	20
DMSO	1	20
DMSO	1	21
DMSO	1	22
DMSO	1	21
DMSO	1	20
DMSO	1	20
DMSO	2	20
DMSO	2	20
DMSO	2	21
DMSO	2	20
DMSO	2	20
DMSO	2	21
DMSO	2	20
DMSO	2	20
DMSO	2	21
DMSO	2	20
DMSO	2	20
DMSO	2	20
DMSO	3	20
DMSO	3	20
DMSO	3	20
DMSO	3	21
DMSO	3	20
DMSO	3	20
DMSO	3	21
DMSO	3	20
DMSO	3	20
DMSO	3	21
DMSO	3	20
DMSO	3	20
20uM LY	1	15
20uM LY	1	15
20uM LY	1	16
20uM LY	1	17
20uM LY	1	16
20uM LY	1	15
20uM LY	1	17
20uM LY	1	16
20uM LY	1	16
20uM LY	1	17
20uM LY	1	17
20uM LY	1	16
20uM LY	1	15
20uM LY	1	16
20uM LY	1	16
20uM LY	2	16
20uM LY	2	16
20uM LY	2	17
20uM LY	2	15
20uM LY	2	17
20uM LY	2	15
20uM LY	2	16
20uM LY	2	17
20uM LY	2	15
20uM LY	2	17
20uM LY	2	16
20uM LY	2	17
20uM LY	2	15
20uM LY	2	16
20uM LY	3	16
20uM LY	3	17
20uM LY	3	15
20uM LY	3	17
20uM LY	3	16
20uM LY	3	17
20uM LY	3	15
20uM LY	3	16
20uM LY	3	17
20uM LY	3	16
20uM LY	3	15
20uM LY	3	17
20uM LY	3	15

## Sheet: Fig 1- Fig Suppl. 2I_average
Figure 1 - Figure supplement 2I
Treatment	Total number of embryos	Cardiac fusion defect %	Average cardiac fusion defect %	SEM				p-values: Two sample t-test
DMSO_1st replicate	15	0	DMSO : 0	0				4.56e-05
DMSO_2nd replicate	15	0	20uM LY : 100	0
DMSO_3rd replicate	15	0
20uM LY_1st replicate	15	100
20uM LY_2nd replicate	15	100
20uM LY_3rd replicate	15	100

## Sheet: Fig 1- Fig Suppl. 2I_raw
Figure 1 - Figure supplement 2I
Treatment	Total number of embryos	Cardiac fusion defect %
DMSO_1st replicate	15	0
DMSO_2nd replicate	15	0
DMSO_3rd replicate	15	0
20uM LY_1st replicate	15	100
20uM LY_2nd replicate	15	100
20uM LY_3rd replicate	15	100
