# Supplementary material for: The myocardium utilizes a platelet-derived growth factor receptor alpha (Pdgfra)–phosphoinositide 3-kinase (PI3K) signaling cascade to steer toward the midline during zebrafish heart tube formation
Source: eLife. 2023 Nov 3;12:e85930. doi: 10.7554/eLife.85930 (PMC10651176; doi:10.7554/eLife.85930)
Supplement: Figure 1—figure supplement 3—source data 1. [file elife-85930-fig1-figsupp3-data1.xlsx]

## Sheet: Fig 1- Fig Suppl. 3A-3F_average
Figure 1 - Figure supplement 3A-3F
Treatment	Total number of embryos	Average Cardiac ring %	Cardiac ring SEM	Average Posterior fusion %	Posterior fusion SEM	Average Cardia bifida %	Cardia bifida SEM
DMSO	45	100	0	0	0	0	0
1uM Rapamycin	46	100	0	0	0	0	0
5uM Rapamycin	45	100	0	0	0	0	0
10uM Rapamycin	45	100	0	0	0	0	0
20uM Rapamycin	44	100	0	0	0	0	0

## Sheet: Fig 1- Fig Suppl. 3A-3F_raw
Figure 1 - Figure supplement 3A-3F
Treatment	Replicate #	No. of embryos	Cardiac ring %	Posterior fusion %	Cardia bifida %
DMSO	1	15	100	0	0
DMSO	2	15	100	0	0
DMSO	3	15	100	0	0
1uM Rapamycin	1	16	100	0	0
1uM Rapamycin	2	15	100	0	0
1uM Rapamycin	3	15	100	0	0
5uM Rapamycin	1	15	100	0	0
5uM Rapamycin	2	15	100	0	0
5uM Rapamycin	3	15	100	0	0
10uM Rapamycin	1	15	100	0	0
10uM Rapamycin	2	15	100	0	0
10uM Rapamycin	3	15	100	0	0
20uM Rapamycin	1	14	100	0	0
20uM Rapamycin	2	15	100	0	0
20uM Rapamycin	3	15	100	0	0

## Sheet: Fig 1- Fig Suppl. 3G_average
Figure 1 - Figure supplement 3G
Treatment	Total number of replicates	Average pAkt/Akt	SEM		p-values: ONE-WAY ANOVA
DMSO	3	1	0		DMSO-1uM Rapamycin	0.588449
1uM Rapamycin	3	0.785676	0.16		DMSO-5uM Rapamycin	0.0405406
5uM Rapamycin	3	0.508214	0.14		DMSO- 10uM Rapamycin	0.0056131
10uM Rapamycin	3	0.321195	0.075		DMSO-20uM Rapamycin	0.0006673
20uM Rapamycin	3	0.0974018	0.033

## Sheet: Fig 1- Fig Suppl. 3G_raw
Figure 1 - Figure supplement 3G
Treatment	Replicate #	pAkt/Akt
DMSO	1	1
DMSO	2	1
DMSO	3	1
1uM Rapamycin	1	0.48615
1uM Rapamycin	2	0.844143
1uM Rapamycin	3	1.02673
5uM Rapamycin	1	0.237556
5uM Rapamycin	2	0.703228
5uM Rapamycin	3	0.583858
10uM Rapamycin	1	0.174756
10uM Rapamycin	2	0.364551
10uM Rapamycin	3	0.424277
20uM Rapamycin	1	0.0327113
20uM Rapamycin	2	0.146727
20uM Rapamycin	3	0.112767
