# Supplementary material for: The myocardium utilizes a platelet-derived growth factor receptor alpha (Pdgfra)–phosphoinositide 3-kinase (PI3K) signaling cascade to steer toward the midline during zebrafish heart tube formation
Source: eLife. 2023 Nov 3;12:e85930. doi: 10.7554/eLife.85930 (PMC10651176; doi:10.7554/eLife.85930)
Supplement: Figure 1—figure supplement 4—source data 1. [file elife-85930-fig1-figsupp4-data1.xlsx]

## Sheet: Fig 1- Fig Suppl. 4I_average
Figure 1 - Figure supplement 4I
Treatment	Total number of embryos	Average number of cardiomyocytes	25th percentile	Median	75th percentile			p-values: Two sample t-test
DMSO	21	204.86	198	205	211			0.2119
20uM LY	25	202.16	198	203	208.5

## Sheet: Fig 1- Fig Suppl. 4I_raw
Figure 1 - Figure supplement 4I
Treatment	Replicate #	No. of cardiomyocytes
DMSO	1	201
DMSO	1	198
DMSO	1	205
DMSO	1	202
DMSO	1	206
DMSO	1	211
DMSO	2	214
DMSO	2	208
DMSO	2	197
DMSO	2	204
DMSO	2	208
DMSO	3	204
DMSO	3	199
DMSO	3	206
DMSO	3	215
DMSO	3	212
DMSO	3	197
DMSO	4	198
DMSO	4	209
DMSO	4	197
DMSO	4	212
20uM LY	1	199
20uM LY	1	205
20uM LY	1	211
20uM LY	1	208
20uM LY	1	209
20uM LY	1	198
20uM LY	2	213
20uM LY	2	206
20uM LY	2	197
20uM LY	2	203
20uM LY	2	209
20uM LY	2	204
20uM LY	3	200
20uM LY	3	213
20uM LY	3	194
20uM LY	3	198
20uM LY	3	203
20uM LY	3	196
20uM LY	4	214
20uM LY	4	176
20uM LY	4	200
20uM LY	4	186
20uM LY	4	203
20uM LY	4	208

## Sheet: Fig 1- Fig Suppl. 4L_average
Figure 1 - Figure supplement 4L
Treatment	Total number of embryos	Average proliferation index	25th percentile	Median	75th percentile			p-values: Two sample t-test
DMSO	13	11.88	9.76	12.41	14.11			0.2599
20uM LY	8	10.68	9.46	10.58	12.16

## Sheet: Fig 1- Fig Suppl. 4L_raw
Figure 1 - Figure supplement 4L
Treatment	Replicate #	No. of cardiomyocytes	No. of proliferating cardiomyocytes	Proliferation index
DMSO	1	181	13	7.18232
DMSO	1	145	18	12.4138
DMSO	1	164	21	12.8049
DMSO	1	183	19	10.3825
DMSO	2	146	18	12.3288
DMSO	2	156	24	15.3846
DMSO	2	103	13	12.6214
DMSO	2	145	8	5.51724
DMSO	3	143	13	9.09091
DMSO	3	143	19	22.6087
DMSO	3	154	23	14.9351
DMSO	3	162	18	11.1111
DMSO	3	184	32	17.3913
20uM LY	1	176	17	9.65909
20uM LY	1	176	16	9.09091
20uM LY	1	149	14	9.39597
20uM LY	1	176	19	10.7955
20uM LY	2	158	20	12.6582
20uM LY	2	143	18	12.5874
20uM LY	2	164	17	10.3659
20uM LY	2	165	18	10.9091

## Sheet: TUNEL data
TUNEL_average
Treatment	Total number of embryos	Average number of cardiomyocytes	Average number of apoptotic cardiomyocytes
DMSO	17	205.118	0
20uM LY	19	203.526	0
TUNEL_raw
Treatment	Replicate #	Number of cardiomyocytes	Number of apoptotic cardiomyocytes
DMSO	1	201	0
DMSO	1	198	0
DMSO	1	205	0
DMSO	1	202	0
DMSO	1	206	0
DMSO	1	211	0
DMSO	2	214	0
DMSO	2	208	0
DMSO	2	197	0
DMSO	2	204	0
DMSO	2	208	0
DMSO	3	204	0
DMSO	3	199	0
DMSO	3	206	0
DMSO	3	215	0
DMSO	3	212	0
DMSO	3	197	0
20uM LY	1	199	0
20uM LY	1	205	0
20uM LY	1	211	0
20uM LY	1	208	0
20uM LY	1	209	0
20uM LY	1	198	0
20uM LY	2	213	0
20uM LY	2	206	0
20uM LY	2	197	0
20uM LY	2	203	0
20uM LY	2	209	0
20uM LY	2	204	0
20uM LY	3	200	0
20uM LY	3	213	0
20uM LY	3	194	0
20uM LY	3	198	0
20uM LY	3	201	0
20uM LY	3	203	0
20uM LY	3	196	0
