# Supplementary material for: The myocardium utilizes a platelet-derived growth factor receptor alpha (Pdgfra)–phosphoinositide 3-kinase (PI3K) signaling cascade to steer toward the midline during zebrafish heart tube formation
Source: eLife. 2023 Nov 3;12:e85930. doi: 10.7554/eLife.85930 (PMC10651176; doi:10.7554/eLife.85930)
Supplement: Figure 1—figure supplement 5—source data 1. [file elife-85930-fig1-figsupp5-data1.xlsx]

## Sheet: Fig 1- Fig Suppl. 5D-5J_raw
Figure 1 - Figure Supplement 5D-5J
Treatment; Genotype	Total number of embryos	Cardiac ring #	Posterior fusion #	Cardia bifida #		Cardiac ring %	Posterior fusion %	Cardia bifida %		p-values: Fisher's exact test
DMSO; +/+	23	23	0	0		100	0	0		DMSO +/+ - DMSO PTEN aabb	0.99999
DMSO; PTEN aaBb	50	50	0	0		100	0	0		DMSO +/+ - 5uM VOOH +/+	0.2396
DMSO; PTEN aabb	23	22	1	0		96.9697	3.0303	0		DMSO +/+ - 5uM PTEN aabb	0.0005613
										DMSO +/+ - 10uM VOOH +/+	0.1611
5uM VOOH; +/+	27	24	3	0		91.1111	8.88889	0		DMSO +/+ - 10uM PTEN aabb	8.21e-06
5uM VOOH; PTEN aaBb	47	37	10	0		78.9084	21.0916	0
5uM VOOH; PTEN aabb	22	13	9	0		41.2121	58.7879	0		DMSO PTEN aabb - 5uM VOOH +/+	0.6144
										DMSO PTEN aabb - 5uM VOOH PTEN aabb	0.004148
10uM VOOH; +/+	20	15	5	0		73.1481	26.8519	0		DMSO PTEN aabb - 10uM VOOH +/+	0.08141
10uM VOOH; PTEN aaBb	54	36	18	0		66.9658	33.0342	0		DMSO PTEN aabb - 10uM PTENaabb	0.0001126
10uM VOOH; PTEN aabb	20	8	12	0		40	60	0
										5uM VOOH +/+ - 5uM VOOH PTEN aabb	0.02174
										5uM VOOH +/+ - 10uM VOOH +/+	0.2581
										5uM VOOH +/+ - 10uM VOOH PTEN aabb	0.000551
										5uM VOOH PTEN aabb - 10uM VOOH +/+	0.03376
										5uM VOOH PTEN aabb - 10uM VOOH PTEN aabb	0.3543
										10uM VOOH +/+ - 10uM PTEN aabb	0.006355
