# Supplementary material for: The myocardium utilizes a platelet-derived growth factor receptor alpha (Pdgfra)–phosphoinositide 3-kinase (PI3K) signaling cascade to steer toward the midline during zebrafish heart tube formation
Source: eLife. 2023 Nov 3;12:e85930. doi: 10.7554/eLife.85930 (PMC10651176; doi:10.7554/eLife.85930)
Supplement: Figure 1—figure supplement 6—source data 1. [file elife-85930-fig1-figsupp6-data1.xlsx]

## Sheet: Fig 1- Fig Suppl. 6F_average
Figure 1 - Figure supplement 6F
Treatment	Total number of embryos	Average cardiac fusion defect %	SEM		p-values: ONE-WAY ANOVA
DMSO	45	0	0		DMSO-10uM VOOH	0.093839
10uM VOOH	45	26.6667	3.84		DMSO-15uM VOOH	0.0001289
15uM VOOH	45	46.6667	7.69		DMSO- 20uM VOOH	2.4e-05
20uM VOOH	46	56.5278	1.93		DMSO-25uM VOOH	5.3e-06
25uM VOOH	45	66.6667	3.84

## Sheet: Fig 1- Fig Suppl. 6F_raw
Figure 1 - Figure supplement 6F
Treatment	No. of embryos	Replicate #	Cardiac fusion defect %	Average cardiac fusion defect %
DMSO	15	1	0	0
DMSO	15	2	0
DMSO	15	3	0
10uM VOOH	15	1	20	26.6667
10uM VOOH	15	2	26.6667
10uM VOOH	15	3	33.3333
15uM VOOH	15	1	60	46.6667
15uM VOOH	15	2	33.3333
15uM VOOH	15	3	46.6667
20uM VOOH	16	1	56.25	56.5278
20uM VOOH	15	2	53.3333
20uM VOOH	15	3	60
25uM VOOH	15	1	66.6667	66.6667
25uM VOOH	15	2	60
25uM VOOH	15	3	73.3333

## Sheet: Fig 1- Fig Suppl. 6G_average
Figure 1 - Figure supplement 6G
Treatment	Total number of embryos	Average Cardiac ring %	Cardiac ring SEM	Average Posterior fusion %	Posterior fusion SEM	Average Cardia bifida %	Cardia bifida SEM
DMSO	45	100	0	0	0	0	0
10uM VOOH	45	73.3333	3.848	26.6667	10.183	0	0
15uM VOOH	45	53.3333	7.699	46.6667	7.699	0	0
20uM VOOH	46	43.4722	1.93	32.6389	0.693	23.8889	2.004
25uM VOOH	45	33.3333	3.848	42.2222	4.447	24.4444	2.223

## Sheet: Fig 1- Fig Suppl. 6G_raw
Figure 1 - Figure supplement 6G
Treatment	Replicate #	No. of embryos	Cardiac ring %	Posterior fusion %	Cardia bifida %
DMSO	1	15	100		0
DMSO	2	15	100	0	0
DMSO	3	15	100	0	0
10uM VOOH	1	15	80	20	0
10uM VOOH	2	15	73.3333	26.6667	0
10uM VOOH	3	15	66.6667	33.3333	0
15uM VOOH	1	15	40	60	0
15uM VOOH	2	15	66.6667	33.3333	0
15uM VOOH	3	15	53.3333	46.6667	0
20uM VOOH	1	16	43.75	31.25	25
20uM VOOH	2	15	46.6667	33.3333	20
20uM VOOH	3	15	40	33.3333	26.6667
25uM VOOH	1	15	33.3333	46.6667	20
25uM VOOH	2	15	40	33.3333	26.6667
25uM VOOH	3	15	26.6667	46.6667	26.6667

## Sheet: Fig 1- Fig Suppl. 6H_average
Figure 1 - Figure supplement 6H
Treatment	Total number of replicates	Average pAkt/Akt	SEM		p-values: ONE-WAY ANOVA
DMSO	3	1	0		DMSO-10uM VOOH	0.1736
10uM VOOH	3	1.66685	0.32		DMSO-15uM VOOH	0.01796
15uM VOOH	3	2.75666	0.86		DMSO- 20uM VOOH	0.00903
20uM VOOH	3	3.22353	0.71		DMSO-25uM VOOH	0.002715
25uM VOOH	3	3.39747	1.6

## Sheet: Fig 1- Fig Suppl. 6H_raw
Figure 1 - Figure supplement 6H
Treatment	Replicate #	pAkt/Akt
DMSO	1	1
DMSO	2	1
DMSO	3	1
10uM VOOH	1	1.14763
10uM VOOH	2	2.25424
10uM VOOH	3	1.5987
15uM VOOH	1	2.68617
15uM VOOH	2	4.29043
15uM VOOH	3	1.29339
20uM VOOH	1	1.98916
20uM VOOH	2	4.47476
20uM VOOH	3	3.20667
25uM VOOH	1	1.52746
25uM VOOH	2	6.56918
25uM VOOH	3	2.09578
