# Supplementary material for: The myocardium utilizes a platelet-derived growth factor receptor alpha (Pdgfra)–phosphoinositide 3-kinase (PI3K) signaling cascade to steer toward the midline during zebrafish heart tube formation
Source: eLife. 2023 Nov 3;12:e85930. doi: 10.7554/eLife.85930 (PMC10651176; doi:10.7554/eLife.85930)
Supplement: Figure 1—source data 1. [file elife-85930-fig1-data1.xlsx]

## Sheet: Fig 1F_average_all replicates
Fig. 1F
Treatment	Total number of embryos	Average cardiac fusion defect %	SEM		p values: ONE-WAY ANOVA
DMSO	37	0	0		DMSO-20uM LY	5.62e-05
20uM LY	31	75.3333	12.4544		DMSO-40uM Dac	0.0004899
40uM Dac	39	58.3333	4.81221		DMSO-50uM Pic	0.0017477
50uM Pic	38	49.6033	4.47021		DMSO-750pg dnPI3K	0.037786
750pg dnPI3K	86	31	1

## Sheet: Fig 1F_raw data_each replicate
Fig. 1F
Treatment	No. of embryos	Replicate #	Cardiac fusion defect %	Average cardiac fusion defect %	SEM
DMSO	10	1	0	0	0
DMSO	15	2	0
DMSO	12	3	0
20uM LY	9	1	100	75.3333	12.4544
20uM LY	10	2	60
20uM LY	12	3	66
40uM Dac	15	1	66.67	58.3333	4.81221
40uM Dac	12	2	58.33
40uM Dac	12	3	50
50uM Pic	14	1	57.14	49.6033	4.47021
50uM Pic	12	2	50
50uM Pic	12	3	41.67
750pg dnPI3K	28	1	30	31	1
750pg dnPI3K	30	2	30
750pg dnPI3K	28	3	33

## Sheet: Fig 1H_average_all replicates
Fig. 1H
Treatment	Total number of replicates	Average pAkt/Akt			p-values: ONE-WAY ANOVA
DMSO	3	1	0		DMSO-10LY	0.102898
10uM LY	3	0.711526	0.0588644		DMSO-15LY	6.95e-05
15uM LY	3	0.204257	0.0531044		DMSO-20LY	2.89e-05
20uM LY	3	0.139372	0.0679635		DMSO-25LY	1.16e-05
25uM LY	3	0.046715	0.0330365

## Sheet: Fig1H_raw data_each replicate
Fig. 1H
Treatment	Replicate #	pAkt/Akt		Average pAkt/Akt	SEM
DMSO	1	1		1	0
DMSO	2	1
DMSO	3	1
10uM LY	1	0.862969		0.711526	0.0588644
10uM LY	2	0.596218
10uM LY	3	0.741916
15uM LY	1	0.082827		0.204257	0.0531044
15uM LY	2	0.301596
15uM LY	3	0.284607
20uM LY	1	0.01759		0.139372	0.0679635
20uM LY	2	0.33084
20uM LY	3	0.0770566
25uM LY	1	0.002879		0.046715	0.0330365
25uM LY	2	0.1436
25uM LY	3	0.00637924
