# Supplementary material for: The myocardium utilizes a platelet-derived growth factor receptor alpha (Pdgfra)–phosphoinositide 3-kinase (PI3K) signaling cascade to steer toward the midline during zebrafish heart tube formation
Source: eLife. 2023 Nov 3;12:e85930. doi: 10.7554/eLife.85930 (PMC10651176; doi:10.7554/eLife.85930)
Supplement: Figure 2—figure supplement 1—source data 1. [file elife-85930-fig2-figsupp1-data1.xlsx]

## Sheet: Fig 2- Fig Suppl. 1D_average
Figure 2 - Figure supplement 1D
Treatment	Total number of embryos	Average width of axial expression	25th percentile	Median	75th percentile			p-values: ONE-WAY ANOVA
DMSO	47	214.787	209	218	225			DMSO-15uM LY	0.999673
15uM LY	47	214.723	203	218	225			DMSO-25uM LY	0.291966
25uM LY	47	210.553	198	212	225

## Sheet: Fig 2- Fig Suppl. 1D_raw
Figure 2 - Figure supplement 1D
Treatment	Replicate #	Width of axial expression
DMSO	1	212
DMSO	1	190
DMSO	1	196
DMSO	1	203
DMSO	1	209
DMSO	1	224
DMSO	1	220
DMSO	1	234
DMSO	1	231
DMSO	1	209
DMSO	1	212
DMSO	1	210
DMSO	1	219
DMSO	1	220
DMSO	1	213
DMSO	2	190
DMSO	2	212
DMSO	2	215
DMSO	2	219
DMSO	2	234
DMSO	2	227
DMSO	2	225
DMSO	2	218
DMSO	2	219
DMSO	2	212
DMSO	2	196
DMSO	2	187
DMSO	2	189
DMSO	2	201
DMSO	2	205
DMSO	3	198
DMSO	3	202
DMSO	3	212
DMSO	3	230
DMSO	3	231
DMSO	3	209
DMSO	3	219
DMSO	3	221
DMSO	3	213
DMSO	3	234
DMSO	3	227
DMSO	3	226
DMSO	3	229
DMSO	3	218
DMSO	3	221
DMSO	3	229
DMSO	3	225
15uM LY	1	198
15uM LY	1	187
15uM LY	1	202
15uM LY	1	215
15uM LY	1	223
15uM LY	1	220
15uM LY	1	219
15uM LY	1	198
15uM LY	1	209
15uM LY	1	229
15uM LY	1	227
15uM LY	1	227
15uM LY	1	218
15uM LY	1	219
15uM LY	1	221
15uM LY	2	205
15uM LY	2	209
15uM LY	2	229
15uM LY	2	217
15uM LY	2	220
15uM LY	2	219
15uM LY	2	221
15uM LY	2	225
15uM LY	2	231
15uM LY	2	210
15uM LY	2	193
15uM LY	2	223
15uM LY	2	228
15uM LY	2	217
15uM LY	2	220
15uM LY	3	213
15uM LY	3	196
15uM LY	3	187
15uM LY	3	228
15uM LY	3	224
15uM LY	3	231
15uM LY	3	224
15uM LY	3	221
15uM LY	3	230
15uM LY	3	227
15uM LY	3	223
15uM LY	3	218
15uM LY	3	194
15uM LY	3	197
15uM LY	3	186
15uM LY	3	204
15uM LY	3	210
25uM LY	1	178
25uM LY	1	197
25uM LY	1	232
25uM LY	1	228
25uM LY	1	225
25uM LY	1	218
25uM LY	1	221
25uM LY	1	186
25uM LY	1	180
25uM LY	1	229
25uM LY	1	224
25uM LY	1	206
25uM LY	1	201
25uM LY	1	210
25uM LY	1	212
25uM LY	2	179
25uM LY	2	209
25uM LY	2	205
25uM LY	2	210
25uM LY	2	215
25uM LY	2	229
25uM LY	2	230
25uM LY	2	232
25uM LY	2	218
25uM LY	2	229
25uM LY	2	218
25uM LY	2	232
25uM LY	2	198
25uM LY	2	187
25uM LY	2	207
25uM LY	3	215
25uM LY	3	219
25uM LY	3	220
25uM LY	3	225
25uM LY	3	232
25uM LY	3	227
25uM LY	3	184
25uM LY	3	189
25uM LY	3	203
25uM LY	3	193
25uM LY	3	187
25uM LY	3	204
25uM LY	3	209
25uM LY	3	229
25uM LY	3	189
25uM LY	3	203
25uM LY	3	223

## Sheet: Fig 2- Fig Suppl. 1H_average
Figure 2 - Figure supplement 1H
Treatment	Total number of embryos	Average width of sox17 expression	25th percentile	Median	75th percentile			p-values: ONE-WAY ANOVA
DMSO	42	186.786	179	187	192.25			DMSO-15uM LY	0.488855
15uM LY	42	189.452	180.75	189.5	198			DMSO-25uM LY	0.9079
25uM LY	42	187.762	179	189	193.5

## Sheet: Fig 2- Fig Suppl. 1H_raw
Figure 2 - Figure supplement 1H
Treatment	Replicate #	Width of sox17 expression
DMSO	1	182
DMSO	1	178
DMSO	1	190
DMSO	1	192
DMSO	1	189
DMSO	1	183
DMSO	1	179
DMSO	1	175
DMSO	1	173
DMSO	1	201
DMSO	1	199
DMSO	1	200
DMSO	1	189
DMSO	1	190
DMSO	1	179
DMSO	2	198
DMSO	2	172
DMSO	2	179
DMSO	2	180
DMSO	2	183
DMSO	2	185
DMSO	2	193
DMSO	2	179
DMSO	2	190
DMSO	2	183
DMSO	2	187
DMSO	2	201
DMSO	2	205
DMSO	2	198
DMSO	3	178
DMSO	3	186
DMSO	3	192
DMSO	3	203
DMSO	3	200
DMSO	3	189
DMSO	3	187
DMSO	3	189
DMSO	3	176
DMSO	3	190
DMSO	3	176
DMSO	3	178
DMSO	3	169
15uM LY	1	191
15uM LY	1	187
15uM LY	1	181
15uM LY	1	190
15uM LY	1	192
15uM LY	1	189
15uM LY	1	183
15uM LY	1	179
15uM LY	1	198
15uM LY	1	203
15uM LY	1	210
15uM LY	1	219
15uM LY	1	198
15uM LY	1	179
15uM LY	1	167
15uM LY	2	176
15uM LY	2	163
15uM LY	2	193
15uM LY	2	200
15uM LY	2	205
15uM LY	2	190
15uM LY	2	193
15uM LY	2	189
15uM LY	2	183
15uM LY	2	203
15uM LY	2	180
15uM LY	2	188
15uM LY	2	204
15uM LY	2	167
15uM LY	3	194
15uM LY	3	189
15uM LY	3	176
15uM LY	3	190
15uM LY	3	179
15uM LY	3	183
15uM LY	3	187
15uM LY	3	192
15uM LY	3	198
15uM LY	3	204
15uM LY	3	209
15uM LY	3	167
15uM LY	3	189
25uM LY	1	202
25uM LY	1	198
25uM LY	1	176
25uM LY	1	189
25uM LY	1	173
25uM LY	1	180
25uM LY	1	192
25uM LY	1	195
25uM LY	1	199
25uM LY	1	189
25uM LY	1	172
25uM LY	1	178
25uM LY	1	190
25uM LY	1	187
25uM LY	1	182
25uM LY	2	192
25uM LY	2	198
25uM LY	2	203
25uM LY	2	209
25uM LY	2	193
25uM LY	2	173
25uM LY	2	172
25uM LY	2	186
25uM LY	2	184
25uM LY	2	191
25uM LY	2	193
25uM LY	2	203
25uM LY	2	190
25uM LY	2	176
25uM LY	3	187
25uM LY	3	187
25uM LY	3	193
25uM LY	3	179
25uM LY	3	205
25uM LY	3	190
25uM LY	3	179
25uM LY	3	178
25uM LY	3	169
25uM LY	3	187
25uM LY	3	198
25uM LY	3	180
25uM LY	3	189
