# Supplementary material for: The myocardium utilizes a platelet-derived growth factor receptor alpha (Pdgfra)–phosphoinositide 3-kinase (PI3K) signaling cascade to steer toward the midline during zebrafish heart tube formation
Source: eLife. 2023 Nov 3;12:e85930. doi: 10.7554/eLife.85930 (PMC10651176; doi:10.7554/eLife.85930)
Supplement: Figure 2—figure supplement 2—source data 1. [file elife-85930-fig2-figsupp2-data1.xlsx]

## Sheet: Fig 2- Fig Suppl. 2C-2E_average
Figure 2 - Figure supplement 2C-2E
		Length of cell												SEM
	Treatment	0	0.1	0.2	0.3	0.4	0.5	0.6	0.7	0.8	0.9	1		0	0.1	0.2	0.3	0.4	0.5	0.6	0.7	0.8	0.9	1
Average GFP intensity	DMSO	171.248	131.838	112.229	99.5285	85.319	88.3528	94.1679	97.0419	113.942	132.039	144.569		4.76	4.77	5.52	7.65	2.34	3.28	3.01	4.63	5.52	7.6	6.6
	20uM LY	166.57	153.676	103.554	84.6599	95.0682	90.2366	94.626	114.114	128.748	140.103	136.746		18.01	23.08	18.48	12.76	9.12	9.67	8.32	11.49	16.12	14.9	14.15
Average mkate2 intensity	DMSO	268.83	199.482	163.882	129.436	88.5606	84.7261	86.7928	88.337	91.582	86.9537	80.3585		5.93	5.46	4.57	4.6	3.52	3.87	4.7	3.52	3.5	3.43	4.32
	20uM LY	120.116	121.747	121.208	127.147	132.145	122.241	111.196	106.012	107.45	110.681	111.086		12.58	10.08	6.95	17.004	17.43	17.28	17.57	10.26	7.57	9.41	9.08
Average mkate2/GFP intensity	DMSO	1.59789	1.55308	1.54717	1.30706	1.05167	0.983039	0.944181	0.94682	0.849055	0.702234	0.57093		0.069	0.076	0.109	0.075	0.05	0.06	0.07	0.067	0.069	0.056	0.036
	20uM LY	0.77271	1.06769	2.01421	1.90494	1.42121	1.40502	1.12905	1.02233	0.959149	0.854705	0.911116		0.086	0.196	0.537	0.36	0.16	0.197	0.124	0.126	0.115	0.0996	0.1158
p- values - Two tailed t test
GFP vs mkate intensity	DMSO	3.57e-13	1.704e-09	9.04e-05	0.0007	0.4503	0.4805	0.1971	0.1452	0.002	1.9e-05	1.187e-09
	20uM LY	0.0464	0.2226	0.03854	0.048	0.00757	0.01228	0.04059	0.6039	0.2483	0.01105	0.01425
mkate/GFP ratio	DMSO vs 20uM LY	9.766e-08	0.00356	0.4096	0.0286	0.0448	0.0487	0.2122	0.6036	0.4224	0.1995	0.0139

## Sheet: Fig 2- Fig Suppl. 2C_raw
Figure 2 - Figure supplement 2C
				Length of cell
	Treatment	Embryo #	Cell #	0	0.1	0.2	0.3	0.4	0.5	0.6	0.7	0.8	0.9	1
GFP Intensity	DMSO	1	1	187.34	145.56	157.701	96.0067	83.085	91.252	119.427	83.0133	111.654	128.222	137.795
	DMSO	1	2	201.23	151.23	161.545	95.8963	86.9712	103.212	104.636	93.9853	120.574	151.432	138.849
	DMSO	1	3	129.45	116.67	161.545	105.453	85.2562	103.212	104.64	97.5853	137.243	156.111	138.485
	DMSO	1	4	134.45	117.126	82.059	69.7737	65.3735	81.6886	85.9534	70.6406	70.0178	90.2942	176.21
	DMSO	1	5	167.34	110.676	125.413	104.823	96.725	91.19	107.871	105.863	109.705	100.648	99.0123
	DMSO	2	1	178.45	126.314	108.504	125.317	88.6493	100.995	94.1834	109.491	103.155	121.764	127.94
	DMSO	2	2	164.45	114.253	122.573	108.41	83.4867	104.512	98.3687	103.064	128.878	150.699	119.184
	DMSO	2	3	193.34	164.672	108.479	110.771	77.8075	85.2633	87.7908	130	166.458	162	182.208
	DMSO	2	4	193.34	143.857	111.465	94.0987	103.703	74.0787	114.601	112.385	102.115	119.429	118.905
	DMSO	2	5	176.34	134.199	91.6402	95.0992	89.4603	103.405	92.301	115.109	109.311	129.261	153.583
	DMSO	3	1	163.34	151.282	110.055	100.583	95.1308	103.194	83.3628	99.3733	98.2147	112.576	113.086
	DMSO	3	2	154.78	123.231	84.5204	86.614	71.4473	63.7942	86.352	74.7628	103.406	100.525	136.107
	DMSO	3	3	167.9	123.231	84.5204	86.614	71.4473	63.7942	86.352	74.7628	103.406	100.525	136.181
	DMSO	3	4	175.45	121.56	91.0329	104.695	91.8131	85.7881	90.9691	93.0618	105.198	129.613	160.693
	DMSO	3	5	167.34	111.626	110.721	107.807	86.311	81.058	87.9767	127.383	136.24	114.291	154.09
	DMSO	4	1	191.23	186.517	115.56	97.505	87.7433	85.88	83.03	95.08	88.6567	215.04	207.196
	DMSO	4	2	165.45	99.25	80.56	102.517	86.0118	79.68	73.04	64.153	142.773	162.223	158.146
mkate2 Intensity	DMSO	1	1	245.34	203.34	161.545	102.778	84.2262	56.67	69.0033	97.606	87.67	88.3847	98.45
	DMSO	1	2	213.34	214.45	161.545	196.54	89.8088	103.212	102.107	80.56	87.67	96.67	88.981
	DMSO	1	3	279.34	178.45	148.809	187.45	77.6852	81.6886	85.9534	70.6406	70.0178	92.428	73.181
	DMSO	1	4	276.67	148.89	139.05	107.776	85.1018	92.1648	96.1685	78.67	117.174	117.472	90.4867
	DMSO	1	5	210.23	208.15	182.895	104.823	65.56	101.5	97.78	69.56	109.705	100.648	62.34
	DMSO	2	1	276.67	208.56	143.746	143.396	83.745	62.2633	87.2207	78.076	88.3393	106.154	83.6183
	DMSO	2	2	276.45	165.6	154.667	117.233	102.667	64.6667	60.89	86	86.67	88.7833	66.67
	DMSO	2	3	260.3	206.113	143.205	132.205	86.9647	100.169	99.184	114.179	75.6247	81.5575	86.59
	DMSO	2	4	260.56	193.461	161.008	125.289	101.447	101.5	94.7307	86.67	116.435	72.2533	105.56
	DMSO	2	5	289.45	208.732	173.358	100.583	95.1308	103.194	83.3628	99.3733	98.2147	87.6801	79.7553
	DMSO	3	1	290.4	209.5	156.458	175.56	73.1748	78.3146	73.5459	103.406	100.525	85.24	78.9667
	DMSO	3	2	290.4	210.28	184.52	86.614	71.4473	63.7942	86.352	74.7628	103.406	80.52	64.32
	DMSO	3	3	287.56	207.56	189.45	104.695	101.082	88.9465	90.5741	89.8426	93.0618	85.19	69.78
	DMSO	3	4	275.45	200.613	144.055	111.052	72.34	70.65	41.94	77.76	86.24	84.29	54.45
	DMSO	3	5	278.45	248.56	168.297	129.239	87.67	87.67	74.6112	98.67	84.32	85.34	123.045
	DMSO	4	1	278.6	173.34	165.708	142.688	108.718	96.14	103.93	78.6667	67.95	70.89	81.23
	DMSO	4	2	280.9	205.6	207.67	132.496	118.762	87.801	128.123	117.287	83.87	54.71	58.67

## Sheet: Fig 2- Fig Suppl. 2D_raw
Figure 2 - Figure supplement 2D
				Length of cell
	Treatment	Embryo #	Cell #	0	0.1	0.2	0.3	0.4	0.5	0.6	0.7	0.8	0.9	1
GFP Intensity	20uM LY	1	1	265.56	246.24	234.5	173.766	145	143.812	142.344	113.547	106.938	177.808	172.8
	20uM LY	1	2	254.45	254.56	17.5	27.5	37.5	47.5	57.5	67.5	77.5	87.5	97.5
	20uM LY	1	3	243.45	255	16.129	25.8064	35.4839	45.1613	54.8387	66.129	77.4193	87.0967	96.7742
	20uM LY	1	4	234.5	254	197.321	25	98.6667	46.4285	117.119	138.429	235.738	221.119	193.443
	20uM LY	1	5	198.33	236.15	162.893	113.811	131.622	132.304	135	215	255	255	255
	20uM LY	2	1	103.34	55.4931	100.157	84.3139	94.6403	90.6231	62.8864	112.938	128.763	106.618	108.709
	20uM LY	2	2	98.45	62.0769	38.2644	102.012	94.9603	91.8481	89.0567	88.896	101.67	80.506	147.623
	20uM LY	3	1	123.34	96.1562	78.0767	142.39	140.56	99.9258	85.375	109.083	116.062	122.667	120.375
	20uM LY	3	2	132.34	100.25	79.3333	53.6667	89.6667	138.667	133.333	96.5	106.333	150.667	122.667
	20uM LY	3	3	98.67	71.9167	76.3333	75.0567	95.6333	115.56	90.9683	141.967	81.3125	141.17	103.188
	20uM LY	3	4	134.3	110.5	109.917	80.5767	83.8167	66.0717	107.783	152.223	95.875	123.627	84.8611
	20uM LY	4	1	102.23	88.109	85.3336	73.34	89.5767	67.615	77.2633	113.598	112.669	98.8006	90.3135
	20uM LY	4	2	176.45	167.34	150.45	123.34	98.76	87.56	76.67	67.67	178.45	168.76	184.45
mkate2 Intensity	20uM LY	1	1	187.56	145.494	143	142.241	203.574	213.444	205.148	102.77	95	139.59	164.56
	20uM LY	1	2	176.45	155	125	60	35	35	35	135	135	164.96	154.46
	20uM LY	1	3	93.34	155	81.6667	45	78.67	42.5803	36.7695	82.17	94.52	95	165.56
	20uM LY	1	4	156.67	153.099	147.944	138	208.7	88	196.856	83.34	152.83	162.58	106.922
	20uM LY	1	5	87.56	87.6253	123.53	191.989	200.655	192.97	210.161	204.84	94.71	149.22	111.145
	20uM LY	2	1	154.56	142.59	110.257	228	108.159	171	84.6198	78.3887	80.2318	70.9036	68.5586
	20uM LY	2	2	65.45	140	80.9301	208	112.555	82.0747	44.6016	150.07	151.23	58.2	58.9883
	20uM LY	3	1	87.45	102.716	142.221	143.587	147.469	143.754	133.235	76.1211	88.9853	103.314	110.29
	20uM LY	3	2	80.45	97.0555	153.685	142.426	236	139.222	116.778	98.3	65.6667	90.6852	92.1111
	20uM LY	3	3	91.23	107.857	145.09	56	59.6667	65.0714	40.619	88.6428	96.2143	98.4762	105.714
	20uM LY	3	4	176.56	165.27	121.806	128.639	112.278	213	120.944	79.6111	134.23	88.3633	102.197
	20uM LY	4	1	67.67	85.4491	107.236	125.683	125.598	124.346	118.477	100.01	107.894	118.226	102.383
	20uM LY	4	2	136.56	45.56	93.34	43.34	89.56	78.67	102.34	98.89	100.34	99.34	101.23

## Sheet: Fig 2- Fig Suppl. 2E_raw
Figure 2 - Figure supplement 2E
			mkate2/GFP intensity spanning the length of cell
Treatment	Embryo #	Cell #	0	0.1	0.2	0.3	0.4	0.5	0.6	0.7	0.8	0.9	1
DMSO	1	1	1.3096	1.39695	1.02438	1.07053	1.01374	0.621027	0.577785	1.17579	0.785196	0.68931	0.714465
DMSO	1	2	1.06018	1.41804	1	2.0495	1.03263	1	0.97583	0.857155	0.727103	0.638373	0.640849
DMSO	1	3	2.1579	1.52953	0.921162	1.77757	0.911197	0.791462	0.821422	0.723885	0.510175	0.592066	0.52844
DMSO	1	4	2.05779	1.2712	1.69452	1.54465	1.30178	1.12825	1.11885	1.11367	1.67349	1.301	0.513516
DMSO	1	5	1.2563	1.88071	1.45834	1	0.677798	1.11306	0.906449	0.657078	1	1	0.629619
DMSO	2	1	1.55041	1.65113	1.3248	1.14426	0.944678	0.616499	0.926073	0.71308	0.856375	0.871802	0.653576
DMSO	2	2	1.68106	1.44941	1.26183	1.08138	1.22974	0.618751	0.618998	0.834434	0.672499	0.589142	0.559387
DMSO	2	3	1.34633	1.25166	1.32012	1.1935	1.11769	1.17482	1.12978	0.878297	0.454316	0.503441	0.475225
DMSO	2	4	1.34768	1.34481	1.44448	1.33147	0.978242	1.37016	0.826615	0.771192	1.14023	0.604992	0.887768
DMSO	2	5	1.64143	1.5554	1.89173	1.05766	1.06339	0.997957	0.903162	0.863299	0.898485	0.678316	0.519297
DMSO	3	1	1.77789	1.38483	1.42164	1.74543	0.769202	0.75891	0.88224	1.04059	1.02353	0.757179	0.698288
DMSO	3	2	1.87621	1.70639	2.18314	1	1	1	1	1	1	0.800991	0.472568
DMSO	3	3	1.71269	1.68432	2.24147	1.20876	1.41478	1.39427	1.04889	1.2017	0.899961	0.847447	0.512408
DMSO	3	4	1.56996	1.65031	1.58245	1.06072	0.787905	0.823541	0.461036	0.835574	0.819791	0.650322	0.338844
DMSO	3	5	1.66398	2.22672	1.52	1.1988	1.01575	1.08157	0.84808	0.774593	0.618908	0.746687	0.798526
DMSO	4	1	1.45688	0.929351	1.43396	1.46339	1.23905	1.11947	1.25172	0.827373	0.76644	0.329659	0.392045
DMSO	4	2	1.69779	2.07154	2.57783	1.29243	1.38076	1.10192	1.75415	1.82823	0.587436	0.337252	0.370986
20uM LY	1	1	0.706281	0.590863	0.609808	0.818578	1.40396	1.48419	1.44122	0.905089	0.888369	0.785062	0.952315
20uM LY	1	2	0.693456	0.608894	7.14287	2.18181	0.933333	0.736843	0.608695	2	1.74193	1.88526	1.58421
20uM LY	1	3	0.383405	0.607843	5.06334	1.74375	2.21706	0.94285	0.670503	1.24257	1.22088	1.09074	1.71079
20uM LY	1	4	0.668102	0.602751	0.749764	5.52	2.1152	1.89539	1.68082	0.602043	0.648304	0.73526	0.552731
20uM LY	1	5	0.441486	0.371058	0.75835	1.68691	1.52448	1.45854	1.55675	0.952744	0.371412	0.585176	0.435863
20uM LY	2	1	1.49565	2.56951	1.10083	2.70418	1.14284	1.88694	1.3456	0.694088	0.623098	0.665027	0.630661
20uM LY	2	2	0.664804	2.25527	2.11502	2.03898	1.18529	0.893591	0.500823	1.68815	1.48746	0.722927	0.399586
20uM LY	3	1	0.709016	1.06822	1.82156	1.00841	1.04916	1.43861	1.56059	0.697826	0.766702	0.842231	0.916216
20uM LY	3	2	0.607904	0.968135	1.93721	2.6539	2.63197	1.00401	0.875833	1.01865	0.617555	0.601893	0.750906
20uM LY	3	3	0.924597	1.49975	1.90074	0.746103	0.623911	0.563097	0.446518	0.624392	1.18327	0.697572	1.02449
20uM LY	3	4	1.31467	1.49566	1.10816	1.59648	1.33956	3.22377	1.12211	0.522989	1.40005	0.714759	1.20428
20uM LY	4	1	0.661939	0.969811	1.25667	1.71371	1.40213	1.83902	1.53342	0.880389	0.957617	1.19661	1.13364
20uM LY	4	2	0.77393	0.27226	0.620405	0.351386	0.906845	0.89847	1.33481	1.46136	0.562286	0.588647	0.548821
