# Supplementary material for: The myocardium utilizes a platelet-derived growth factor receptor alpha (Pdgfra)–phosphoinositide 3-kinase (PI3K) signaling cascade to steer toward the midline during zebrafish heart tube formation
Source: eLife. 2023 Nov 3;12:e85930. doi: 10.7554/eLife.85930 (PMC10651176; doi:10.7554/eLife.85930)
Supplement: Figure 2—source data 1. [file elife-85930-fig2-data1.xlsx]

## Sheet: Fig 2A_average all replicates
Figure 2A
Treatment	Time of treatment	Total no. of embryos	Average cardiac ring %	Average posterior fusion %	Average cardia bifida %		Cardiac ring SEM	Posterior fusion SEM	Cardia bifida SEM
DMSO	bud	45	100	0	0		0	0	0
	3s	45	100	0	0		0	0	0
	12s	45	100	0	0		0	0	0
	14s	45	100	0	0		0	0	0
	16s	45	100	0	0		0	0	0
	18s	45	100	0	0		0	0	0
20uM LY	bud	45	25.8	35.5	38.7		13.33	4.54	8.94
	3s	45	29.11	39.89	31		4.5591	3.94657	2.16709
	12s	45	57.6667	31.2233	11.11		7.90405	2.11167	5.87924
	14s	45	77.6667	17.89	4.44333		7.90405	5.77542	2.22167
	16s	45	100	0	0		0	0	0
	18s	45	100	0	0		0	0	0

## Sheet: Fig 2A_raw data_each replicate
Fig. 2A
Treatment	Time of treatment	Replicate #	Total no. of embryos	Cardiac ring %	Posterior fusion %	Cardia bifida %
DMSO	bud	1	15	100	0	0
	bud	2	15	100	0	0
	bud	3	15	100	0	0
	3s	1	15	100	0	0
	3s	2	15	100	0	0
	3s	3	15	100	0	0
	12s	1	15	100	0	0
	12s	2	15	100	0	0
	12s	3	15	100	0	0
	14s	1	15	100	0	0
	14s	2	15	100	0	0
	14s	3	15	100	0	0
	16s	1	15	100	0	0
	16s	2	15	100	0	0
	16s	3	15	100	0	0
	18s	1	15	100	0	0
	18s	2	15	100	0	0
	18s	3	15	100	0	0
20uM LY	bud	1	15	0	45	55
	bud	2	15	40	30	30
	bud	3	15	40	33.33	26.67
	3s	1	15	34	33	33
	3s	2	15	20	46.67	33.33
	3s	3	15	33.33	40	26.67
	12s	1	15	73	27	0
	12s	2	15	46.67	33.33	20
	12s	3	15	53.33	33.34	13.33
	14s	1	15	93	7	0
	14s	2	15	73.33	20	6.67
	14s	3	15	66.67	26.67	6.66
	16s	1	15	100	0	0
	16s	2	15	100	0	0
	16s	3	15	100	0	0
	18s	1	15	100	0	0
	18s	2	15	100	0	0
	18s	3	15	100	0	0

## Sheet: Fig 2B_average_all replicates
Figure 2B
Treatment at bud stage	Time of wash - out	Total no. of embryos	Average cardiac ring %	Average posterior fusion %	Average cardia bifida %		Cardiac ring SEM	Posterior fusion SEM	Cardia bifida SEM
DMSO	3s	45	100	0	0		0	0	0
	12s	45	100	0	0		0	0	0
	14s	45	100	0	0		0	0	0
	16s	45	100	0	0		0	0	0
	18s	45	100	0	0		0	0	0
	20s	45	100	0	0		0	0	0
20uM LY	3s	45	100	0	0		0	0	0
	12s	45	79.89	20.11	0		3.94657	3.94657	0
	14s	45	71	24.5	4.5		2.16709	5.82635	4.5
	16s	45	59.89	22.2233	17.8867		3.94657	2.22333	4.55667
	18s	45	46.6633	24.4467	28.89		3.84804	2.22333	5.87924
	20s	45	35.5533	24.4467	40		2.22333	2.22333	0

## Sheet: Fig 2B_raw data_each replicate
Fig. 2B
Treatment at bud stage	Time of wash - out	Replicate #	Total no. of embryos	Cardiac ring %	Posterior fusion %	Cardia bifida %
DMSO	3s	1	15	100	0	0
	3s	2	15	100	0	0
	3s	3	15	100	0	0
	12s	1	15	100	0	0
	12s	2	15	100	0	0
	12s	3	15	100	0	0
	14s	1	15	100	0	0
	14s	2	15	100	0	0
	14s	3	15	100	0	0
	16s	1	15	100	0	0
	16s	2	15	100	0	0
	16s	3	15	100	0	0
	18s	1	15	100	0	0
	18s	2	15	100	0	0
	18s	3	15	100	0	0
	20s	1	15	100	0	0
	20s	2	15	100	0	0
	20s	3	15	100	0	0
20uM LY	3s	1	15	100	0	0
	3s	2	15	100	0	0
	3s	3	15	100	0	0
	12s	1	15	80	20	0
	12s	2	15	86.67	13.33	0
	12s	3	15	73	27	0
	14s	1	15	66.67	33.33	0
	14s	2	15	73.33	26.67	0
	14s	3	15	73	13.5	13.5
	16s	1	15	60	26.67	13.33
	16s	2	15	66.67	20	13.33
	16s	3	15	53	20	27
	18s	1	15	53.33	26.67	20
	18s	2	15	46.66	26.67	26.67
	18s	3	15	40	20	40
	20s	1	15	33.33	26.67	40
	20s	2	15	40	20	40
	20s	3	15	33.33	26.67	40

## Sheet: Fig2D-H
Fig. 2D-H raw data
Founder pair	Total number of embryos	Cardiac ring #	Posterior fusion #	Cardiac ring embryos genotyped as wild-type #	Posterior fusion embryos genotyped as Tg(myl7:dnPI3K) #
1	30	23	7	23	6
2	29	16	13	16	13
3	27	16	11	16	11
4	29	16	13	16	13
Fig. 2D-H cumulative data
Genotype	Cardiac ring	Posterior fusion		p-value: Fisher's exact test
+/+	71	1		5.56 x 10E-31
Tg(myl7:dnPI3K)	0	43
