# Supplementary material for: The myocardium utilizes a platelet-derived growth factor receptor alpha (Pdgfra)–phosphoinositide 3-kinase (PI3K) signaling cascade to steer toward the midline during zebrafish heart tube formation
Source: eLife. 2023 Nov 3;12:e85930. doi: 10.7554/eLife.85930 (PMC10651176; doi:10.7554/eLife.85930)
Supplement: Figure 3—figure supplement 1—source data 1. [file elife-85930-fig3-figsupp1-data1.xlsx]

## Sheet: Fig 3- Fig Suppl. 1I_average
Figure 3 - Figure supplement 1I
Stage	Treatment	Average hand2 width	25th percentile	Median	75th percentile		p-values: Two sample t-test
10s	DMSO	307.879	304.637	307.99	310.538		10s	6.95e-23
	20uM LY	325.272	320.8	325.65	329		12s	3.83e-15
12s	DMSO	272.168	266.34	273.4	278.45		14s	1.5e-25
	20uM LY	307.561	295.725	309.2	319.285		16s	5.3e-30
14s	DMSO	229.427	219.3	232	236.32		18s	5.2e-30
	20uM LY	281.865	273.4	281.85	290.575		20s	3.2e-44
16s	DMSO	178.73	168.458	178.115	189.8
	20uM LY	288.199	267.4	295.7	306
18s	DMSO	86.223	76.4375	84.42	93.4125
	20uM LY	205.001	190.23	205.3	221.78
20s	DMSO	75.5497	64.525	75.985	84.82
	20uM LY	185.921	177.6	186.15	192.3

## Sheet: Fig 3- Fig Suppl. 1I_raw
Figure 3 - Figure supplement 1I
10s:				12s:				14s:				16s:				18s:				20s:
Treatment	Replicate #	hand2 width		Treatment	Replicate #	hand2 width		Treatment	Replicate #	hand2 width		Treatment	Replicate #	hand2 width		Treatment	Replicate #	hand2 width		Treatment	Replicate #	hand2 width
DMSO	1	308.2		DMSO	1	280.45		DMSO	1	243.5		DMSO	1	198.2		DMSO	1	120.34		DMSO	1	80.45
DMSO	1	315.1		DMSO	1	298.43		DMSO	1	232.67		DMSO	1	200		DMSO	1	112.3		DMSO	1	82.34
DMSO	1	304		DMSO	1	278.34		DMSO	1	235.6		DMSO	1	190		DMSO	1	85.6		DMSO	1	74.5
DMSO	1	305.4		DMSO	1	265.3		DMSO	1	234.6		DMSO	1	193.45		DMSO	1	84.34		DMSO	1	70.4
DMSO	1	302.6		DMSO	1	272.56		DMSO	1	232		DMSO	1	183.9		DMSO	1	93.2		DMSO	1	93.24
DMSO	1	304.9		DMSO	1	268.45		DMSO	1	254.7		DMSO	1	179.23		DMSO	1	79.23		DMSO	1	56.67
DMSO	1	310		DMSO	1	280.32		DMSO	1	245.34		DMSO	1	194.5		DMSO	1	76.4		DMSO	1	98.2
DMSO	1	308.2		DMSO	1	277.4		DMSO	1	213.5		DMSO	1	178.23		DMSO	1	74.5		DMSO	1	88.34
DMSO	1	300.3		DMSO	1	269.3		DMSO	1	235.6		DMSO	1	184.5		DMSO	1	84.56		DMSO	1	85.67
DMSO	1	312.4		DMSO	1	256.7		DMSO	1	236.32		DMSO	1	189.2		DMSO	1	88.2		DMSO	1	93.4
DMSO	1	309.7		DMSO	1	276.43		DMSO	1	219.3		DMSO	1	190.3		DMSO	1	104		DMSO	1	58.45
DMSO	1	301.45		DMSO	1	265.34		DMSO	1	224.5		DMSO	1	175.23		DMSO	1	75.3		DMSO	1	72.34
DMSO	1	304.6		DMSO	1	248.5		DMSO	1	229.34		DMSO	1	171		DMSO	1	102.34		DMSO	1	85.6
DMSO	2	311.85		DMSO	2	273.4		DMSO	2	227		DMSO	2	169.23		DMSO	2	67.9		DMSO	2	82.34
DMSO	2	302.9		DMSO	2	272		DMSO	2	226.7		DMSO	2	166.45		DMSO	2	89.34		DMSO	2	59.4
DMSO	2	307.1		DMSO	2	284.3		DMSO	2	243.9		DMSO	2	178		DMSO	2	84.5		DMSO	2	73.45
DMSO	2	311.9		DMSO	2	260.34		DMSO	2	217.34		DMSO	2	162.4		DMSO	2	76.7		DMSO	2	75.67
DMSO	2	304.65		DMSO	2	279.3		DMSO	2	220		DMSO	2	193		DMSO	2	80		DMSO	2	79.2
DMSO	2	305.9		DMSO	2	273		DMSO	2	215.67		DMSO	2	192.4		DMSO	2	82.45		DMSO	2	80
DMSO	2	312.43		DMSO	2	275.32		DMSO	2	238		DMSO	2	185.2		DMSO	2	84.5		DMSO	2	84.56
DMSO	2	308.56		DMSO	2	256.45		DMSO	2	240.6		DMSO	2	189.2		DMSO	2	76.45		DMSO	2	58
DMSO	2	305.46		DMSO	2	259.4		DMSO	2	232		DMSO	2	174.5		DMSO	2	78		DMSO	2	86.78
DMSO	2	309.34		DMSO	2	263.56		DMSO	3	223		DMSO	3	150.56		DMSO	2	73.24		DMSO	2	91.23
DMSO	2	308.5		DMSO	3	268.4		DMSO	3	234.7		DMSO	3	159.23		DMSO	3	103.4		DMSO	3	83.34
DMSO	3	308.6		DMSO	3	269.4		DMSO	3	236.7		DMSO	3	164.5		DMSO	3	105		DMSO	3	60.23
DMSO	3	310.1		DMSO	3	283		DMSO	3	212.6		DMSO	3	172.4		DMSO	3	98.7		DMSO	3	72.23
DMSO	3	303.45		DMSO	3	274.67		DMSO	3	210		DMSO	3	176.23		DMSO	3	93.45		DMSO	3	65.2
DMSO	3	307.78		DMSO	3	278.56		DMSO	3	235.67		DMSO	3	175.6		DMSO	3	86.34		DMSO	3	62.5
DMSO	3	304.9		DMSO	3	267.34		DMSO	3	228.9		DMSO	3	162.3		DMSO	3	75.67		DMSO	3	78.23
DMSO	3	307.2		DMSO	3	282.4		DMSO	3	214.5		DMSO	3	187.23		DMSO	3	79.2		DMSO	3	60.23
DMSO	3	303.34		DMSO	3	275.67		DMSO	3	218		DMSO	3	168.2		DMSO	3	73.4		DMSO	3	59
DMSO	3	312.56		DMSO	3	273.5		20uM LY	1	287.5		DMSO	3	165		DMSO	3	93.4		DMSO	3	65.6
DMSO	3	315.6		DMSO	3	274		20uM LY	1	298.45		20uM LY	1	310.6		DMSO	3	80.3		DMSO	3	75.6
DMSO	3	318.9		20uM LY	1	296		20uM LY	1	300		20uM LY	1	290.46		DMSO	3	69.34		DMSO	3	76.3
20uM LY	1	325.7		20uM LY	1	295.45		20uM LY	1	274.56		20uM LY	1	267.4		20uM LY	1	240.34		20uM LY	1	210.45
20uM LY	1	321.9		20uM LY	1	304.2		20uM LY	1	280.3		20uM LY	1	325.8		20uM LY	1	234.5		20uM LY	1	190.34
20uM LY	1	328.6		20uM LY	1	312.4		20uM LY	1	279.4		20uM LY	1	306		20uM LY	1	221.78		20uM LY	1	192.3
20uM LY	1	327.5		20uM LY	1	287.4		20uM LY	1	287.4		20uM LY	1	247.8		20uM LY	1	210.45		20uM LY	1	180.34
20uM LY	1	319		20uM LY	1	319.34		20uM LY	1	298.4		20uM LY	1	267.4		20uM LY	1	190.23		20uM LY	1	186.7
20uM LY	1	329.4		20uM LY	1	307.78		20uM LY	1	276.8		20uM LY	1	276.1		20uM LY	1	195.23		20uM LY	1	188.21
20uM LY	1	330.23		20uM LY	1	310.34		20uM LY	1	292.3		20uM LY	1	253.4		20uM LY	1	180.2		20uM LY	1	202.34
20uM LY	1	318.34		20uM LY	1	325.7		20uM LY	1	290		20uM LY	1	252		20uM LY	1	219.34		20uM LY	1	179.23
20uM LY	1	321.56		20uM LY	1	280.45		20uM LY	2	285.1		20uM LY	1	272.34		20uM LY	1	205.3		20uM LY	1	172.34
20uM LY	1	323.9		20uM LY	2	324.56		20uM LY	2	274.9		20uM LY	1	264.5		20uM LY	1	239.4		20uM LY	1	195.6
20uM LY	1	325.6		20uM LY	2	318.9		20uM LY	2	272		20uM LY	1	279		20uM LY	2	237		20uM LY	2	198.23
20uM LY	1	323.5		20uM LY	2	310.34		20uM LY	2	287.6		20uM LY	2	306.9		20uM LY	2	194.56		20uM LY	2	205.6
20uM LY	2	319.23		20uM LY	2	321.4		20uM LY	2	283.4		20uM LY	2	304.7		20uM LY	2	183.4		20uM LY	2	180.23
20uM LY	2	320.5		20uM LY	2	319.34		20uM LY	2	290		20uM LY	2	263.4		20uM LY	2	179.5		20uM LY	2	185.6
20uM LY	2	331.23		20uM LY	2	325.67		20uM LY	2	276.2		20uM LY	2	289.1		20uM LY	2	205.6		20uM LY	2	180.23
20uM LY	2	319.3		20uM LY	2	328.4		20uM LY	2	294		20uM LY	2	308.5		20uM LY	2	209.45		20uM LY	2	170.34
20uM LY	2	317.2		20uM LY	2	290.45		20uM LY	2	265.9		20uM LY	2	305		20uM LY	2	222.3		20uM LY	2	187.3
20uM LY	2	321.4		20uM LY	2	287.3		20uM LY	2	273.4		20uM LY	2	293.5		20uM LY	2	212.56		20uM LY	2	178.2
20uM LY	2	320.6		20uM LY	2	289.45		20uM LY	3	298.12		20uM LY	2	304.6		20uM LY	2	175.9		20uM LY	2	176.3
20uM LY	2	334.2		20uM LY	3	278.45		20uM LY	3	295.9		20uM LY	2	317.8		20uM LY	2	180.34		20uM LY	3	192.3
20uM LY	2	325.6		20uM LY	3	317.3		20uM LY	3	276.12		20uM LY	2	309.2		20uM LY	2	193.4		20uM LY	3	190
20uM LY	2	329.1		20uM LY	3	304.78		20uM LY	3	290		20uM LY	3	297.9		20uM LY	3	190.3		20uM LY	3	176.45
20uM LY	2	328.4		20uM LY	3	309.2		20uM LY	3	273.4		20uM LY	3	243.6		20uM LY	3	205.6		20uM LY	3	172.3
20uM LY	3	327.5		20uM LY	3	306.23		20uM LY	3	265.3		20uM LY	3	304.5		20uM LY	3	232.5		20uM LY	3	187.23
20uM LY	3	329.7		20uM LY	3	305		20uM LY	3	262.4		20uM LY	3	299.4		20uM LY	3	243.5		20uM LY	3	184.5
20uM LY	3	329		20uM LY	3	306.21		20uM LY	3	267.1		20uM LY	3	308.9		20uM LY	3	180.34		20uM LY	3	193.4
20uM LY	3	323.98		20uM LY	3	319.23		20uM LY	3	260		20uM LY	3	303.2		20uM LY	3	195.6		20uM LY	3	172.34
20uM LY	3	327.45		20uM LY	3	318						20uM LY	3	280.45		20uM LY	3	199.3		20uM LY	3	177.4
20uM LY	3	329										20uM LY	3	305.7		20uM LY	3	201
20uM LY	3	328.54										20uM LY	3	306		20uM LY	3	215.6
20uM LY	3	334.23										20uM LY	3	273.4		20uM LY	3	160.5
20uM LY	3	317.3										20uM LY	3	260.2
