# Supplementary material for: The myocardium utilizes a platelet-derived growth factor receptor alpha (Pdgfra)–phosphoinositide 3-kinase (PI3K) signaling cascade to steer toward the midline during zebrafish heart tube formation
Source: eLife. 2023 Nov 3;12:e85930. doi: 10.7554/eLife.85930 (PMC10651176; doi:10.7554/eLife.85930)
Supplement: Figure 3—figure supplement 2—source data 1. [file elife-85930-fig3-figsupp2-data1.xlsx]

## Sheet: Fig 3- Fig Suppl. 2C_average
Figure 3 - Figure supplement 2C
							p-values: Two-way anova
			Mean	SEM			DMSO 0-49min vs. LY 0-49min	0.0291	yes
Average Speed	Early movement	DMSO	0.5119	0.026			DMSO 0-49min vs. DMSO 49-99min	0.5756	no
		20uM LY	0.3824	0.032			DMSO 0-49min vs. LY 49-99min	0.0026	yes
	Posterior fusion	DMSO	0.5793	0.029			DMSO 0-49min vs. DMSO 99-153min	0.5676	no
		20uM LY	0.3441	0.023			DMSO 0-49min vs. LY 99-153min	0.0001	yes
	Anterior fusion	DMSO	0.4439	0.025			LY 0-49min vs. DMSO 49-99min	0.0004	yes
		20uM LY	0.261	0.026			LY 0-49min vs. LY 49-99min	0.9053	no
							LY 0-49min vs. DMSO 99-153min	0.6259	no
							LY 0-49min vs. LY 99-153min	0.0328	yes
							DMSO 49-99min vs. LY 49-99min	0.0001	yes
							DMSO 49-99min vs. DMSO 99-153min	0.0286	yes
							DMSO 49-99min vs. LY 99-153min	0.0001	yes
							LY 49-99min vs. DMSO 99-153min	0.1466	no
							LY 49-99min vs. LY 99-153min	0.2592	no
							DMSO 99-153min vs. LY 99-153min	0.001	yes

## Sheet: Fig 3- Fig Suppl. 2C_raw
Figure 3 - Figure supplement 2C
Average Speed:
Treatment	Embryo #	Cell #	Early movement	Posterior fusion	Anterior fusion
DMSO	1	1	0.561918	0.53994	0.436833
DMSO	1	2	0.573408	0.3964	0.327148
DMSO	1	3	0.541204	0.47062	0.296481
DMSO	1	4	0.687143	0.70876	0.285648
DMSO	1	5	0.745837	0.55046	0.305667
DMSO	1	6	0.630347	0.52678	0.291815
DMSO	1	7	0.536347	0.73392	0.444185
DMSO	1	8	0.509959	0.39998	0.362648
DMSO	1	9	0.544204	0.40546	0.7562
DMSO	1	10	0.694592	0.58374	0.49637
DMSO	1	11	0.647	0.5283	0.300704
DMSO	1	12	0.49402	0.46858	0.456
DMSO	1	13	0.463633	0.5457	0.5595
DMSO	1	14	0.487163	0.48946	0.362926
DMSO	1	15	0.376245	0.545	0.338019
DMSO	1	16	0.737347	0.6045	0.315407
DMSO	1	17	0.667551	0.49472	0.389796
DMSO	1	18	0.390857	0.57106	0.598389
DMSO	1	19	0.604469	0.8243	0.519574
DMSO	2	1	0.39851	0.5726	0.30287
DMSO	2	2	0.494714	0.53236	0.425296
DMSO	2	3	0.310061	0.54018	0.49513
DMSO	2	4	0.430163	0.56316	0.488815
DMSO	2	5	0.427249	0.59838	0.539722
DMSO	2	6	0.352061	0.53418	0.552278
DMSO	2	7	0.282551	0.75286	0.587481
DMSO	2	8	0.380122	0.5216	0.57413
DMSO	2	9	0.352224	0.71594	0.797722
DMSO	2	10	0.326122	0.54372	0.505667
DMSO	2	11	0.784265	0.60772	0.614833
DMSO	2	12	0.543633	0.6009	0.36937
DMSO	2	13	0.544959	0.522	0.488111
DMSO	2	14	0.548143	0.67436	0.502574
DMSO	2	15	0.609735	0.64948	0.316333
DMSO	2	16	0.548918	0.64678	0.5795
DMSO	2	17	0.50702	0.80022	0.398222
DMSO	2	18	0.549694	0.6246	0.566463
DMSO	2	19	0.362735	0.58592	0.505389
DMSO	2	20	0.573184	0.67058	0.450704
DMSO	3	1	0.627673	0.6109	0.702093
DMSO	3	2	0.588	0.57522	0.614407
DMSO	3	3	0.399959	0.59248	0.500389
DMSO	3	4	0.458796	0.4451	0.575093
DMSO	3	5	0.555612	0.46836	0.453667
DMSO	3	6	0.476367	0.4416	0.500037
DMSO	3	7	0.341531	0.45032	0.5045
DMSO	3	8	0.492837	0.57832	0.49413
DMSO	3	9	0.34102	0.296	0.463037
DMSO	3	10	0.427673	0.55916	0.387537
DMSO	3	11	0.430449	0.38426	0.360759
DMSO	3	12	0.377143	0.59188	0.68087
DMSO	3	13	0.301367	0.4196	0.541852
DMSO	3	14	0.505163	0.40722	0.460889
DMSO	3	15	0.479367	0.46314	0.45233
DMSO	3	16	0.521449	0.50376	0.5402
DMSO	3	17	0.567816	0.45084	0.317611
DMSO	3	18	0.305224	0.4486	0.361815
DMSO	3	19	0.384429	0.33726	0.490333
DMSO	3	20	0.266612	0.5707	0.63237
DMSO	3	21	0.502918	0.43718	0.531259
DMSO	4	1	0.439837	0.76704	0.451224
DMSO	4	2	0.409184	0.65244	0.468076
DMSO	4	3	0.48502	0.68542	0.38215
DMSO	4	4	0.429918	0.65564	0.270039
DMSO	4	5	0.443612	0.68888	0.35598
DMSO	4	6	0.574551	0.61712	0.215687
DMSO	4	7	0.584	0.6381	0.25778
DMSO	4	8	0.506122	0.65242	0.88898
DMSO	4	9	0.571286	0.64782	0.250669
DMSO	4	10	0.438367	0.70686	0.243854
DMSO	4	11	0.514265	0.76718	0.248391
DMSO	4	12	0.755041	0.76558	0.54241
DMSO	4	13	0.506122	0.38414	0.442224
DMSO	4	14	0.527612	0.5836	0.456632
DMSO	4	15	0.408163	0.4966	0.330169
DMSO	4	16	0.480388	0.642	0.268502
DMSO	4	17	0.46598	0.47452	0.379484
DMSO	5	1	0.512367	0.5938	0.31478
DMSO	5	2	0.414122	0.4673	0.289002
DMSO	5	3	0.577592	0.60412	0.334243
DMSO	5	4	0.655163	0.60122	0.503595
DMSO	5	5	0.610959	0.57904	0.588947
DMSO	5	6	0.611184	0.61684	0.549113
DMSO	5	7	0.524959	0.7804	0.481743
DMSO	5	8	0.62098	0.8026	0.597261
DMSO	5	9	0.627041	0.48798	0.520132
DMSO	5	10	0.692531	0.65316	0.396687
DMSO	5	11	0.723571	0.72748	0.475761
DMSO	5	12	0.647388	0.694	0.45065
DMSO	5	13	0.70751	0.74908	0.487947
DMSO	5	14	0.530367	0.52746	0.198836
DMSO	5	15	0.34451	0.68426	0.462928
DMSO	5	16	0.426714	0.808	0.304428
DMSO	5	17	0.490041	0.45896	0.240484
DMSO	5	18	0.388061	0.39694	0.373947
DMSO	5	19	0.763184	0.59506	0.424799
20uM LY	1	1	0.288449	0.28704	0.191537
20uM LY	1	2	0.213	0.33388	0.227111
20uM LY	1	3	0.381184	0.27138	0.236167
20uM LY	1	4	0.270551	0.34014	0.202389
20uM LY	1	5	0.1862	0.33882	0.257981
20uM LY	1	6	0.39449	0.27692	0.293926
20uM LY	1	7	0.205673	0.4394	0.267556
20uM LY	1	8	0.178776	0.38814	0.22263
20uM LY	1	9	0.264163	0.51718	0.201852
20uM LY	1	10	0.242918	0.35922	0.201
20uM LY	1	11	0.282673	0.32012	0.296833
20uM LY	1	12	0.361633	0.2103	0.390185
20uM LY	1	13	0.331796	0.32016	0.268796
20uM LY	1	14	0.350592	0.3744	0.320315
20uM LY	1	15	0.294816	0.34314	0.340093
20uM LY	1	16	0.217245	0.3095	0.283796
20uM LY	1	17	0.327143	0.2999	0.195685
20uM LY	1	18	0.234265	0.3516	0.279185
20uM LY	1	19	0.212837	0.44582	0.418556
20uM LY	1	20	0.255531	0.43816	0.328667
20uM LY	2	1	0.295571	0.299	0.381241
20uM LY	2	2	0.357429	0.3093	0.321481
20uM LY	2	3	0.354286	0.28242	0.273759
20uM LY	2	4	0.405939	0.46064	0.317093
20uM LY	2	5	0.347082	0.47682	0.415907
20uM LY	2	6	0.465776	0.40712	0.472315
20uM LY	2	7	0.437367	0.42996	0.28463
20uM LY	2	8	0.459469	0.43256	0.397537
20uM LY	2	9	0.549571	0.56306	0.411963
20uM LY	2	10	0.477408	0.61494	0.47337
20uM LY	2	11	0.441163	0.493	0.473426
20uM LY	2	12	0.449837	0.45382	0.32987
20uM LY	2	13	0.569878	0.5088	0.431741
20uM LY	2	14	0.387327	0.49472	0.409759
20uM LY	2	15	0.367388	0.4596	0.363981
20uM LY	2	16	0.334367	0.43812	0.351111
20uM LY	2	17	0.350816	0.40832	0.289444
20uM LY	2	18	0.435612	0.40734	0.36613
20uM LY	2	19	0.362102	0.43242	0.405685
20uM LY	3	1	0.185429	0.25732	0.211778
20uM LY	3	2	0.318449	0.25972	0.142219
20uM LY	3	3	0.337	0.33654	0.140848
20uM LY	3	4	0.406918	0.2967	0.190756
20uM LY	3	5	0.292224	0.24962	0.183107
20uM LY	3	6	0.314306	0.31528	0.157478
20uM LY	3	7	0.377224	0.42314	0.173848
20uM LY	3	8	0.34602	0.40548	0.262385
20uM LY	3	9	0.189347	0.31574	0.2197
20uM LY	3	10	0.18551	0.2477	0.220033
20uM LY	3	11	0.231959	0.474	0.134663
20uM LY	3	12	0.274755	0.2508	0.147256
20uM LY	3	13	0.334571	0.2677	0.111793
20uM LY	3	14	0.401408	0.25144	0.153793
20uM LY	3	15	0.379408	0.20896	0.195348
20uM LY	3	16	0.484898	0.15684	0.134219
20uM LY	3	17	0.332592	0.45892	0.328756
20uM LY	3	18	0.484898	0.32234	0.137774
20uM LY	3	19	0.427939	0.19506	0.24457
20uM LY	3	20	0.417143	0.222	0.217885
20uM LY	3	21	0.29898	0.13082	0.214019
20uM LY	4	1	0.345224	0.19046	0.166111
20uM LY	4	2	0.240449	0.25006	0.136259
20uM LY	4	3	0.200245	0.13944	0.107722
20uM LY	4	4	0.546592	0.22344	0.10963
20uM LY	4	5	0.332122	0.13514	0.299407
20uM LY	4	6	0.279163	0.18374	0.166667
20uM LY	4	7	0.312143	0.21198	0.136259
20uM LY	4	8	0.475612	0.36924	0.165167
20uM LY	4	9	0.384694	0.26106	0.220019
20uM LY	4	10	0.464429	0.33814	0.133574
20uM LY	4	11	0.507878	0.3821	0.327944
20uM LY	4	12	0.701449	0.4956	0.403741
20uM LY	4	13	0.564592	0.66176	0.426537
20uM LY	4	14	0.694898	0.43286	0.2
20uM LY	4	15	0.178612	0.10694	0.42863
20uM LY	4	16	0.380082	0.26696	0.183222
20uM LY	4	17	0.477776	0.15254	0.223481
20uM LY	4	18	0.502837	0.37578	0.269444
20uM LY	4	19	0.407143	0.68334	0.502648
20uM LY	4	20	0.432265	0.53498	0.425315
20uM LY	5	1	0.51651	0.44456	0.394574
20uM LY	5	2	0.551184	0.46122	0.314796
20uM LY	5	3	0.407102	0.50084	0.318
20uM LY	5	4	0.576388	0.3092	0.222648
20uM LY	5	5	0.564694	0.7055	0.401204
20uM LY	5	6	0.416245	0.3561	0.174685
20uM LY	5	7	0.520429	0.3685	0.176463
20uM LY	5	8	0.416245	0.3561	0.174685
20uM LY	5	9	0.520429	0.3685	0.176463
20uM LY	5	10	0.509796	0.24092	0.32313
20uM LY	5	11	0.582531	0.25366	0.310093
20uM LY	5	12	0.676633	0.42734	0.207019
20uM LY	5	13	0.605837	0.27048	0.355648
20uM LY	5	14	0.650245	0.24122	0.309426
20uM LY	5	15	0.536816	0.53372	0.379926
20uM LY	5	16	0.571388	0.38218	0.198889
20uM LY	5	17	0.573	0.20702	0.235185
20uM LY	5	18	0.282265	0.39954	0.265611
20uM LY	5	19	0.359306	0.37302	0.129481
20uM LY	5	20	0.417878	0.35756	0.141315
20uM LY	5	21	0.462429	0.2115	0.155463
20uM LY	5	22	0.348816	0.43772	0.119815
20uM LY	6	1	0.460122	0.27306	0.153444
20uM LY	6	2	0.508	0.25548	0.295463
20uM LY	6	3	0.560612	0.4174	0.16
20uM LY	6	4	0.449367	0.36182	0.397593
20uM LY	6	5	0.567143	0.43846	0.252796
20uM LY	6	6	0.292592	0.2034	0.164759
20uM LY	6	7	0.238837	0.24738	0.113241
20uM LY	6	8	0.19249	0.4118	0.252278
20uM LY	6	9	0.188592	0.34636	0.229981
20uM LY	6	10	0.220714	0.30132	0.37963
20uM LY	6	11	0.555306	0.33134	0.231407
20uM LY	6	12	0.287816	0.27992	0.210111
20uM LY	6	13	0.363429	0.35088	0.204648
20uM LY	6	14	0.276184	0.39836	0.360944
20uM LY	6	15	0.264633	0.23466	0.267389
20uM LY	6	16	0.258082	0.24942	0.191833
20uM LY	6	17	0.343265	0.33786	0.161352
20uM LY	6	18	0.464388	0.2118	0.234519
20uM LY	6	19	0.286633	0.23182	0.228574
20uM LY	6	20	0.219204	0.21966	0.200148
20uM LY	6	21	0.276184	0.21762	0.192556
20uM LY	6	22	0.362265	0.26158	0.221833
20uM LY	6	23	0.370796	0.20736	0.173296

## Sheet: Fig 3- Fig Suppl. 2D_average
Figure 3 - Figure supplement 2D
			Mean	SEM			p-values: Two-way anova
Average Direction	Early movement	DMSO	30.07	4.82			DMSO 0-49min vs. LY 0-49min	0.0195
		20uM LY	44.95	2.36			DMSO 0-49min vs. DMSO 49-99min	0.9672
	Posterior fusion	DMSO	33.6	3.47			DMSO 0-49min vs. LY 49-99min	0.1396
		20uM LY	41.09	2.18			DMSO 0-49min vs. DMSO 99-153min	0.6805
	Anterior fusion	DMSO	36.69	3.18			DMSO 0-49min vs. LY 99-153min	0.2901
		20uM LY	39.31	2.08			LY 0-49min vs. DMSO 49-99min	0.1194
							LY 0-49min vs. LY 49-99min	0.9304
							LY 0-49min vs. DMSO 99-153min	0.4071
							LY 0-49min vs. LY 99-153min	0.7378
							DMSO 49-99min vs. LY 49-99min	0.4143
							DMSO 49-99min vs. DMSO 99-153min	0.9816
							DMSO 49-99min vs. LY 99-153min	0.7642
							LY 49-99min vs. DMSO 99-153min	0.9048
							LY 49-99min vs. LY 99-153min	0.9978
							DMSO 99-153min vs. LY 99-153min	0.9891

## Sheet: Fig 3- Fig Suppl. 2D_raw
Figure 3 - Figure supplement 2D
Average Direction:
Treatment	Embryo #	Cell #	Early movement	Posterior fusion	Anterior fusion
DMSO	1	1	16.369	65.48	57.2908
DMSO	1	2	40.104	65.48	64.4569
DMSO	1	3	57.29	50.142	65.39
DMSO	1	4	33.5877	52.67	65.39
DMSO	1	5	48.8072	68.7611	28.6475
DMSO	1	6	40.11	57.295	19.0957
DMSO	1	7	43.6567	37.0705	41.6691
DMSO	1	8	62.0755	21.4856	57.2849
DMSO	1	9	36.8325	65.4	16.23
DMSO	1	10	27.22	42.9771	6.36582
DMSO	1	11	65.36	26.0432	15.2774
DMSO	1	12	65.42	26.04	36.8375
DMSO	1	13	17.66	2.72833	1.97561
DMSO	1	14	57.295	11.4576	15.6259
DMSO	1	15	63.6524	31.033	45.836
DMSO	1	16	69.7498	40.82	6.7401
DMSO	1	17	59.67	40.82	8.18452
DMSO	1	18	20.4607	66.8559	14.3256
DMSO	1	19	54.1122	38.9587	80.2201
DMSO	2	1	50.9289	26.4468	40.82
DMSO	2	2	57.295	26.4438	57.2833
DMSO	2	3	57.295	21.4856	32.7371
DMSO	2	4	9.54819	57.295	32.73
DMSO	2	5	57.295	22.918	20.2203
DMSO	2	6	57.295	25.069	57.295
DMSO	2	7	19.1101	22.2799	38.1944
DMSO	2	8	19.11	19.0964	8.81378
DMSO	2	9	28.6475	22.9161	29.5166
DMSO	2	10	32.74	68.7371	15.2834
DMSO	2	11	31.6121	72.58	25.4684
DMSO	2	12	15.0767	36.75	13.2207
DMSO	2	13	10.4167	5.503	36.4564
DMSO	2	14	2.86457	21.1087	4.4123
DMSO	2	15	17.4397	14.3227	57.295
DMSO	2	16	34.377	36.8343	53.9208
DMSO	2	17	10.4167	33.7029	17.9033
DMSO	2	18	8.18452	39.3903	11.4581
DMSO	2	19	5.51	20.2244	10.742
DMSO	2	20	0.0830141	0.0188668	0.0172946
DMSO	3	1	14.3255	26.738	54.6879
DMSO	3	2	9.54784	45.0186	45.2345
DMSO	3	3	35.8127	14.326	72.9191
DMSO	3	4	26.738	65.41	28.6475
DMSO	3	5	3.18239	24.5653	44.0756
DMSO	3	6	16.3722	24.56	35.2572
DMSO	3	7	20.8298	19.0983	25.0671
DMSO	3	8	3.18661	11.4561	6.74009
DMSO	3	9	26.4443	28.6475	13.4802
DMSO	3	10	1.47647	9.04538	8.18353
DMSO	3	11	42.9724	57.2232	8.18
DMSO	3	12	11.4576	83.3417	35.8097
DMSO	3	13	66.8422	16.86	61.3868
DMSO	3	14	66.84	78.7862	64.4558
DMSO	3	15	11.4576	65.4785	85.9425
DMSO	3	16	11.45	31.2548	33.01
DMSO	3	17	6.87724	4.77408	16.15
DMSO	3	18	47.7468	8.115	5.47
DMSO	3	19	26.0467	50.1342	8.18353
DMSO	3	20	57.295	60.6648	57.295
DMSO	3	21	25.0671	71.77	66.8422
DMSO	4	1	17.6276	17.1887	15.59
DMSO	4	2	19.0964	18.3354	65.41
DMSO	4	3	7.16132	32.3837	40.79
DMSO	4	4	15.6242	11.4579	91.56
DMSO	4	5	16.8544	2.39	65.33
DMSO	4	6	61.7019	15.6283	11.4562
DMSO	4	7	45.8339	25.4666	8.18355
DMSO	4	8	39.3917	4.77409	8.18
DMSO	4	9	50.1337	17.1874	57.2596
DMSO	4	10	50.13	20.8322	45.8502
DMSO	4	11	88.1432	23.4394	45.85
DMSO	4	12	69.3601	23.64	67.4002
DMSO	4	13	51.5662	73.45	57.2849
DMSO	4	14	3.3698	40.79	78.14
DMSO	4	15	11.4576	40.79	90.035
DMSO	4	16	7.6387	8.115	57.295
DMSO	4	17	31.8306	8.115	6.73961
DMSO	5	1	26.7402	19.122	6.73
DMSO	5	2	38.1993	46.31	14.3304
DMSO	5	3	7.71	23.8764	42.9712
DMSO	5	4	14.8555	48.4812	35.0151
DMSO	5	5	2.20344	33.4186	29.8929
DMSO	5	6	4.24369	47.7468	22.9166
DMSO	5	7	17.9077	54.1161	45.2307
DMSO	5	8	5.45602	49.1105	63.0238
DMSO	5	9	21.4864	32.7501	27.2835
DMSO	5	10	14.3223	42.0176	42.969
DMSO	5	11	23.3429	28.6475	27.2835
DMSO	5	12	27.1399	22.9201	39.662
DMSO	5	13	29.7933	16.18	72.9192
DMSO	5	14	10.96	14.3226	72.91
DMSO	5	15	40.78	80.2102	39.3917
DMSO	5	16	40.78	70.0255	5.7295
DMSO	5	17	3.09	0	47.7478
DMSO	5	18	11.007	31.8262	3.11
DMSO	5	19	1.4	5.49	52.8881
20uM LY	1	1	66.8422	24.5506	57.295
20uM LY	1	2	57.295	57.295	8.07
20uM LY	1	3	8.08	73.45	21.4822
20uM LY	1	4	8.08	65.38	0
20uM LY	1	5	14.3192	57.307	11.4561
20uM LY	1	6	42.9728	16.15	9.54717
20uM LY	1	7	28.6415	85.9605	8.16
20uM LY	1	8	19.0983	88.33	85.9425
20uM LY	1	9	24.5506	3.34	85.9425
20uM LY	1	10	24.5506	79.73	14.3192
20uM LY	1	11	57.304	85.9425	81.5
20uM LY	1	12	61.114	19.1103	11.0074
20uM LY	1	13	76.86	22.47	38.2087
20uM LY	1	14	42.46	36.77	44.84
20uM LY	1	15	31.04	57.295	20.4425
20uM LY	1	16	77.86	65.55	28.6511
20uM LY	1	17	91.6634	57.3094	73.81
20uM LY	1	18	49.1012	50.1343	1.6635
20uM LY	1	19	38.2207	50.1343	8.26
20uM LY	1	20	65.44	28.6439	82.7639
20uM LY	2	1	17.6314	28.6595	14.3207
20uM LY	2	2	36.4628	28.652	68.7511
20uM LY	2	3	55.87	21.4913	28.643
20uM LY	2	4	28.6498	15.2764	53.7132
20uM LY	2	5	10.4131	15.2764	13.4799
20uM LY	2	6	64.458	38.1967	57.295
20uM LY	2	7	65.41	26.7396	22.9209
20uM LY	2	8	57.2898	38.1987	50.136
20uM LY	2	9	29.58	79.5715	57.295
20uM LY	2	10	58.23	53.9199	47.7479
20uM LY	2	11	8.144	57.295	38.1967
20uM LY	2	12	68.7569	53.2018	14.3226
20uM LY	2	13	68.754	57.16	8.38
20uM LY	2	14	8.12	57.023	58.23
20uM LY	2	15	3.34	57.023	40.78
20uM LY	2	16	53.94	57.023	14.8
20uM LY	2	17	35.26	8.28	40.99
20uM LY	2	18	54.47	2.16	32.53
20uM LY	2	19	43.93	2.15	17.66
20uM LY	3	1	43.93	2.15	90.0306
20uM LY	3	2	12.04	85.9062	16.4
20uM LY	3	3	71.621	51.08	16.3
20uM LY	3	4	78.144	65.39	16.3
20uM LY	3	5	66.8462	14.3283	47.7438
20uM LY	3	6	70.0209	8.04	15.86
20uM LY	3	7	65.419	73.6738	3.09
20uM LY	3	8	46.327	71.6203	49.03
20uM LY	3	9	28.6475	35.0172	32.66
20uM LY	3	10	28.6475	63.6647	56.215
20uM LY	3	11	35.8082	43.8111	5.48
20uM LY	3	12	42.0135	19.0983	65.41
20uM LY	3	13	22.0361	36.74	36.74
20uM LY	3	14	10.1111	47.7518	57.295
20uM LY	3	15	14.3226	11.4504	26.042
20uM LY	3	16	6.73984	7.16525	28.6565
20uM LY	3	17	51.05	39.95	21.73
20uM LY	3	18	53.244	1.67	85.9065
20uM LY	3	19	77.78	63.0274	8.115
20uM LY	3	20	83.34	40.603	25.116
20uM LY	3	21	76.87	40.603	39.926
20uM LY	4	1	71.6165	40.063	40.575
20uM LY	4	2	71.0458	57.3015	71.6278
20uM LY	4	3	7.16525	11.4648	14.3305
20uM LY	4	4	28.6475	36.447	8.72
20uM LY	4	5	57.295	28.6655	8.72
20uM LY	4	6	10.0913	57.3095	0
20uM LY	4	7	57.2053	36.76	57.295
20uM LY	4	8	50.4657	68.7554	57.295
20uM LY	4	9	72.34	69.46	28.6475
20uM LY	4	10	83.1957	73.665	46.33
20uM LY	4	11	27.46	57.295	44.91
20uM LY	4	12	17.45	49.01	65.61
20uM LY	4	13	7.53	18.118	89.79
20uM LY	4	14	8.42	2.55	90.32
20uM LY	4	15	57.195	8.36	40.84
20uM LY	4	16	26.4003	35.2529	40.82
20uM LY	4	17	20.5912	35.25	40.925
20uM LY	4	18	21.7899	24.49	65.61
20uM LY	4	19	46.55	9.059	46.03
20uM LY	4	20	66.7285	39.3734	15.25
20uM LY	5	1	83.8882	69.47	15.25
20uM LY	5	2	37.01	36.75	26.49
20uM LY	5	3	56.08	31.28	46.29
20uM LY	5	4	27.6101	8.12	65.655
20uM LY	5	5	87.9953	12.19	17.85
20uM LY	5	6	40.4425	0	0
20uM LY	5	7	25.7806	5.73058	14.3327
20uM LY	5	8	76.388	57.3053	53.95
20uM LY	5	9	5.49	59.91	89.1158
20uM LY	5	10	61	65.41	65.4873
20uM LY	5	11	77.69	74.95	40.78
20uM LY	5	12	42.49	78.13	90.0438
20uM LY	5	13	54.2771	36.76	61.47
20uM LY	5	14	62.5013	41.6697	46.35
20uM LY	5	15	60.3091	19.0864	8.115
20uM LY	5	16	35.8105	42.969	7.16749
20uM LY	5	17	63.0295	35.0125	16.08
20uM LY	5	18	64.4625	13.4837	16.08
20uM LY	5	19	83.3394	76.4093	8.04
20uM LY	5	20	50.132	46.29	57.2232
20uM LY	5	21	53.7157	8.04	57.22
20uM LY	5	22	75.2002	36.73	57.22
20uM LY	6	1	60.63	16.49	8.15
20uM LY	6	2	38.1947	83.75	69.5721
20uM LY	6	3	61.47	32.56	12.91
20uM LY	6	4	5	65.41	57.295
20uM LY	6	5	71.6365	57.295	28.6475
20uM LY	6	6	85.978	0	28.64
20uM LY	6	7	0	57.3051	19.0905
20uM LY	6	8	38.1967	57.305	57.2808
20uM LY	6	9	64.402	57.305	40.82
20uM LY	6	10	9.55409	8.185	85.9425
20uM LY	6	11	36.4628	32.7342	22.9322
20uM LY	6	12	73.525	46.32	36.8343
20uM LY	6	13	35.8094	8.115	81.78
20uM LY	6	14	31.2547	65.433	81.78
20uM LY	6	15	8.81378	8.18355	42.989
20uM LY	6	16	66.1088	28.6475	65.48
20uM LY	6	17	22.9152	76.3933	46.288
20uM LY	6	18	22.9152	65.41	41.065
20uM LY	6	19	25.4688	8.044	46.288
20uM LY	6	20	45.8369	16.23	46.288
20uM LY	6	21	57.3021	65.38	36.72
20uM LY	6	22	42.27	65.38	57.2861
20uM LY	6	23	61.3871	57.295	71.6188

## Sheet: Fig 3- Fig Suppl. 2E_average
Figure 3 - Figure supplement 2E
		Mean	SEM		p-values: Two-tailed t-test
Average absolute Velocity along medial-lateral axis	DMSO	0.3548	0.027		0.0008
	20uM LY	0.1716	0.018

## Sheet: Fig 3- Fig Suppl. 2E_raw
Figure 3 - Figure supplement 2E
Treatment	Embryo #	Cell #	Medial-lateral velocity
DMSO	1	1	0.6954
DMSO	1	2	0.4623
DMSO	1	3	0.2354
DMSO	1	4	0.2433
DMSO	1	5	0.5423
DMSO	1	6	0.9322
DMSO	1	7	0.2354
DMSO	1	8	0.2317
DMSO	1	9	0.5643
DMSO	1	10	0.2352
DMSO	1	11	0.69522
DMSO	1	12	0.26432
DMSO	1	13	0.29654
DMSO	1	14	0.3123
DMSO	1	15	0.2867
DMSO	1	16	0.7123
DMSO	1	17	0.3456
DMSO	1	18	0.8234
DMSO	1	19	0.4323
DMSO	2	1	0.5423
DMSO	2	2	0.5421
DMSO	2	3	0.2894
DMSO	2	4	0.4156
DMSO	2	5	0.3289
DMSO	2	6	0.3124
DMSO	2	7	0.147
DMSO	2	8	0.1856
DMSO	2	9	0.463245
DMSO	2	10	0.6234
DMSO	2	11	0.2189
DMSO	2	12	0.3456
DMSO	2	13	0.3854
DMSO	2	14	0.297
DMSO	2	15	0.2176
DMSO	2	16	0.3214
DMSO	2	17	0.2134
DMSO	2	18	0.1567
DMSO	2	19	0.2167
DMSO	2	20	0.46547
DMSO	3	1	0.297
DMSO	3	2	0.28551
DMSO	3	3	0.3143
DMSO	3	4	0.5863
DMSO	3	5	0.17143
DMSO	3	6	0.4571
DMSO	3	7	0.1712
DMSO	3	8	0.4295
DMSO	3	9	0.239
DMSO	3	10	0.2189
DMSO	3	11	0.4234
DMSO	3	12	0.3124
DMSO	3	13	0.2978
DMSO	3	14	0.432
DMSO	3	15	0.5345
DMSO	3	16	0.2198
DMSO	3	17	0.1892
DMSO	3	18	0.1045
DMSO	3	19	0.231
DMSO	3	20	0.2856
DMSO	3	21	0.1873
DMSO	4	1	0.1673
DMSO	4	2	0.1356
DMSO	4	3	0.1865
DMSO	4	4	0.1248
DMSO	4	5	0.3278
DMSO	4	6	0.4234
DMSO	4	7	0.564
DMSO	4	8	0.236
DMSO	4	9	0.321
DMSO	4	10	0.3856
DMSO	4	11	0.4134
DMSO	4	12	0.432
DMSO	4	13	0.3756
DMSO	4	14	0.2134
DMSO	4	15	0.4323
DMSO	4	16	0.3212
DMSO	4	17	0.123
DMSO	5	1	0.429
DMSO	5	2	0.329
DMSO	5	3	0.3124
DMSO	5	4	0.1987
DMSO	5	5	0.2013
DMSO	5	6	0.3123
DMSO	5	7	0.1076
DMSO	5	8	0.10034
DMSO	5	9	0.213
DMSO	5	10	0.4123
DMSO	5	11	0.623
DMSO	5	12	0.679
DMSO	5	13	0.3489
DMSO	5	14	0.534
DMSO	5	15	0.5436
DMSO	5	16	0.678
DMSO	5	17	0.345
DMSO	5	18	0.5436
DMSO	5	19	0.3217
20uM LY	1	1	0.092449
20uM LY	1	2	0.017
20uM LY	1	3	0.185184
20uM LY	1	4	0.074551
20uM LY	1	5	0.1032
20uM LY	1	6	0.19849
20uM LY	1	7	0.00967347
20uM LY	1	8	0.17224
20uM LY	1	9	0.0681633
20uM LY	1	10	0.0469184
20uM LY	1	11	0.1853
20uM LY	1	12	0.05374
20uM LY	1	13	0.04319
20uM LY	1	14	0.03425
20uM LY	1	15	0.02456
20uM LY	1	16	0.09322
20uM LY	1	17	0.321
20uM LY	1	18	0.456
20uM LY	1	19	0.12356
20uM LY	1	20	0
20uM LY	2	1	0.0866735
20uM LY	2	2	0.165633
20uM LY	2	3	0.135796
20uM LY	2	4	0.154592
20uM LY	2	5	0.0988163
20uM LY	2	6	0.0212449
20uM LY	2	7	0.131143
20uM LY	2	8	0.0382653
20uM LY	2	9	0.0168367
20uM LY	2	10	0.13849
20uM LY	2	11	0.16533
20uM LY	2	12	0.18546
20uM LY	2	13	0.13756
20uM LY	2	14	0.162234
20uM LY	2	15	0.1832
20uM LY	2	16	0.239
20uM LY	2	17	0.3123
20uM LY	2	18	0.2612
20uM LY	2	19	0.28532
20uM LY	3	1	0.10567
20uM LY	3	2	0.1032
20uM LY	3	3	0.10204
20uM LY	3	4	0.1934
20uM LY	3	5	0.123
20uM LY	3	6	0.1023
20uM LY	3	7	0.219
20uM LY	3	8	0.09352
20uM LY	3	9	0.04233
20uM LY	3	10	0.095123
20uM LY	3	11	0.06723
20uM LY	3	12	0.14522
20uM LY	3	13	0.2348
20uM LY	3	14	0.18924
20uM LY	3	15	0.07254
20uM LY	3	16	0.1784
20uM LY	3	17	0.1983
20uM LY	3	18	0.19435
20uM LY	3	19	0.1353
20uM LY	3	20	0.09453
20uM LY	3	21	0.1567
20uM LY	4	1	0.1524
20uM LY	4	2	0.08254
20uM LY	4	3	0.034262
20uM LY	4	4	0.09163
20uM LY	4	5	0.1345
20uM LY	4	6	0.0935
20uM LY	4	7	0.13984
20uM LY	4	8	0.3284
20uM LY	4	9	0.18546
20uM LY	4	10	0.4042
20uM LY	4	11	0.21023
20uM LY	4	12	0.3033
20uM LY	4	13	0.1833
20uM LY	4	14	0.154
20uM LY	4	15	0.32839
20uM LY	4	16	0.28465
20uM LY	4	17	0.14546
20uM LY	4	18	0.562
20uM LY	4	19	0.213
20uM LY	4	20	0.0934
20uM LY	5	1	0.13945
20uM LY	5	2	0.193
20uM LY	5	3	0.1094
20uM LY	5	4	0.18495
20uM LY	5	5	0.1334
20uM LY	5	6	0.3219
20uM LY	5	7	0.2341
20uM LY	5	8	0.3451
20uM LY	5	9	0.1093
20uM LY	5	10	0.14353
20uM LY	5	11	0.32446
20uM LY	5	12	0.3218
20uM LY	5	13	0.1032
20uM LY	5	14	0.2352
20uM LY	5	15	0.16734
20uM LY	5	16	0.1092
20uM LY	5	17	0.174
20uM LY	5	18	0.1023
20uM LY	5	19	0.1534
20uM LY	5	20	0.14253
20uM LY	5	21	0.06273
20uM LY	5	22	0.2485
20uM LY	6	1	0.2564
20uM LY	6	2	0.2134
20uM LY	6	3	0.10938
20uM LY	6	4	0.10845
20uM LY	6	5	0.193
20uM LY	6	6	0.1742
20uM LY	6	7	0.3218
20uM LY	6	8	0.234
20uM LY	6	9	0.2918
20uM LY	6	10	0.1034
20uM LY	6	11	0.10345
20uM LY	6	12	0.1784
20uM LY	6	13	0.2467
20uM LY	6	14	0.2435
20uM LY	6	15	0.342
20uM LY	6	16	0.6452
20uM LY	6	17	0.1992
20uM LY	6	18	0.1864
20uM LY	6	19	0.16475
20uM LY	6	20	0.2134
20uM LY	6	21	0.3298
20uM LY	6	22	0.2136
20uM LY	6	23	0.32674

## Sheet: Fig 3- Fig Suppl. 2F_average
Figure 3 - Figure supplement 2F
							p-values: Two-way anova
			Mean	SEM			DMSO Anterior vs. LY Anterior	0.057
Average absolute Velocity along anterior-posterior axis	Top	DMSO	0.142	0.014			DMSO Anterior vs. DMSO Middle	0.0017
		20uM LY	0.1068	0.024			DMSO Anterior vs. LY Middle	0.001
	Middle	DMSO	0.2098	0.016			DMSO Anterior vs. DMSO Posterior	0.000145
		20uM LY	0.1785	0.021			DMSO Anterior vs. LY Posterior	0.000198
	Bottom	DMSO	0.3091	0.008			LY Anterior vs. DMSO Middle	0.000156
		20uM LY	0.2844	0.019			LY Anterior vs. LY Middle	0.000189
							LY Anterior vs. DMSO Posterior	0.000159
							LY Anterior vs. LY Posterior	0.000176
							DMSO Middle vs. LY Middle	0.9999
							DMSO Middle vs. DMSO Posterior	0.000187
							DMSO Middle vs. LY Posterior	0.0024
							LY Middle vs. DMSO Posterior	0.000183
							LY Middle vs. LY Posterior	0.0007
							DMSO Posterior vs. LY Posterior	0.7441

## Sheet: Fig 3- Fig Suppl. 2F_raw
Figure 3 - Figure supplement 2F
Top					Middle					Bottom
Treatment	Embryo #	Cell #	Velocity		Treatment	Embryo #	Cell #	Velocity		Treatment	Embryo #	Cell #	Bottom
DMSO	1	1	0.220458		DMSO	1	3	0.148541		DMSO	1	10	0.336786
DMSO	1	2	0.136661		DMSO	1	4	0.292887		DMSO	1	16	0.272328
DMSO	1	7	0.296216		DMSO	1	5	0.271626		DMSO	1	17	0.226577
DMSO	1	8	0.127491		DMSO	1	6	0.20558		DMSO	1	19	0.361694
DMSO	1	12	0.123079		DMSO	1	9	0.089325		DMSO	2	7	0.265465
DMSO	1	13	0.229752		DMSO	1	14	0.149377		DMSO	2	9	0.324871
DMSO	1	18	0.219595		DMSO	1	15	0.163201		DMSO	2	11	0.362688
DMSO	2	1	0.132373		DMSO	2	2	0.202377		DMSO	2	14	0.27389
DMSO	2	3	0.121197		DMSO	2	8	0.200926		DMSO	2	16	0.289465
DMSO	2	4	0.169314		DMSO	2	12	0.213658		DMSO	2	17	0.279995
DMSO	2	5	0.155955		DMSO	2	13	0.239933		DMSO	2	18	0.291707
DMSO	2	6	0.160386		DMSO	2	15	0.222508		DMSO	2	20	0.259557
DMSO	2	10	0.14289		DMSO	3	3	0.192868		DMSO	3	1	0.348459
DMSO	2	19	0.171066		DMSO	3	4	0.2016		DMSO	3	2	0.27874
DMSO	3	7	0.134151		DMSO	3	6	0.173966		DMSO	3	12	0.301975
DMSO	3	9	0.119046		DMSO	3	8	0.227462		DMSO	4	1	0.315217
DMSO	3	10	0.173746		DMSO	3	13	0.170874		DMSO	4	2	0.285577
DMSO	3	11	0.120458		DMSO	3	14	0.190639		DMSO	4	3	0.270845
DMSO	3	15	0.143471		DMSO	3	19	0.160345		DMSO	4	7	0.251282
DMSO	3	16	0.141929		DMSO	3	20	0.243822		DMSO	4	11	0.28276
DMSO	3	18	0.084112		DMSO	3	21	0.236234		DMSO	4	12	0.44008
DMSO	4	8	0.178131		DMSO	4	4	0.208142		DMSO	4	14	0.253851
DMSO	4	15	0.131661		DMSO	4	5	0.21958		DMSO	5	4	0.314537
DMSO	4	16	0.080935		DMSO	4	6	0.223547		DMSO	5	5	0.32906
DMSO	5	1	0.100014		DMSO	4	9	0.243123		DMSO	5	6	0.332622
DMSO	5	2	0.101687		DMSO	4	10	0.217443		DMSO	5	7	0.307838
DMSO	5	14	0.129955		DMSO	4	17	0.165266		DMSO	5	8	0.388805
DMSO	5	16	0.077295		DMSO	5	3	0.23577		DMSO	5	11	0.362603
DMSO	5	17	0.112713		DMSO	5	9	0.294214		DMSO	5	13	0.364786
DMSO	5	18	0.10689		DMSO	5	10	0.306613		20uM LY	1	11	0.21354
20uM LY	1	1	0.051212		DMSO	5	12	0.318018		20uM LY	1	12	0.3261
20uM LY	1	2	0.027983		DMSO	5	15	0.238665		20uM LY	1	13	0.121404
20uM LY	1	4	0.056127		DMSO	5	19	0.315835		20uM LY	1	14	0.165783
20uM LY	1	5	0.061401		20uM LY	1	3	0.3422		20uM LY	1	15	0.151743
20uM LY	1	7	0.074859		20uM LY	1	6	0.121567		20uM LY	1	19	0.159338
20uM LY	1	8	0.051754		20uM LY	1	9	0.125848		20uM LY	1	20	0.25422
20uM LY	1	17	0.063297		20uM LY	1	10	0.4521		20uM LY	2	1	0.4223
20uM LY	2	15	0.229486		20uM LY	1	16	0.2454		20uM LY	2	4	0.224253
20uM LY	2	16	0.193591		20uM LY	1	18	0.10171		20uM LY	2	5	0.234273
20uM LY	2	17	0.184061		20uM LY	2	2	0.130638		20uM LY	2	6	0.272436
20uM LY	2	18	0.226205		20uM LY	2	3	0.140135		20uM LY	2	7	0.209717
20uM LY	3	1	0.028617		20uM LY	2	11	0.303299		20uM LY	2	8	0.260613
20uM LY	3	2	0.061833		20uM LY	2	12	0.235416		20uM LY	2	9	0.351227
20uM LY	3	5	0.043826		20uM LY	2	14	0.287011		20uM LY	2	10	0.339292
20uM LY	3	10	0.080408		20uM LY	2	19	0.255181		20uM LY	2	13	0.332632
20uM LY	3	13	0.099525		20uM LY	3	3	0.117946		20uM LY	3	7	0.176364
20uM LY	3	16	0.122401		20uM LY	3	4	0.148318		20uM LY	3	8	0.235423
20uM LY	3	21	0.086003		20uM LY	3	6	0.113887		20uM LY	3	17	0.256828
20uM LY	4	1	0.105441		20uM LY	3	9	0.11173		20uM LY	3	18	0.4753
20uM LY	4	2	0.07546		20uM LY	3	11	0.142344		20uM LY	4	8	0.216207
20uM LY	4	3	0.019682		20uM LY	3	12	0.125554		20uM LY	4	10	0.174547
20uM LY	4	6	0.076107		20uM LY	3	14	0.135371		20uM LY	4	11	0.2849
20uM LY	4	7	0.05365		20uM LY	3	15	0.145011		20uM LY	4	12	0.41341
20uM LY	4	15	0.102584		20uM LY	3	19	0.176645		20uM LY	4	20	0.354207
20uM LY	4	16	0.154682		20uM LY	3	20	0.157684		20uM LY	5	5	0.423312
20uM LY	4	17	0.164192		20uM LY	4	4	0.156534		20uM LY	5	12	0.297619
20uM LY	5	6	0.187852		20uM LY	4	5	0.142344		20uM LY	5	13	0.29424
20uM LY	5	8	0.187852		20uM LY	4	9	0.149482		20uM LY	5	14	0.282587
20uM LY	5	17	0.183297		20uM LY	4	13	0.421272		20uM LY	5	3	0.280841
20uM LY	5	18	0.16899		20uM LY	4	14	0.329292		20uM LY	5	4	0.258658
20uM LY	5	19	0.120944		20uM LY	4	18	0.255723		20uM LY	5	7	0.228005
20uM LY	5	20	0.107088		20uM LY	4	19	0.433116		20uM LY	6	4	0.245325
20uM LY	5	21	0.094722		20uM LY	5	1	0.338246		20uM LY	6	5	0.262841
20uM LY	6	6	0.07729		20uM LY	5	2	0.338174		20uM LY	6	22	0.34262
20uM LY	6	7	0.035852		20uM LY	5	9	0.223155		20uM LY	6	23	0.26362
20uM LY	6	8	0.026624		20uM LY	5	10	0.262233		20uM LY	6	13	0.4305
20uM LY	6	9	0.061963		20uM LY	5	11	0.268743		20uM LY	6	3	0.225685
20uM LY	6	10	0.079349		20uM LY	5	15	0.359416		20uM LY	6	2	0.6364
20uM LY	6	12	0.085682		20uM LY	5	16	0.247057
20uM LY	6	15	0.069192		20uM LY	5	22	0.135005
20uM LY	6	16	0.053702		20uM LY	6	1	0.136416
20uM LY	6	19	0.071277		20uM LY	6	11	0.177436
20uM LY	6	20	0.04546		20uM LY	6	14	0.172161
20uM LY	6	21	0.038395		20uM LY	6	17	0.313
					20uM LY	6	18	0.110344
