# Supplementary material for: The myocardium utilizes a platelet-derived growth factor receptor alpha (Pdgfra)–phosphoinositide 3-kinase (PI3K) signaling cascade to steer toward the midline during zebrafish heart tube formation
Source: eLife. 2023 Nov 3;12:e85930. doi: 10.7554/eLife.85930 (PMC10651176; doi:10.7554/eLife.85930)
Supplement: Figure 3—source data 1. [file elife-85930-fig3-data1.xlsx]

## Sheet: Fig 3_average for graphs
Figure 3- Statistics
		Mean	SEM						p-values:Two-tailed t-test
Average speed	DMSO	0.6456	0.033						Speed	0.02206
	20uM LY	0.5432	0.068						Efficiency index	0.0084
Average efficiency index	DMSO	0.2771	0.008						Direction	0.0002
	20uM LY	0.2117	0.0302
Average angle of displacement	DMSO	31.34	3.25
	20uM LY	60.55	3.47

## Sheet: Fig 3_raw values for graphs
Fig. 3
Treatment	Embryo #	Cell #	Speed	Efficiency index	Angle of displacement
DMSO	1	1	0.642847	0.308887	24.32
DMSO	1	2	0.626227	0.249452	3.4
DMSO	1	3	0.72392	0.205603	15.4
DMSO	1	4	0.758013	0.333415	37.67
DMSO	1	5	0.784767	0.303258	40.5
DMSO	1	6	0.667527	0.252844	18.4
DMSO	1	7	0.646007	0.417715	32.45
DMSO	1	8	0.64962	0.220827	18.45
DMSO	1	9	0.561367	0.184027	19.2
DMSO	1	10	0.74934	0.374507	34.5
DMSO	1	11	0.801133	0.222751	22.34
DMSO	1	12	0.77654	0.20539	3.45
DMSO	1	13	0.905267	0.19799	28.9
DMSO	1	14	0.61396	0.222794	17.01
DMSO	1	15	0.835333	0.199433	16.7
DMSO	1	16	0.68598	0.369039	31.24
DMSO	1	17	0.783713	0.248399	38.56
DMSO	1	18	0.8037	0.253901	15.5
DMSO	1	19	0.707193	0.421648	43.34
DMSO	2	1	0.90662	0.17937	29.3
DMSO	2	2	0.7473	0.242571	35.56
DMSO	2	3	0.55328	0.222913	29.4
DMSO	2	4	0.640627	0.253158	14.56
DMSO	2	5	0.527647	0.267212	17.74
DMSO	2	6	0.76388	0.183502	25.34
DMSO	2	7	0.714613	0.289173	29.34
DMSO	2	8	0.610753	0.254604	12.34
DMSO	2	9	0.69888	0.346593	24.56
DMSO	2	10	0.6298	0.222261	17.3
DMSO	2	11	0.837013	0.336833	45.56
DMSO	2	12	0.842093	0.221108	22.3
DMSO	2	13	0.72234	0.263625	32.4
DMSO	2	14	0.61616	0.34556	13.4
DMSO	2	15	0.54738	0.366132	22.5
DMSO	2	16	0.623367	0.361478	37.6
DMSO	2	17	0.7971	0.276728	12.3
DMSO	2	18	0.694613	0.339335	15.6
DMSO	2	19	0.797507	0.190669	24.56
DMSO	2	20	0.668687	0.340289	28.98
DMSO	3	1	0.625833	0.381422	30.4
DMSO	3	2	0.583933	0.341512	24.5
DMSO	3	3	0.491087	0.283331	17.8
DMSO	3	4	0.437907	0.311254	16.6
DMSO	3	5	0.471353	0.316069	19.09
DMSO	3	6	0.443287	0.285007	14.5
DMSO	3	7	0.48152	0.209254	16.78
DMSO	3	8	0.55208	0.295525	9.4
DMSO	3	9	0.68178	0.151711	6.78
DMSO	3	10	0.625807	0.191326	23.4
DMSO	3	11	0.47944	0.370682	33.56
DMSO	3	12	0.804633	0.120734	46.7
DMSO	3	13	0.498427	0.267187	34.5
DMSO	3	14	0.62542	0.21141	29.5
DMSO	3	15	0.546213	0.247083	42.3
DMSO	3	16	0.517127	0.317459	18.45
DMSO	3	17	0.716513	0.121794	47.67
DMSO	3	18	0.904167	0.124387	43.4
DMSO	3	19	0.62212	0.242718	47.8
DMSO	3	20	0.683127	0.254321	60.03
DMSO	3	21	0.82798	0.214711	49.67
DMSO	4	1	0.60474	0.228506	49
DMSO	4	2	0.4558	0.35994	43.23
DMSO	4	3	0.433213	0.528979	37.56
DMSO	4	4	0.536633	0.254198	19.34
DMSO	4	5	0.493453	0.369492	17.8
DMSO	4	6	0.501533	0.302012	18.9
DMSO	4	7	0.4052	0.349505	20.34
DMSO	4	8	0.415687	0.461767	49.56
DMSO	4	9	0.49138	0.358669	20.34
DMSO	4	10	0.484287	0.158929	45.5
DMSO	4	11	0.539813	0.159595	58.6
DMSO	4	12	0.615213	0.431773	43.5
DMSO	4	13	0.921453	0.12488	32.43
DMSO	4	14	0.662607	0.148843	34.5
DMSO	4	15	0.374713	0.400247	65.4
DMSO	4	16	0.57568	0.258183	48.66
DMSO	4	17	0.670193	0.104904	46.86
DMSO	5	1	0.653127	0.395217	29.04
DMSO	5	2	0.60122	0.353847	35.52
DMSO	5	3	0.554293	0.389	23.45
DMSO	5	4	0.693947	0.311551	14.56
DMSO	5	5	0.536427	0.431	19.3
DMSO	5	6	0.687927	0.316545	20.34
DMSO	5	7	0.733487	0.401125	42.3
DMSO	5	8	0.86508	0.296497	22.34
DMSO	5	9	0.63362	0.373894	24.5
DMSO	5	10	0.578727	0.516041	32.34
DMSO	5	11	0.891787	0.227767	75.6
DMSO	5	12	0.706873	0.259566	75.45
DMSO	5	13	0.56534	0.200328	82.34
DMSO	5	14	0.688513	0.071536	44.34
DMSO	5	15	0.705833	0.177634	32.8
DMSO	5	16	0.754733	0.186892	75.45
DMSO	5	17	0.57614	0.242291	49.03
DMSO	5	18	0.701927	0.169438	14.5
DMSO	5	19	0.539633	0.23915	35.6
20uM LY	1	1	0.373807	0.120064	25.43
20uM LY	1	2	0.200573	0.123606	29.45
20uM LY	1	3	0.525667	0.13333	54.67
20uM LY	1	4	0.240113	0.144054	18.45
20uM LY	1	5	0.392433	0.097316	24.34
20uM LY	1	6	0.410233	0.171027	42.34
20uM LY	1	7	0.372553	0.107868	54.45
20uM LY	1	8	0.351113	0.097766	45.67
20uM LY	1	9	0.43698	0.152783	56.78
20uM LY	1	10	0.291053	0.152584	65.3
20uM LY	1	11	0.255487	0.201909	48.5
20uM LY	1	12	0.40708	0.18651	78.45
20uM LY	1	13	0.29604	0.217966	56.45
20uM LY	1	14	0.262353	0.282828	78.45
20uM LY	1	15	0.33198	0.224407	86.7
20uM LY	1	16	0.32288	0.142378	45.56
20uM LY	1	17	0.253193	0.160594	49.45
20uM LY	1	18	0.36074	0.148542	35.6
20uM LY	1	19	0.46318	0.143269	42.34
20uM LY	1	20	0.252947	0.210577	54.5
20uM LY	2	1	0.283233	0.22842	25.6
20uM LY	2	2	0.212473	0.273117	22.4
20uM LY	2	3	0.258833	0.250941	43.45
20uM LY	2	4	0.43538	0.268658	25.4
20uM LY	2	5	0.313967	0.293482	23.45
20uM LY	2	6	0.409707	0.291156	32.3
20uM LY	2	7	0.291087	0.345384	83.45
20uM LY	2	8	0.317933	0.369803	43.45
20uM LY	2	9	0.517167	0.347683	60.34
20uM LY	2	10	0.315813	0.435959	65.5
20uM LY	2	11	0.330247	0.380527	43.45
20uM LY	2	12	0.280773	0.375853	56.7
20uM LY	2	13	0.44514	0.360738	76.56
20uM LY	2	14	0.3436	0.391501	78.89
20uM LY	2	15	0.273747	0.357786	56.67
20uM LY	2	16	0.27094	0.306097	76.78
20uM LY	2	17	0.300167	0.289597	60.43
20uM LY	2	18	0.274873	0.345538	89.56
20uM LY	2	19	0.421107	0.302546	79.45
20uM LY	3	1	0.431793	0.05143	84.56
20uM LY	3	2	0.160953	0.180116	78.7
20uM LY	3	3	0.167547	0.273199	56.67
20uM LY	3	4	0.261567	0.271207	86.56
20uM LY	3	5	0.20432	0.111743	70.32
20uM LY	3	6	0.263687	0.210314	84.56
20uM LY	3	7	0.742173	0.215983	86.78
20uM LY	3	8	0.67378	0.247042	67.78
20uM LY	3	9	0.70976	0.135523	73.45
20uM LY	3	10	0.546253	0.14642	70.45
20uM LY	3	11	0.765253	0.140315	48.56
20uM LY	3	12	0.726873	0.14532	48.56
20uM LY	3	13	0.782027	0.108001	66.78
20uM LY	3	14	0.490747	0.181533	56.67
20uM LY	3	15	0.8103	0.138309	46.5
20uM LY	3	16	0.770893	0.131418	28.9
20uM LY	3	17	0.75118	0.241244	76.5
20uM LY	3	18	0.575133	0.242341	88.5
20uM LY	3	19	0.726073	0.204419	50.56
20uM LY	3	20	0.640467	0.197351	75.6
20uM LY	3	21	0.492353	0.158753	83.34
20uM LY	4	1	0.640573	0.142387	87.4
20uM LY	4	2	1.02261	0.063683	35.6
20uM LY	4	3	0.637707	0.048903	68.77
20uM LY	4	4	0.822367	0.150905	64.56
20uM LY	4	5	0.7222	0.140743	76.56
20uM LY	4	6	0.5283	0.109689	89.56
20uM LY	4	7	0.3951	0.11896	67.78
20uM LY	4	8	0.610933	0.248948	83.45
20uM LY	4	9	0.384647	0.233908	76.67
20uM LY	4	10	0.559847	0.21256	85.55
20uM LY	4	11	0.69382	0.280124	84.5
20uM LY	4	12	0.711593	0.392748	86.7
20uM LY	4	13	1.19877	0.263165	75.66
20uM LY	4	14	0.596813	0.387602	65.6
20uM LY	4	15	1.02522	0.127841	79.02
20uM LY	4	16	0.830233	0.136474	67.4
20uM LY	4	17	0.496647	0.211403	54.34
20uM LY	4	18	0.7366	0.245783	73.4
20uM LY	4	19	0.766713	0.379444	62.45
20uM LY	4	20	0.630387	0.346016	70.12
20uM LY	5	1	0.83444	0.316487	87.3
20uM LY	5	2	0.673013	0.356573	73.4
20uM LY	5	3	0.52406	0.329982	80.23
20uM LY	5	4	0.5916	0.294509	74.5
20uM LY	5	5	0.666993	0.425155	68.34
20uM LY	5	6	0.70048	0.202781	43.23
20uM LY	5	7	0.62826	0.284967	27.54
20uM LY	5	8	0.535693	0.305236	43.2
20uM LY	5	9	0.48488	0.368269	64.5
20uM LY	5	10	0.592553	0.327297	50.23
20uM LY	5	11	0.63114	0.315831	68.9
20uM LY	5	12	0.660627	0.306002	65.34
20uM LY	5	13	0.751367	0.318412	70.23
20uM LY	5	14	0.651507	0.278894	65.34
20uM LY	5	15	0.63152	0.233187	56.7
20uM LY	5	16	0.954547	0.146921	34.43
20uM LY	5	17	0.7012	0.148987	32.3
20uM LY	5	18	0.550953	0.171586	43.45
20uM LY	5	19	0.615487	0.142884	60.3
20uM LY	5	20	0.756487	0.156545	54.3
20uM LY	5	21	0.666153	0.173734	69.05
20uM LY	5	22	0.642693	0.262001	67.45
20uM LY	6	1	0.760387	0.236932	75.67
20uM LY	6	2	0.888707	0.200985	87.45
20uM LY	6	3	0.744927	0.284516	72.3
20uM LY	6	4	0.723967	0.097774	46.7
20uM LY	6	5	0.694147	0.049246	25.6
20uM LY	6	6	0.63324	0.038148	13.5
20uM LY	6	7	0.568013	0.0521	25.6
20uM LY	6	8	0.792787	0.069676	38.5
20uM LY	6	9	0.917233	0.142035	83.65
20uM LY	6	10	0.713833	0.104468	54.56
20uM LY	6	11	0.5841	0.139412	49.07
20uM LY	6	12	0.68678	0.168738	76.7
20uM LY	6	13	0.69844	0.082335	54.34
20uM LY	6	14	0.643713	0.087486	39.56
20uM LY	6	15	0.708453	0.118069	52.34
20uM LY	6	16	0.595247	0.153629	56.7
20uM LY	6	17	0.614253	0.096252	49.09
20uM LY	6	18	0.650313	0.083906	82.34
20uM LY	6	19	0.677427	0.071831	75.6
20uM LY	6	20	0.599733	0.189505	87.5
20uM LY	6	21	0.448047	0.147037	75.6
20uM LY	6	22	0.54652	0.128195	72.3
20uM LY	6	23	0.611433	0.153399	56.67

## Sheet: Fig 3_xy_all timepoints
Treatment	Embryo #	Cell #	x [micron]	y [micron]	t [sec]
DMSO	1	1	298.459	236.01	0
DMSO	1	1	300.893	231.955	225
DMSO	1	1	302.515	229.522	450
DMSO	1	1	303.326	229.522	675
DMSO	1	1	303.326	232.766	900
DMSO	1	1	303.326	233.577	1125
DMSO	1	1	308.192	233.577	1350
DMSO	1	1	310.625	232.766	1575
DMSO	1	1	310.625	232.766	1800
DMSO	1	1	312.247	231.955	2025
DMSO	1	1	315.491	231.144	2250
DMSO	1	1	317.113	231.144	2475
DMSO	1	1	317.113	229.522	2700
DMSO	1	1	317.924	229.522	2925
DMSO	1	1	320.357	226.278	3150
DMSO	1	1	318.735	225.467	3375
DMSO	1	1	321.168	223.845	3600
DMSO	1	1	320.357	223.034	3825
DMSO	1	1	320.357	223.034	4050
DMSO	1	1	320.357	223.034	4275
DMSO	1	1	320.357	223.034	4500
DMSO	1	1	321.168	224.656	4725
DMSO	1	1	322.79	223.034	4950
DMSO	1	1	321.979	223.034	5175
DMSO	1	1	321.979	225.467	5400
DMSO	1	1	323.601	226.278	5625
DMSO	1	1	329.279	223.034	5850
DMSO	1	1	331.712	223.845	6075
DMSO	1	1	332.523	229.522	6300
DMSO	1	1	333.334	230.333	6525
DMSO	1	1	334.145	228.711	6750
DMSO	1	1	336.578	233.577	6975
DMSO	1	1	337.389	235.199	7200
DMSO	1	1	334.956	238.443	7425
DMSO	1	1	335.767	239.254	7650
DMSO	1	1	337.389	236.821	7875
DMSO	1	1	338.2	236.821	8100
DMSO	1	1	339.822	236.01	8325
DMSO	1	1	338.2	238.443	8550
DMSO	1	1	338.2	239.254	8775
DMSO	1	1	339.011	237.632	9000
DMSO	1	1	339.011	244.12	9225
DMSO	1	1	338.2	242.498	9450
DMSO	1	1	339.011	243.309	9675
DMSO	1	1	339.822	245.742	9900
DMSO	1	1	340.633	245.742	10125
DMSO	1	1	339.011	246.553	10350
DMSO	1	1	338.2	246.553	10575
DMSO	1	1	339.822	248.987	10800
DMSO	1	2	295.215	266.018	0
DMSO	1	2	300.893	263.585	225
DMSO	1	2	300.893	263.585	450
DMSO	1	2	304.948	256.286	675
DMSO	1	2	304.137	255.475	900
DMSO	1	2	304.948	255.475	1125
DMSO	1	2	304.137	257.097	1350
DMSO	1	2	307.381	254.664	1575
DMSO	1	2	306.57	255.475	1800
DMSO	1	2	307.381	255.475	2025
DMSO	1	2	311.436	254.664	2250
DMSO	1	2	311.436	252.231	2475
DMSO	1	2	313.058	252.231	2700
DMSO	1	2	314.68	252.231	2925
DMSO	1	2	314.68	254.664	3150
DMSO	1	2	313.869	254.664	3375
DMSO	1	2	313.869	253.853	3600
DMSO	1	2	313.869	252.231	3825
DMSO	1	2	314.68	252.231	4050
DMSO	1	2	317.113	250.609	4275
DMSO	1	2	313.058	253.853	4500
DMSO	1	2	313.058	254.664	4725
DMSO	1	2	313.869	257.097	4950
DMSO	1	2	316.302	254.664	5175
DMSO	1	2	315.491	255.475	5400
DMSO	1	2	316.302	257.097	5625
DMSO	1	2	316.302	257.097	5850
DMSO	1	2	315.491	257.097	6075
DMSO	1	2	314.68	255.475	6300
DMSO	1	2	313.869	257.097	6525
DMSO	1	2	313.869	256.286	6750
DMSO	1	2	313.869	257.908	6975
DMSO	1	2	317.924	258.719	7200
DMSO	1	2	319.546	261.963	7425
DMSO	1	2	318.735	258.719	7650
DMSO	1	2	320.357	261.963	7875
DMSO	1	2	322.79	261.152	8100
DMSO	1	2	322.79	261.963	8325
DMSO	1	2	321.979	263.585	8550
DMSO	1	2	323.601	263.585	8775
DMSO	1	2	322.79	261.963	9000
DMSO	1	2	324.412	261.963	9225
DMSO	1	2	324.412	265.207	9450
DMSO	1	2	323.601	266.829	9675
DMSO	1	2	325.223	266.829	9900
DMSO	1	2	326.846	269.262	10125
DMSO	1	2	326.035	268.451	10350
DMSO	1	2	325.223	268.451	10575
DMSO	1	2	326.846	267.64	10800
DMSO	1	3	292.782	285.483	0
DMSO	1	3	291.971	283.05	225
DMSO	1	3	296.026	279.806	450
DMSO	1	3	296.837	278.995	675
DMSO	1	3	297.648	276.562	900
DMSO	1	3	298.459	275.751	1125
DMSO	1	3	297.648	275.751	1350
DMSO	1	3	298.459	274.94	1575
DMSO	1	3	300.082	276.562	1800
DMSO	1	3	306.57	274.129	2025
DMSO	1	3	304.137	274.129	2250
DMSO	1	3	304.948	274.94	2475
DMSO	1	3	306.57	274.94	2700
DMSO	1	3	307.381	272.506	2925
DMSO	1	3	309.003	272.506	3150
DMSO	1	3	308.192	271.695	3375
DMSO	1	3	310.625	271.695	3600
DMSO	1	3	306.57	270.884	3825
DMSO	1	3	311.436	268.451	4050
DMSO	1	3	309.814	266.829	4275
DMSO	1	3	309.003	270.073	4500
DMSO	1	3	310.625	268.451	4725
DMSO	1	3	309.814	273.317	4950
DMSO	1	3	310.625	269.262	5175
DMSO	1	3	309.814	274.129	5400
DMSO	1	3	311.436	271.695	5625
DMSO	1	3	311.436	271.695	5850
DMSO	1	3	309.814	274.94	6075
DMSO	1	3	310.625	274.94	6300
DMSO	1	3	311.436	274.94	6525
DMSO	1	3	311.436	272.506	6750
DMSO	1	3	312.247	276.562	6975
DMSO	1	3	313.869	278.184	7200
DMSO	1	3	315.491	278.184	7425
DMSO	1	3	315.491	280.617	7650
DMSO	1	3	316.302	282.239	7875
DMSO	1	3	319.546	284.672	8100
DMSO	1	3	318.735	285.483	8325
DMSO	1	3	320.357	286.294	8550
DMSO	1	3	320.357	287.916	8775
DMSO	1	3	322.79	287.916	9000
DMSO	1	3	321.979	289.538	9225
DMSO	1	3	321.168	290.349	9450
DMSO	1	3	321.168	291.16	9675
DMSO	1	3	322.79	292.782	9900
DMSO	1	3	322.79	293.593	10125
DMSO	1	3	323.601	291.16	10350
DMSO	1	3	322.79	294.404	10575
DMSO	1	3	322.79	291.971	10800
DMSO	1	4	309.003	334.145	0
DMSO	1	4	314.68	331.712	225
DMSO	1	4	317.113	332.523	450
DMSO	1	4	322.79	330.09	675
DMSO	1	4	321.979	326.846	900
DMSO	1	4	322.79	326.035	1125
DMSO	1	4	326.035	320.357	1350
DMSO	1	4	323.601	327.657	1575
DMSO	1	4	329.279	322.79	1800
DMSO	1	4	331.712	320.357	2025
DMSO	1	4	332.523	320.357	2250
DMSO	1	4	332.523	321.168	2475
DMSO	1	4	333.334	317.924	2700
DMSO	1	4	334.956	316.302	2925
DMSO	1	4	333.334	317.924	3150
DMSO	1	4	333.334	317.113	3375
DMSO	1	4	334.145	314.68	3600
DMSO	1	4	337.389	313.058	3825
DMSO	1	4	336.578	311.436	4050
DMSO	1	4	336.578	310.625	4275
DMSO	1	4	338.2	306.57	4500
DMSO	1	4	339.822	304.137	4725
DMSO	1	4	339.011	302.515	4950
DMSO	1	4	339.011	303.326	5175
DMSO	1	4	339.011	303.326	5400
DMSO	1	4	341.444	301.704	5625
DMSO	1	4	341.444	300.893	5850
DMSO	1	4	341.444	301.704	6075
DMSO	1	4	338.2	297.648	6300
DMSO	1	4	339.011	298.459	6525
DMSO	1	4	337.389	300.082	6750
DMSO	1	4	338.2	302.515	6975
DMSO	1	4	339.822	304.948	7200
DMSO	1	4	339.822	302.515	7425
DMSO	1	4	341.444	302.515	7650
DMSO	1	4	345.499	303.326	7875
DMSO	1	4	345.499	302.515	8100
DMSO	1	4	344.688	302.515	8325
DMSO	1	4	344.688	300.893	8550
DMSO	1	4	343.877	300.082	8775
DMSO	1	4	344.688	298.459	9000
DMSO	1	4	343.066	300.893	9225
DMSO	1	4	344.688	299.27	9450
DMSO	1	4	343.066	300.082	9675
DMSO	1	4	343.066	299.27	9900
DMSO	1	4	344.688	299.27	10125
DMSO	1	4	343.066	303.326	10350
DMSO	1	4	343.066	302.515	10575
DMSO	1	4	343.066	300.893	10800
DMSO	1	5	304.137	327.657	0
DMSO	1	5	309.003	322.79	225
DMSO	1	5	315.491	320.357	450
DMSO	1	5	313.058	321.979	675
DMSO	1	5	317.113	319.546	900
DMSO	1	5	317.113	317.924	1125
DMSO	1	5	317.924	314.68	1350
DMSO	1	5	321.168	311.436	1575
DMSO	1	5	323.601	313.869	1800
DMSO	1	5	324.412	311.436	2025
DMSO	1	5	326.035	309.003	2250
DMSO	1	5	326.846	307.381	2475
DMSO	1	5	327.657	307.381	2700
DMSO	1	5	327.657	307.381	2925
DMSO	1	5	327.657	306.57	3150
DMSO	1	5	330.09	304.948	3375
DMSO	1	5	329.279	304.948	3600
DMSO	1	5	331.712	303.326	3825
DMSO	1	5	330.09	301.704	4050
DMSO	1	5	332.523	303.326	4275
DMSO	1	5	334.145	299.27	4500
DMSO	1	5	334.145	299.27	4725
DMSO	1	5	334.956	303.326	4950
DMSO	1	5	335.767	300.082	5175
DMSO	1	5	334.956	299.27	5400
DMSO	1	5	335.767	296.026	5625
DMSO	1	5	334.956	297.648	5850
DMSO	1	5	336.578	300.893	6075
DMSO	1	5	336.578	299.27	6300
DMSO	1	5	336.578	297.648	6525
DMSO	1	5	335.767	299.27	6750
DMSO	1	5	334.956	300.082	6975
DMSO	1	5	336.578	298.459	7200
DMSO	1	5	337.389	297.648	7425
DMSO	1	5	336.578	300.893	7650
DMSO	1	5	336.578	298.459	7875
DMSO	1	5	336.578	294.404	8100
DMSO	1	5	334.145	300.893	8325
DMSO	1	5	336.578	300.893	8550
DMSO	1	5	336.578	297.648	8775
DMSO	1	5	336.578	299.27	9000
DMSO	1	5	336.578	300.082	9225
DMSO	1	5	336.578	299.27	9450
DMSO	1	5	333.334	300.893	9675
DMSO	1	5	334.956	302.515	9900
DMSO	1	5	335.767	301.704	10125
DMSO	1	5	334.145	302.515	10350
DMSO	1	5	334.956	303.326	10575
DMSO	1	5	335.767	299.27	10800
DMSO	1	6	300.893	303.326	0
DMSO	1	6	302.515	307.381	225
DMSO	1	6	304.948	303.326	450
DMSO	1	6	309.003	300.082	675
DMSO	1	6	309.003	300.893	900
DMSO	1	6	310.625	300.893	1125
DMSO	1	6	310.625	300.082	1350
DMSO	1	6	313.058	299.27	1575
DMSO	1	6	313.869	296.026	1800
DMSO	1	6	315.491	293.593	2025
DMSO	1	6	317.113	291.971	2250
DMSO	1	6	319.546	291.16	2475
DMSO	1	6	318.735	291.16	2700
DMSO	1	6	321.168	290.349	2925
DMSO	1	6	321.168	290.349	3150
DMSO	1	6	319.546	289.538	3375
DMSO	1	6	320.357	287.916	3600
DMSO	1	6	322.79	284.672	3825
DMSO	1	6	322.79	287.105	4050
DMSO	1	6	321.979	286.294	4275
DMSO	1	6	322.79	286.294	4500
DMSO	1	6	322.79	286.294	4725
DMSO	1	6	323.601	283.861	4950
DMSO	1	6	324.412	287.916	5175
DMSO	1	6	321.168	287.916	5400
DMSO	1	6	326.035	287.916	5625
DMSO	1	6	326.035	288.727	5850
DMSO	1	6	327.657	289.538	6075
DMSO	1	6	324.412	291.16	6300
DMSO	1	6	326.846	287.916	6525
DMSO	1	6	326.035	291.16	6750
DMSO	1	6	326.846	291.971	6975
DMSO	1	6	330.09	289.538	7200
DMSO	1	6	330.09	288.727	7425
DMSO	1	6	330.09	290.349	7650
DMSO	1	6	330.09	288.727	7875
DMSO	1	6	332.523	290.349	8100
DMSO	1	6	331.712	290.349	8325
DMSO	1	6	331.712	287.916	8550
DMSO	1	6	331.712	291.16	8775
DMSO	1	6	330.09	293.593	9000
DMSO	1	6	330.901	291.16	9225
DMSO	1	6	330.09	292.782	9450
DMSO	1	6	327.657	292.782	9675
DMSO	1	6	328.468	295.215	9900
DMSO	1	6	330.09	294.404	10125
DMSO	1	6	328.468	296.026	10350
DMSO	1	6	328.468	295.215	10575
DMSO	1	6	327.657	295.215	10800
DMSO	1	7	278.995	331.712	0
DMSO	1	7	284.672	326.846	225
DMSO	1	7	281.428	330.09	450
DMSO	1	7	284.672	329.279	675
DMSO	1	7	287.916	327.657	900
DMSO	1	7	287.916	327.657	1125
DMSO	1	7	290.349	324.412	1350
DMSO	1	7	291.16	322.79	1575
DMSO	1	7	291.971	321.979	1800
DMSO	1	7	296.026	320.357	2025
DMSO	1	7	296.026	318.735	2250
DMSO	1	7	295.215	318.735	2475
DMSO	1	7	297.648	317.924	2700
DMSO	1	7	299.27	315.491	2925
DMSO	1	7	300.893	314.68	3150
DMSO	1	7	301.704	313.869	3375
DMSO	1	7	304.948	313.869	3600
DMSO	1	7	309.003	310.625	3825
DMSO	1	7	310.625	309.814	4050
DMSO	1	7	310.625	309.003	4275
DMSO	1	7	309.814	310.625	4500
DMSO	1	7	309.814	309.814	4725
DMSO	1	7	309.814	308.192	4950
DMSO	1	7	311.436	307.381	5175
DMSO	1	7	312.247	309.003	5400
DMSO	1	7	314.68	305.759	5625
DMSO	1	7	313.869	307.381	5850
DMSO	1	7	313.869	307.381	6075
DMSO	1	7	314.68	306.57	6300
DMSO	1	7	315.491	307.381	6525
DMSO	1	7	314.68	308.192	6750
DMSO	1	7	316.302	306.57	6975
DMSO	1	7	317.113	304.137	7200
DMSO	1	7	318.735	303.326	7425
DMSO	1	7	319.546	304.137	7650
DMSO	1	7	322.79	303.326	7875
DMSO	1	7	321.168	300.893	8100
DMSO	1	7	323.601	300.082	8325
DMSO	1	7	323.601	297.648	8550
DMSO	1	7	323.601	297.648	8775
DMSO	1	7	324.412	296.026	9000
DMSO	1	7	324.412	300.893	9225
DMSO	1	7	326.035	298.459	9450
DMSO	1	7	325.223	299.27	9675
DMSO	1	7	326.035	298.459	9900
DMSO	1	7	326.846	297.648	10125
DMSO	1	7	330.09	296.837	10350
DMSO	1	7	330.09	297.648	10575
DMSO	1	7	330.09	296.837	10800
DMSO	1	8	304.137	249.798	0
DMSO	1	8	306.57	246.553	225
DMSO	1	8	308.192	242.498	450
DMSO	1	8	311.436	241.687	675
DMSO	1	8	307.381	242.498	900
DMSO	1	8	307.381	242.498	1125
DMSO	1	8	309.003	242.498	1350
DMSO	1	8	310.625	243.309	1575
DMSO	1	8	311.436	240.876	1800
DMSO	1	8	311.436	239.254	2025
DMSO	1	8	313.869	239.254	2250
DMSO	1	8	315.491	238.443	2475
DMSO	1	8	313.869	239.254	2700
DMSO	1	8	317.924	238.443	2925
DMSO	1	8	320.357	236.01	3150
DMSO	1	8	317.924	236.821	3375
DMSO	1	8	317.113	238.443	3600
DMSO	1	8	317.113	238.443	3825
DMSO	1	8	320.357	238.443	4050
DMSO	1	8	321.168	235.199	4275
DMSO	1	8	320.357	236.821	4500
DMSO	1	8	320.357	236.821	4725
DMSO	1	8	317.924	239.254	4950
DMSO	1	8	320.357	237.632	5175
DMSO	1	8	319.546	237.632	5400
DMSO	1	8	322.79	236.821	5625
DMSO	1	8	323.601	237.632	5850
DMSO	1	8	324.412	237.632	6075
DMSO	1	8	325.223	237.632	6300
DMSO	1	8	323.601	237.632	6525
DMSO	1	8	325.223	241.687	6750
DMSO	1	8	325.223	240.876	6975
DMSO	1	8	328.468	240.876	7200
DMSO	1	8	326.035	242.498	7425
DMSO	1	8	326.846	244.931	7650
DMSO	1	8	328.468	245.742	7875
DMSO	1	8	329.279	244.931	8100
DMSO	1	8	329.279	244.931	8325
DMSO	1	8	330.09	247.364	8550
DMSO	1	8	331.712	246.553	8775
DMSO	1	8	333.334	244.12	9000
DMSO	1	8	333.334	245.742	9225
DMSO	1	8	332.523	245.742	9450
DMSO	1	8	332.523	245.742	9675
DMSO	1	8	332.523	245.742	9900
DMSO	1	8	335.767	251.42	10125
DMSO	1	8	335.767	249.798	10350
DMSO	1	8	335.767	248.987	10575
DMSO	1	8	332.523	252.231	10800
DMSO	1	9	307.381	284.672	0
DMSO	1	9	305.759	284.672	225
DMSO	1	9	313.058	282.239	450
DMSO	1	9	312.247	281.428	675
DMSO	1	9	315.491	279.806	900
DMSO	1	9	317.113	277.373	1125
DMSO	1	9	317.924	281.428	1350
DMSO	1	9	317.924	279.806	1575
DMSO	1	9	317.113	278.184	1800
DMSO	1	9	317.924	276.562	2025
DMSO	1	9	318.735	277.373	2250
DMSO	1	9	320.357	276.562	2475
DMSO	1	9	320.357	277.373	2700
DMSO	1	9	321.168	275.751	2925
DMSO	1	9	321.979	276.562	3150
DMSO	1	9	322.79	274.94	3375
DMSO	1	9	321.168	278.184	3600
DMSO	1	9	322.79	274.94	3825
DMSO	1	9	321.979	274.129	4050
DMSO	1	9	322.79	272.506	4275
DMSO	1	9	324.412	274.129	4500
DMSO	1	9	320.357	274.129	4725
DMSO	1	9	321.168	274.94	4950
DMSO	1	9	321.168	274.94	5175
DMSO	1	9	320.357	274.94	5400
DMSO	1	9	321.168	275.751	5625
DMSO	1	9	321.168	275.751	5850
DMSO	1	9	320.357	275.751	6075
DMSO	1	9	321.979	274.94	6300
DMSO	1	9	320.357	275.751	6525
DMSO	1	9	321.168	274.94	6750
DMSO	1	9	320.357	277.373	6975
DMSO	1	9	320.357	278.184	7200
DMSO	1	9	318.735	283.861	7425
DMSO	1	9	320.357	278.995	7650
DMSO	1	9	321.168	279.806	7875
DMSO	1	9	323.601	278.184	8100
DMSO	1	9	323.601	280.617	8325
DMSO	1	9	324.412	280.617	8550
DMSO	1	9	323.601	278.995	8775
DMSO	1	9	324.412	278.184	9000
DMSO	1	9	323.601	278.184	9225
DMSO	1	9	322.79	280.617	9450
DMSO	1	9	323.601	278.184	9675
DMSO	1	9	324.412	279.806	9900
DMSO	1	9	323.601	278.995	10125
DMSO	1	9	323.601	278.184	10350
DMSO	1	9	323.601	278.184	10575
DMSO	1	9	323.601	279.806	10800
DMSO	1	10	407.138	326.846	0
DMSO	1	10	407.949	317.924	225
DMSO	1	10	403.082	317.113	450
DMSO	1	10	403.894	314.68	675
DMSO	1	10	404.705	307.381	900
DMSO	1	10	404.705	308.192	1125
DMSO	1	10	403.082	307.381	1350
DMSO	1	10	400.649	304.137	1575
DMSO	1	10	400.649	303.326	1800
DMSO	1	10	401.46	302.515	2025
DMSO	1	10	397.405	300.893	2250
DMSO	1	10	397.405	298.459	2475
DMSO	1	10	394.972	297.648	2700
DMSO	1	10	391.728	296.026	2925
DMSO	1	10	391.728	297.648	3150
DMSO	1	10	391.728	296.026	3375
DMSO	1	10	394.161	296.026	3600
DMSO	1	10	391.728	294.404	3825
DMSO	1	10	391.728	292.782	4050
DMSO	1	10	390.106	292.782	4275
DMSO	1	10	386.051	293.593	4500
DMSO	1	10	387.673	293.593	4725
DMSO	1	10	385.24	292.782	4950
DMSO	1	10	381.996	293.593	5175
DMSO	1	10	381.996	292.782	5400
DMSO	1	10	378.752	292.782	5625
DMSO	1	10	375.507	291.971	5850
DMSO	1	10	371.452	287.916	6075
DMSO	1	10	369.019	287.916	6300
DMSO	1	10	369.019	287.105	6525
DMSO	1	10	369.019	287.916	6750
DMSO	1	10	369.019	291.16	6975
DMSO	1	10	366.586	291.16	7200
DMSO	1	10	365.775	291.16	7425
DMSO	1	10	365.775	292.782	7650
DMSO	1	10	368.208	294.404	7875
DMSO	1	10	365.775	294.404	8100
DMSO	1	10	363.342	296.837	8325
DMSO	1	10	360.098	297.648	8550
DMSO	1	10	362.531	298.459	8775
DMSO	1	10	363.342	297.648	9000
DMSO	1	10	361.72	297.648	9225
DMSO	1	10	362.531	298.459	9450
DMSO	1	10	361.72	298.459	9675
DMSO	1	10	360.098	298.459	9900
DMSO	1	10	359.287	300.893	10125
DMSO	1	10	359.287	300.082	10350
DMSO	1	10	361.72	301.704	10575
DMSO	1	10	359.287	300.082	10800
DMSO	1	11	403.082	291.971	0
DMSO	1	11	402.271	288.727	225
DMSO	1	11	407.138	287.105	450
DMSO	1	11	403.082	281.428	675
DMSO	1	11	403.894	283.05	900
DMSO	1	11	400.649	279.806	1125
DMSO	1	11	399.838	280.617	1350
DMSO	1	11	401.46	278.184	1575
DMSO	1	11	401.46	276.562	1800
DMSO	1	11	401.46	274.94	2025
DMSO	1	11	397.405	271.695	2250
DMSO	1	11	396.594	270.884	2475
DMSO	1	11	401.46	271.695	2700
DMSO	1	11	397.405	268.451	2925
DMSO	1	11	394.972	271.695	3150
DMSO	1	11	394.161	269.262	3375
DMSO	1	11	394.972	270.884	3600
DMSO	1	11	391.728	268.451	3825
DMSO	1	11	390.106	267.64	4050
DMSO	1	11	392.539	269.262	4275
DMSO	1	11	391.728	268.451	4500
DMSO	1	11	388.484	267.64	4725
DMSO	1	11	388.484	266.018	4950
DMSO	1	11	388.484	264.396	5175
DMSO	1	11	389.295	267.64	5400
DMSO	1	11	386.862	267.64	5625
DMSO	1	11	383.618	265.207	5850
DMSO	1	11	381.996	265.207	6075
DMSO	1	11	380.374	264.396	6300
DMSO	1	11	379.563	264.396	6525
DMSO	1	11	378.752	267.64	6750
DMSO	1	11	379.563	268.451	6975
DMSO	1	11	378.752	268.451	7200
DMSO	1	11	376.318	270.884	7425
DMSO	1	11	377.941	271.695	7650
DMSO	1	11	378.752	272.506	7875
DMSO	1	11	380.374	271.695	8100
DMSO	1	11	378.752	271.695	8325
DMSO	1	11	376.318	274.94	8550
DMSO	1	11	376.318	274.94	8775
DMSO	1	11	374.696	272.506	9000
DMSO	1	11	376.318	274.129	9225
DMSO	1	11	374.696	275.751	9450
DMSO	1	11	372.263	274.129	9675
DMSO	1	11	372.263	274.129	9900
DMSO	1	11	375.507	278.184	10125
DMSO	1	11	374.696	275.751	10350
DMSO	1	11	372.263	277.373	10575
DMSO	1	11	373.885	276.562	10800
DMSO	1	12	405.516	264.396	0
DMSO	1	12	403.082	257.097	225
DMSO	1	12	405.516	257.097	450
DMSO	1	12	403.082	257.097	675
DMSO	1	12	398.216	254.664	900
DMSO	1	12	398.216	256.286	1125
DMSO	1	12	398.216	254.664	1350
DMSO	1	12	398.216	252.231	1575
DMSO	1	12	398.216	250.609	1800
DMSO	1	12	401.46	250.609	2025
DMSO	1	12	397.405	248.176	2250
DMSO	1	12	395.783	248.176	2475
DMSO	1	12	400.649	250.609	2700
DMSO	1	12	397.405	248.176	2925
DMSO	1	12	399.027	245.742	3150
DMSO	1	12	400.649	245.742	3375
DMSO	1	12	399.027	243.309	3600
DMSO	1	12	396.594	245.742	3825
DMSO	1	12	400.649	242.498	4050
DMSO	1	12	399.838	243.309	4275
DMSO	1	12	399.838	243.309	4500
DMSO	1	12	397.405	241.687	4725
DMSO	1	12	396.594	242.498	4950
DMSO	1	12	399.838	245.742	5175
DMSO	1	12	399.838	247.364	5400
DMSO	1	12	397.405	244.931	5625
DMSO	1	12	391.728	242.498	5850
DMSO	1	12	390.917	244.931	6075
DMSO	1	12	390.917	245.742	6300
DMSO	1	12	390.106	245.742	6525
DMSO	1	12	388.484	246.553	6750
DMSO	1	12	388.484	247.364	6975
DMSO	1	12	386.051	248.987	7200
DMSO	1	12	386.051	248.987	7425
DMSO	1	12	387.673	250.609	7650
DMSO	1	12	387.673	249.798	7875
DMSO	1	12	381.996	248.987	8100
DMSO	1	12	381.996	249.798	8325
DMSO	1	12	380.374	251.42	8550
DMSO	1	12	379.563	251.42	8775
DMSO	1	12	379.563	250.609	9000
DMSO	1	12	379.563	250.609	9225
DMSO	1	12	375.507	252.231	9450
DMSO	1	12	373.074	253.853	9675
DMSO	1	12	373.885	255.475	9900
DMSO	1	12	373.074	256.286	10125
DMSO	1	12	369.83	258.719	10350
DMSO	1	12	366.586	257.097	10575
DMSO	1	12	367.397	257.097	10800
DMSO	1	13	394.972	343.877	0
DMSO	1	13	398.216	341.444	225
DMSO	1	13	401.46	342.255	450
DMSO	1	13	401.46	338.2	675
DMSO	1	13	397.405	336.578	900
DMSO	1	13	399.838	336.578	1125
DMSO	1	13	398.216	333.334	1350
DMSO	1	13	397.405	333.334	1575
DMSO	1	13	397.405	331.712	1800
DMSO	1	13	399.027	330.09	2025
DMSO	1	13	399.838	330.09	2250
DMSO	1	13	394.972	330.09	2475
DMSO	1	13	392.539	332.523	2700
DMSO	1	13	390.106	328.468	2925
DMSO	1	13	393.35	330.09	3150
DMSO	1	13	388.484	326.035	3375
DMSO	1	13	388.484	327.657	3600
DMSO	1	13	387.673	328.468	3825
DMSO	1	13	385.24	328.468	4050
DMSO	1	13	386.051	328.468	4275
DMSO	1	13	385.24	326.846	4500
DMSO	1	13	382.807	330.901	4725
DMSO	1	13	379.563	327.657	4950
DMSO	1	13	378.752	330.901	5175
DMSO	1	13	377.129	334.956	5400
DMSO	1	13	373.885	333.334	5625
DMSO	1	13	372.263	330.901	5850
DMSO	1	13	369.019	331.712	6075
DMSO	1	13	366.586	330.09	6300
DMSO	1	13	364.964	326.846	6525
DMSO	1	13	361.72	326.846	6750
DMSO	1	13	362.531	326.846	6975
DMSO	1	13	361.72	330.09	7200
DMSO	1	13	359.287	330.09	7425
DMSO	1	13	359.287	328.468	7650
DMSO	1	13	359.287	328.468	7875
DMSO	1	13	359.287	327.657	8100
DMSO	1	13	362.531	330.09	8325
DMSO	1	13	360.909	328.468	8550
DMSO	1	13	361.72	329.279	8775
DMSO	1	13	362.531	326.846	9000
DMSO	1	13	359.287	326.846	9225
DMSO	1	13	358.476	326.846	9450
DMSO	1	13	359.287	326.846	9675
DMSO	1	13	360.098	322.79	9900
DMSO	1	13	360.909	324.412	10125
DMSO	1	13	362.531	327.657	10350
DMSO	1	13	356.854	323.601	10575
DMSO	1	13	361.72	326.035	10800
DMSO	1	14	414.437	268.451	0
DMSO	1	14	414.437	269.262	225
DMSO	1	14	413.626	268.451	450
DMSO	1	14	413.626	266.018	675
DMSO	1	14	412.815	263.585	900
DMSO	1	14	412.004	261.963	1125
DMSO	1	14	412.004	265.207	1350
DMSO	1	14	414.437	261.152	1575
DMSO	1	14	411.193	258.719	1800
DMSO	1	14	409.571	260.341	2025
DMSO	1	14	407.949	261.963	2250
DMSO	1	14	404.705	261.963	2475
DMSO	1	14	407.138	261.152	2700
DMSO	1	14	403.894	261.152	2925
DMSO	1	14	403.082	261.963	3150
DMSO	1	14	403.082	261.963	3375
DMSO	1	14	403.082	263.585	3600
DMSO	1	14	402.271	261.963	3825
DMSO	1	14	401.46	265.207	4050
DMSO	1	14	400.649	264.396	4275
DMSO	1	14	400.649	261.963	4500
DMSO	1	14	399.838	263.585	4725
DMSO	1	14	398.216	261.963	4950
DMSO	1	14	397.405	261.152	5175
DMSO	1	14	397.405	261.963	5400
DMSO	1	14	397.405	261.963	5625
DMSO	1	14	396.594	263.585	5850
DMSO	1	14	394.972	261.152	6075
DMSO	1	14	392.539	261.963	6300
DMSO	1	14	390.917	260.341	6525
DMSO	1	14	391.728	259.53	6750
DMSO	1	14	391.728	260.341	6975
DMSO	1	14	390.106	261.963	7200
DMSO	1	14	390.917	261.152	7425
DMSO	1	14	392.539	260.341	7650
DMSO	1	14	389.295	258.719	7875
DMSO	1	14	389.295	260.341	8100
DMSO	1	14	388.484	258.719	8325
DMSO	1	14	389.295	260.341	8550
DMSO	1	14	388.484	259.53	8775
DMSO	1	14	385.24	257.908	9000
DMSO	1	14	387.673	258.719	9225
DMSO	1	14	386.051	257.908	9450
DMSO	1	14	384.429	259.53	9675
DMSO	1	14	383.618	258.719	9900
DMSO	1	14	383.618	255.475	10125
DMSO	1	14	381.996	256.286	10350
DMSO	1	14	381.185	257.908	10575
DMSO	1	14	380.374	257.097	10800
DMSO	1	15	407.138	246.553	0
DMSO	1	15	404.705	240.065	225
DMSO	1	15	404.705	243.309	450
DMSO	1	15	403.894	243.309	675
DMSO	1	15	403.082	244.12	900
DMSO	1	15	398.216	241.687	1125
DMSO	1	15	398.216	243.309	1350
DMSO	1	15	402.271	244.12	1575
DMSO	1	15	400.649	242.498	1800
DMSO	1	15	399.838	240.065	2025
DMSO	1	15	399.838	238.443	2250
DMSO	1	15	400.649	236.01	2475
DMSO	1	15	401.46	237.632	2700
DMSO	1	15	401.46	234.388	2925
DMSO	1	15	399.027	232.766	3150
DMSO	1	15	397.405	232.766	3375
DMSO	1	15	396.594	230.333	3600
DMSO	1	15	398.216	231.144	3825
DMSO	1	15	399.027	228.711	4050
DMSO	1	15	398.216	228.711	4275
DMSO	1	15	399.838	229.522	4500
DMSO	1	15	395.783	227.9	4725
DMSO	1	15	394.972	229.522	4950
DMSO	1	15	393.35	226.278	5175
DMSO	1	15	391.728	229.522	5400
DMSO	1	15	390.106	227.089	5625
DMSO	1	15	388.484	227.089	5850
DMSO	1	15	388.484	230.333	6075
DMSO	1	15	384.429	232.766	6300
DMSO	1	15	385.24	233.577	6525
DMSO	1	15	384.429	236.01	6750
DMSO	1	15	382.807	236.01	6975
DMSO	1	15	381.996	238.443	7200
DMSO	1	15	383.618	237.632	7425
DMSO	1	15	381.996	242.498	7650
DMSO	1	15	379.563	238.443	7875
DMSO	1	15	379.563	240.876	8100
DMSO	1	15	375.507	238.443	8325
DMSO	1	15	373.885	241.687	8550
DMSO	1	15	373.885	241.687	8775
DMSO	1	15	374.696	241.687	9000
DMSO	1	15	373.885	242.498	9225
DMSO	1	15	369.019	244.12	9450
DMSO	1	15	369.019	244.12	9675
DMSO	1	15	366.586	248.987	9900
DMSO	1	15	366.586	247.364	10125
DMSO	1	15	364.964	248.176	10350
DMSO	1	15	362.531	245.742	10575
DMSO	1	15	364.153	246.553	10800
DMSO	1	16	403.894	336.578	0
DMSO	1	16	403.082	330.901	225
DMSO	1	16	394.972	326.846	450
DMSO	1	16	395.783	327.657	675
DMSO	1	16	393.35	320.357	900
DMSO	1	16	393.35	323.601	1125
DMSO	1	16	388.484	318.735	1350
DMSO	1	16	387.673	319.546	1575
DMSO	1	16	386.051	314.68	1800
DMSO	1	16	384.429	313.869	2025
DMSO	1	16	385.24	313.869	2250
DMSO	1	16	386.051	313.869	2475
DMSO	1	16	388.484	313.058	2700
DMSO	1	16	386.051	311.436	2925
DMSO	1	16	388.484	313.869	3150
DMSO	1	16	385.24	310.625	3375
DMSO	1	16	386.862	310.625	3600
DMSO	1	16	385.24	309.003	3825
DMSO	1	16	385.24	308.192	4050
DMSO	1	16	383.618	308.192	4275
DMSO	1	16	384.429	307.381	4500
DMSO	1	16	383.618	307.381	4725
DMSO	1	16	378.752	304.948	4950
DMSO	1	16	377.941	306.57	5175
DMSO	1	16	377.941	306.57	5400
DMSO	1	16	378.752	304.948	5625
DMSO	1	16	377.941	304.948	5850
DMSO	1	16	375.507	304.137	6075
DMSO	1	16	372.263	303.326	6300
DMSO	1	16	370.641	303.326	6525
DMSO	1	16	370.641	304.948	6750
DMSO	1	16	369.83	304.948	6975
DMSO	1	16	369.83	305.759	7200
DMSO	1	16	369.83	309.003	7425
DMSO	1	16	370.641	308.192	7650
DMSO	1	16	367.397	307.381	7875
DMSO	1	16	365.775	305.759	8100
DMSO	1	16	364.964	306.57	8325
DMSO	1	16	365.775	307.381	8550
DMSO	1	16	365.775	308.192	8775
DMSO	1	16	365.775	309.003	9000
DMSO	1	16	362.531	309.003	9225
DMSO	1	16	362.531	308.192	9450
DMSO	1	16	364.153	309.003	9675
DMSO	1	16	365.775	309.003	9900
DMSO	1	16	365.775	309.814	10125
DMSO	1	16	365.775	309.003	10350
DMSO	1	16	363.342	309.814	10575
DMSO	1	16	363.342	307.381	10800
DMSO	1	17	399.027	309.814	0
DMSO	1	17	397.405	306.57	225
DMSO	1	17	399.027	302.515	450
DMSO	1	17	394.972	300.893	675
DMSO	1	17	395.783	299.27	900
DMSO	1	17	394.161	302.515	1125
DMSO	1	17	391.728	296.837	1350
DMSO	1	17	391.728	294.404	1575
DMSO	1	17	391.728	294.404	1800
DMSO	1	17	390.917	294.404	2025
DMSO	1	17	390.917	292.782	2250
DMSO	1	17	390.917	287.916	2475
DMSO	1	17	389.295	290.349	2700
DMSO	1	17	391.728	288.727	2925
DMSO	1	17	390.917	287.916	3150
DMSO	1	17	388.484	287.105	3375
DMSO	1	17	389.295	288.727	3600
DMSO	1	17	390.917	287.105	3825
DMSO	1	17	386.862	287.105	4050
DMSO	1	17	385.24	283.05	4275
DMSO	1	17	387.673	284.672	4500
DMSO	1	17	390.917	285.483	4725
DMSO	1	17	385.24	283.861	4950
DMSO	1	17	386.051	284.672	5175
DMSO	1	17	386.051	284.672	5400
DMSO	1	17	385.24	285.483	5625
DMSO	1	17	381.996	283.05	5850
DMSO	1	17	382.807	283.05	6075
DMSO	1	17	377.129	281.428	6300
DMSO	1	17	377.129	278.995	6525
DMSO	1	17	375.507	283.05	6750
DMSO	1	17	375.507	283.05	6975
DMSO	1	17	375.507	281.428	7200
DMSO	1	17	373.885	283.05	7425
DMSO	1	17	372.263	284.672	7650
DMSO	1	17	373.885	283.05	7875
DMSO	1	17	372.263	282.239	8100
DMSO	1	17	375.507	287.916	8325
DMSO	1	17	373.074	285.483	8550
DMSO	1	17	370.641	284.672	8775
DMSO	1	17	369.019	280.617	9000
DMSO	1	17	369.019	282.239	9225
DMSO	1	17	369.019	281.428	9450
DMSO	1	17	369.019	282.239	9675
DMSO	1	17	369.83	283.861	9900
DMSO	1	17	369.83	285.483	10125
DMSO	1	17	369.019	283.861	10350
DMSO	1	17	369.83	283.05	10575
DMSO	1	17	368.208	282.239	10800
DMSO	1	18	414.437	229.522	0
DMSO	1	18	416.059	224.656	225
DMSO	1	18	413.626	227.089	450
DMSO	1	18	410.382	227.9	675
DMSO	1	18	410.382	225.467	900
DMSO	1	18	408.76	227.9	1125
DMSO	1	18	405.516	229.522	1350
DMSO	1	18	404.705	229.522	1575
DMSO	1	18	403.894	229.522	1800
DMSO	1	18	404.705	226.278	2025
DMSO	1	18	403.082	225.467	2250
DMSO	1	18	403.894	225.467	2475
DMSO	1	18	404.705	226.278	2700
DMSO	1	18	403.894	227.9	2925
DMSO	1	18	401.46	222.223	3150
DMSO	1	18	399.027	222.223	3375
DMSO	1	18	399.838	220.6	3600
DMSO	1	18	398.216	223.034	3825
DMSO	1	18	399.027	223.034	4050
DMSO	1	18	399.838	219.789	4275
DMSO	1	18	398.216	218.978	4500
DMSO	1	18	398.216	219.789	4725
DMSO	1	18	396.594	218.167	4950
DMSO	1	18	393.35	218.167	5175
DMSO	1	18	393.35	219.789	5400
DMSO	1	18	390.106	221.411	5625
DMSO	1	18	389.295	220.6	5850
DMSO	1	18	386.862	223.034	6075
DMSO	1	18	380.374	222.223	6300
DMSO	1	18	381.996	223.845	6525
DMSO	1	18	378.752	227.9	6750
DMSO	1	18	377.941	226.278	6975
DMSO	1	18	376.318	226.278	7200
DMSO	1	18	375.507	225.467	7425
DMSO	1	18	377.129	228.711	7650
DMSO	1	18	375.507	227.089	7875
DMSO	1	18	375.507	227.9	8100
DMSO	1	18	372.263	229.522	8325
DMSO	1	18	372.263	229.522	8550
DMSO	1	18	371.452	228.711	8775
DMSO	1	18	370.641	230.333	9000
DMSO	1	18	365.775	232.766	9225
DMSO	1	18	365.775	233.577	9450
DMSO	1	18	367.397	231.144	9675
DMSO	1	18	362.531	229.522	9900
DMSO	1	18	360.909	236.01	10125
DMSO	1	18	360.909	239.254	10350
DMSO	1	18	358.476	240.876	10575
DMSO	1	18	356.854	240.065	10800
DMSO	1	19	298.459	359.287	0
DMSO	1	19	302.515	354.421	225
DMSO	1	19	304.948	354.421	450
DMSO	1	19	306.57	353.61	675
DMSO	1	19	308.192	352.799	900
DMSO	1	19	309.003	352.799	1125
DMSO	1	19	312.247	347.932	1350
DMSO	1	19	310.625	347.121	1575
DMSO	1	19	313.058	346.31	1800
DMSO	1	19	313.058	347.932	2025
DMSO	1	19	313.058	345.499	2250
DMSO	1	19	313.869	342.255	2475
DMSO	1	19	312.247	341.444	2700
DMSO	1	19	317.924	339.822	2925
DMSO	1	19	321.979	343.877	3150
DMSO	1	19	323.601	340.633	3375
DMSO	1	19	324.412	339.011	3600
DMSO	1	19	326.846	339.822	3825
DMSO	1	19	329.279	334.956	4050
DMSO	1	19	330.09	335.767	4275
DMSO	1	19	331.712	330.901	4500
DMSO	1	19	333.334	331.712	4725
DMSO	1	19	333.334	330.09	4950
DMSO	1	19	333.334	332.523	5175
DMSO	1	19	336.578	332.523	5400
DMSO	1	19	337.389	329.279	5625
DMSO	1	19	337.389	326.846	5850
DMSO	1	19	337.389	323.601	6075
DMSO	1	19	337.389	322.79	6300
DMSO	1	19	339.822	321.979	6525
DMSO	1	19	339.011	321.979	6750
DMSO	1	19	338.2	322.79	6975
DMSO	1	19	340.633	320.357	7200
DMSO	1	19	341.444	320.357	7425
DMSO	1	19	340.633	320.357	7650
DMSO	1	19	340.633	320.357	7875
DMSO	1	19	340.633	321.168	8100
DMSO	1	19	343.066	320.357	8325
DMSO	1	19	343.066	318.735	8550
DMSO	1	19	343.066	320.357	8775
DMSO	1	19	341.444	317.924	9000
DMSO	1	19	343.066	315.491	9225
DMSO	1	19	343.066	317.113	9450
DMSO	1	19	343.877	316.302	9675
DMSO	1	19	343.877	316.302	9900
DMSO	1	19	343.877	317.113	10125
DMSO	1	19	345.499	314.68	10350
DMSO	1	19	346.31	313.869	10575
DMSO	1	19	346.31	312.247	10800
DMSO	2	1	220.062	350.469	0
DMSO	2	1	223.322	343.949	225
DMSO	2	1	220.877	346.394	450
DMSO	2	1	223.322	344.764	675
DMSO	2	1	222.507	348.024	900
DMSO	2	1	223.322	348.024	1125
DMSO	2	1	224.137	343.134	1350
DMSO	2	1	226.582	344.764	1575
DMSO	2	1	226.582	343.134	1800
DMSO	2	1	227.397	340.689	2025
DMSO	2	1	227.397	343.949	2250
DMSO	2	1	229.843	340.689	2475
DMSO	2	1	233.103	339.874	2700
DMSO	2	1	229.843	339.874	2925
DMSO	2	1	232.288	343.134	3150
DMSO	2	1	230.658	343.134	3375
DMSO	2	1	232.288	343.134	3600
DMSO	2	1	233.918	342.319	3825
DMSO	2	1	233.918	342.319	4050
DMSO	2	1	237.993	339.058	4275
DMSO	2	1	233.103	339.874	4500
DMSO	2	1	237.993	339.058	4725
DMSO	2	1	240.438	338.243	4950
DMSO	2	1	235.548	340.689	5175
DMSO	2	1	239.623	339.874	5400
DMSO	2	1	237.993	338.243	5625
DMSO	2	1	234.733	341.504	5850
DMSO	2	1	238.808	338.243	6075
DMSO	2	1	239.623	334.983	6300
DMSO	2	1	238.808	337.428	6525
DMSO	2	1	239.623	339.058	6750
DMSO	2	1	240.438	337.428	6975
DMSO	2	1	239.623	338.243	7200
DMSO	2	1	238.808	335.798	7425
DMSO	2	1	239.623	336.613	7650
DMSO	2	1	242.068	338.243	7875
DMSO	2	1	241.253	338.243	8100
DMSO	2	1	242.883	336.613	8325
DMSO	2	1	245.328	336.613	8550
DMSO	2	1	245.328	334.983	8775
DMSO	2	1	249.404	333.353	9000
DMSO	2	1	251.034	334.983	9225
DMSO	2	1	253.479	334.168	9450
DMSO	2	1	255.109	331.723	9675
DMSO	2	1	255.924	329.278	9900
DMSO	2	1	255.924	328.463	10125
DMSO	2	1	255.924	330.093	10350
DMSO	2	1	259.999	328.463	10575
DMSO	2	1	259.999	326.018	10800
DMSO	2	2	227.397	360.25	0
DMSO	2	2	229.843	355.359	225
DMSO	2	2	224.952	354.544	450
DMSO	2	2	225.767	352.914	675
DMSO	2	2	229.843	354.544	900
DMSO	2	2	229.843	352.099	1125
DMSO	2	2	233.103	354.544	1350
DMSO	2	2	234.733	351.284	1575
DMSO	2	2	233.103	350.469	1800
DMSO	2	2	235.548	352.099	2025
DMSO	2	2	236.363	351.284	2250
DMSO	2	2	239.623	348.839	2475
DMSO	2	2	241.253	346.394	2700
DMSO	2	2	237.993	348.024	2925
DMSO	2	2	239.623	349.654	3150
DMSO	2	2	242.883	348.839	3375
DMSO	2	2	240.438	351.284	3600
DMSO	2	2	246.143	348.024	3825
DMSO	2	2	246.143	348.839	4050
DMSO	2	2	244.513	348.024	4275
DMSO	2	2	246.143	348.024	4500
DMSO	2	2	246.958	346.394	4725
DMSO	2	2	247.774	346.394	4950
DMSO	2	2	246.143	346.394	5175
DMSO	2	2	247.774	345.579	5400
DMSO	2	2	242.883	347.209	5625
DMSO	2	2	243.698	347.209	5850
DMSO	2	2	245.328	348.024	6075
DMSO	2	2	248.589	345.579	6300
DMSO	2	2	250.219	343.134	6525
DMSO	2	2	249.404	342.319	6750
DMSO	2	2	250.219	343.949	6975
DMSO	2	2	248.589	344.764	7200
DMSO	2	2	251.849	341.504	7425
DMSO	2	2	252.664	341.504	7650
DMSO	2	2	254.294	342.319	7875
DMSO	2	2	255.924	339.874	8100
DMSO	2	2	256.739	339.874	8325
DMSO	2	2	255.924	339.874	8550
DMSO	2	2	259.184	338.243	8775
DMSO	2	2	259.184	338.243	9000
DMSO	2	2	260.814	339.058	9225
DMSO	2	2	260.814	338.243	9450
DMSO	2	2	259.999	339.874	9675
DMSO	2	2	262.444	339.058	9900
DMSO	2	2	264.074	336.613	10125
DMSO	2	2	264.889	334.983	10350
DMSO	2	2	266.52	334.983	10575
DMSO	2	2	266.52	334.983	10800
DMSO	2	3	219.247	335.798	0
DMSO	2	3	218.432	334.983	225
DMSO	2	3	220.062	333.353	450
DMSO	2	3	221.692	334.168	675
DMSO	2	3	220.877	334.168	900
DMSO	2	3	222.507	334.983	1125
DMSO	2	3	221.692	334.983	1350
DMSO	2	3	222.507	334.983	1575
DMSO	2	3	223.322	334.983	1800
DMSO	2	3	222.507	334.983	2025
DMSO	2	3	222.507	335.798	2250
DMSO	2	3	222.507	334.983	2475
DMSO	2	3	223.322	331.723	2700
DMSO	2	3	223.322	332.538	2925
DMSO	2	3	224.137	334.983	3150
DMSO	2	3	224.137	335.798	3375
DMSO	2	3	225.767	336.613	3600
DMSO	2	3	226.582	335.798	3825
DMSO	2	3	229.027	334.983	4050
DMSO	2	3	226.582	334.168	4275
DMSO	2	3	228.212	331.723	4500
DMSO	2	3	229.027	333.353	4725
DMSO	2	3	230.658	333.353	4950
DMSO	2	3	229.843	334.168	5175
DMSO	2	3	233.918	331.723	5400
DMSO	2	3	234.733	331.723	5625
DMSO	2	3	233.918	331.723	5850
DMSO	2	3	236.363	330.908	6075
DMSO	2	3	239.623	328.463	6300
DMSO	2	3	237.993	328.463	6525
DMSO	2	3	239.623	327.648	6750
DMSO	2	3	239.623	328.463	6975
DMSO	2	3	240.438	326.833	7200
DMSO	2	3	240.438	326.833	7425
DMSO	2	3	239.623	326.833	7650
DMSO	2	3	239.623	328.463	7875
DMSO	2	3	240.438	328.463	8100
DMSO	2	3	241.253	325.203	8325
DMSO	2	3	242.068	326.833	8550
DMSO	2	3	242.883	325.203	8775
DMSO	2	3	244.513	321.127	9000
DMSO	2	3	244.513	321.943	9225
DMSO	2	3	246.143	319.497	9450
DMSO	2	3	246.143	321.943	9675
DMSO	2	3	247.774	321.943	9900
DMSO	2	3	250.219	321.943	10125
DMSO	2	3	251.034	319.497	10350
DMSO	2	3	252.664	317.052	10575
DMSO	2	3	251.034	317.052	10800
DMSO	2	4	210.281	313.792	0
DMSO	2	4	211.097	312.162	225
DMSO	2	4	213.542	312.162	450
DMSO	2	4	215.172	311.347	675
DMSO	2	4	213.542	309.717	900
DMSO	2	4	213.542	311.347	1125
DMSO	2	4	216.802	312.162	1350
DMSO	2	4	216.802	313.792	1575
DMSO	2	4	216.802	312.162	1800
DMSO	2	4	219.247	314.607	2025
DMSO	2	4	220.062	315.422	2250
DMSO	2	4	220.062	312.162	2475
DMSO	2	4	221.692	315.422	2700
DMSO	2	4	222.507	315.422	2925
DMSO	2	4	222.507	317.052	3150
DMSO	2	4	222.507	317.052	3375
DMSO	2	4	223.322	319.497	3600
DMSO	2	4	225.767	320.312	3825
DMSO	2	4	226.582	320.312	4050
DMSO	2	4	226.582	319.497	4275
DMSO	2	4	225.767	317.867	4500
DMSO	2	4	223.322	318.682	4725
DMSO	2	4	229.027	318.682	4950
DMSO	2	4	229.027	318.682	5175
DMSO	2	4	229.843	319.497	5400
DMSO	2	4	233.103	320.312	5625
DMSO	2	4	229.027	319.497	5850
DMSO	2	4	233.103	317.867	6075
DMSO	2	4	235.548	317.867	6300
DMSO	2	4	236.363	317.052	6525
DMSO	2	4	236.363	318.682	6750
DMSO	2	4	236.363	318.682	6975
DMSO	2	4	237.993	318.682	7200
DMSO	2	4	241.253	318.682	7425
DMSO	2	4	239.623	317.867	7650
DMSO	2	4	242.068	318.682	7875
DMSO	2	4	243.698	318.682	8100
DMSO	2	4	242.883	316.237	8325
DMSO	2	4	243.698	316.237	8550
DMSO	2	4	246.143	315.422	8775
DMSO	2	4	246.958	312.162	9000
DMSO	2	4	247.774	312.977	9225
DMSO	2	4	250.219	313.792	9450
DMSO	2	4	251.034	313.792	9675
DMSO	2	4	249.404	312.977	9900
DMSO	2	4	253.479	312.162	10125
DMSO	2	4	251.034	312.162	10350
DMSO	2	4	253.479	310.532	10575
DMSO	2	4	251.034	312.162	10800
DMSO	2	5	214.357	286.896	0
DMSO	2	5	213.542	282.82	225
DMSO	2	5	215.172	281.19	450
DMSO	2	5	214.357	282.82	675
DMSO	2	5	215.987	285.266	900
DMSO	2	5	215.987	283.635	1125
DMSO	2	5	216.802	284.451	1350
DMSO	2	5	217.617	283.635	1575
DMSO	2	5	217.617	282.82	1800
DMSO	2	5	215.987	284.451	2025
DMSO	2	5	213.542	286.081	2250
DMSO	2	5	217.617	286.081	2475
DMSO	2	5	220.062	286.081	2700
DMSO	2	5	220.877	286.896	2925
DMSO	2	5	221.692	285.266	3150
DMSO	2	5	220.062	286.896	3375
DMSO	2	5	223.322	288.526	3600
DMSO	2	5	224.137	288.526	3825
DMSO	2	5	224.952	289.341	4050
DMSO	2	5	224.137	290.971	4275
DMSO	2	5	225.767	290.156	4500
DMSO	2	5	225.767	290.971	4725
DMSO	2	5	227.397	293.416	4950
DMSO	2	5	226.582	295.046	5175
DMSO	2	5	229.027	295.046	5400
DMSO	2	5	228.212	295.861	5625
DMSO	2	5	229.843	295.861	5850
DMSO	2	5	232.288	294.231	6075
DMSO	2	5	233.103	295.046	6300
DMSO	2	5	233.918	295.861	6525
DMSO	2	5	234.733	297.491	6750
DMSO	2	5	236.363	297.491	6975
DMSO	2	5	238.808	296.676	7200
DMSO	2	5	239.623	295.861	7425
DMSO	2	5	240.438	295.861	7650
DMSO	2	5	242.883	296.676	7875
DMSO	2	5	242.883	297.491	8100
DMSO	2	5	245.328	298.306	8325
DMSO	2	5	245.328	299.121	8550
DMSO	2	5	246.143	299.936	8775
DMSO	2	5	247.774	299.121	9000
DMSO	2	5	249.404	298.306	9225
DMSO	2	5	250.219	299.121	9450
DMSO	2	5	250.219	299.121	9675
DMSO	2	5	251.034	298.306	9900
DMSO	2	5	250.219	299.121	10125
DMSO	2	5	251.849	300.751	10350
DMSO	2	5	252.664	299.121	10575
DMSO	2	5	254.294	295.861	10800
DMSO	2	6	220.062	263.259	0
DMSO	2	6	221.692	261.629	225
DMSO	2	6	220.062	256.739	450
DMSO	2	6	215.987	258.369	675
DMSO	2	6	216.802	258.369	900
DMSO	2	6	214.357	259.999	1125
DMSO	2	6	216.802	256.739	1350
DMSO	2	6	219.247	257.554	1575
DMSO	2	6	220.877	259.184	1800
DMSO	2	6	220.062	260.814	2025
DMSO	2	6	218.432	261.629	2250
DMSO	2	6	220.877	256.739	2475
DMSO	2	6	221.692	259.184	2700
DMSO	2	6	223.322	261.629	2925
DMSO	2	6	225.767	263.259	3150
DMSO	2	6	227.397	264.074	3375
DMSO	2	6	228.212	265.704	3600
DMSO	2	6	229.027	267.335	3825
DMSO	2	6	227.397	268.15	4050
DMSO	2	6	228.212	266.52	4275
DMSO	2	6	229.843	268.965	4500
DMSO	2	6	231.473	267.335	4725
DMSO	2	6	233.103	269.78	4950
DMSO	2	6	233.103	269.78	5175
DMSO	2	6	235.548	273.04	5400
DMSO	2	6	236.363	273.855	5625
DMSO	2	6	237.993	274.67	5850
DMSO	2	6	239.623	274.67	6075
DMSO	2	6	241.253	275.485	6300
DMSO	2	6	242.068	277.93	6525
DMSO	2	6	242.883	280.375	6750
DMSO	2	6	242.883	279.56	6975
DMSO	2	6	244.513	277.115	7200
DMSO	2	6	242.883	278.745	7425
DMSO	2	6	243.698	278.745	7650
DMSO	2	6	246.143	279.56	7875
DMSO	2	6	245.328	280.375	8100
DMSO	2	6	246.958	280.375	8325
DMSO	2	6	249.404	282.82	8550
DMSO	2	6	250.219	281.19	8775
DMSO	2	6	249.404	282.82	9000
DMSO	2	6	249.404	282.82	9225
DMSO	2	6	249.404	282.82	9450
DMSO	2	6	249.404	282.82	9675
DMSO	2	6	247.774	282.82	9900
DMSO	2	6	251.849	286.081	10125
DMSO	2	6	247.774	284.451	10350
DMSO	2	6	249.404	283.635	10575
DMSO	2	6	252.664	278.745	10800
DMSO	2	7	213.542	246.958	0
DMSO	2	7	220.062	250.219	225
DMSO	2	7	216.802	246.958	450
DMSO	2	7	214.357	244.513	675
DMSO	2	7	215.987	246.958	900
DMSO	2	7	216.802	247.774	1125
DMSO	2	7	216.802	247.774	1350
DMSO	2	7	216.802	247.774	1575
DMSO	2	7	216.802	248.589	1800
DMSO	2	7	216.802	248.589	2025
DMSO	2	7	218.432	248.589	2250
DMSO	2	7	221.692	246.958	2475
DMSO	2	7	223.322	246.958	2700
DMSO	2	7	224.952	247.774	2925
DMSO	2	7	228.212	248.589	3150
DMSO	2	7	227.397	249.404	3375
DMSO	2	7	229.843	251.034	3600
DMSO	2	7	229.027	253.479	3825
DMSO	2	7	231.473	251.034	4050
DMSO	2	7	230.658	252.664	4275
DMSO	2	7	232.288	253.479	4500
DMSO	2	7	233.103	254.294	4725
DMSO	2	7	238.808	256.739	4950
DMSO	2	7	239.623	258.369	5175
DMSO	2	7	237.178	258.369	5400
DMSO	2	7	237.178	256.739	5625
DMSO	2	7	241.253	259.184	5850
DMSO	2	7	242.883	262.444	6075
DMSO	2	7	244.513	264.074	6300
DMSO	2	7	245.328	263.259	6525
DMSO	2	7	246.958	265.704	6750
DMSO	2	7	249.404	265.704	6975
DMSO	2	7	250.219	266.52	7200
DMSO	2	7	250.219	265.704	7425
DMSO	2	7	251.034	267.335	7650
DMSO	2	7	252.664	265.704	7875
DMSO	2	7	251.034	268.15	8100
DMSO	2	7	255.109	269.78	8325
DMSO	2	7	255.924	269.78	8550
DMSO	2	7	256.739	269.78	8775
DMSO	2	7	257.554	271.41	9000
DMSO	2	7	257.554	274.67	9225
DMSO	2	7	257.554	271.41	9450
DMSO	2	7	259.184	273.04	9675
DMSO	2	7	259.184	273.855	9900
DMSO	2	7	258.369	276.3	10125
DMSO	2	7	258.369	277.115	10350
DMSO	2	7	259.999	274.67	10575
DMSO	2	7	259.999	272.225	10800
DMSO	2	8	202.131	295.861	0
DMSO	2	8	205.391	295.046	225
DMSO	2	8	204.576	293.416	450
DMSO	2	8	205.391	295.861	675
DMSO	2	8	206.206	295.861	900
DMSO	2	8	207.836	296.676	1125
DMSO	2	8	206.206	295.861	1350
DMSO	2	8	207.021	295.861	1575
DMSO	2	8	210.281	295.861	1800
DMSO	2	8	207.021	295.861	2025
DMSO	2	8	209.466	295.861	2250
DMSO	2	8	211.097	296.676	2475
DMSO	2	8	211.097	297.491	2700
DMSO	2	8	211.097	295.861	2925
DMSO	2	8	212.727	295.861	3150
DMSO	2	8	211.097	296.676	3375
DMSO	2	8	210.281	298.306	3600
DMSO	2	8	213.542	299.121	3825
DMSO	2	8	215.172	299.121	4050
DMSO	2	8	215.172	299.121	4275
DMSO	2	8	217.617	299.121	4500
DMSO	2	8	219.247	299.121	4725
DMSO	2	8	218.432	297.491	4950
DMSO	2	8	215.987	302.381	5175
DMSO	2	8	219.247	299.121	5400
DMSO	2	8	220.877	299.121	5625
DMSO	2	8	221.692	299.936	5850
DMSO	2	8	221.692	299.936	6075
DMSO	2	8	220.877	301.566	6300
DMSO	2	8	224.137	300.751	6525
DMSO	2	8	225.767	302.381	6750
DMSO	2	8	228.212	301.566	6975
DMSO	2	8	229.843	299.936	7200
DMSO	2	8	229.843	300.751	7425
DMSO	2	8	232.288	304.012	7650
DMSO	2	8	232.288	303.197	7875
DMSO	2	8	234.733	305.642	8100
DMSO	2	8	236.363	304.012	8325
DMSO	2	8	236.363	304.012	8550
DMSO	2	8	237.993	304.827	8775
DMSO	2	8	239.623	306.457	9000
DMSO	2	8	238.808	304.827	9225
DMSO	2	8	239.623	303.197	9450
DMSO	2	8	241.253	305.642	9675
DMSO	2	8	242.068	304.827	9900
DMSO	2	8	242.883	305.642	10125
DMSO	2	8	242.883	306.457	10350
DMSO	2	8	246.143	305.642	10575
DMSO	2	8	242.883	304.827	10800
DMSO	2	9	211.097	230.658	0
DMSO	2	9	213.542	233.103	225
DMSO	2	9	211.912	233.918	450
DMSO	2	9	213.542	234.733	675
DMSO	2	9	213.542	233.103	900
DMSO	2	9	211.912	233.918	1125
DMSO	2	9	211.912	236.363	1350
DMSO	2	9	213.542	236.363	1575
DMSO	2	9	214.357	236.363	1800
DMSO	2	9	215.172	234.733	2025
DMSO	2	9	217.617	233.918	2250
DMSO	2	9	218.432	233.103	2475
DMSO	2	9	219.247	234.733	2700
DMSO	2	9	220.062	235.548	2925
DMSO	2	9	223.322	234.733	3150
DMSO	2	9	224.137	234.733	3375
DMSO	2	9	225.767	237.993	3600
DMSO	2	9	226.582	237.178	3825
DMSO	2	9	229.027	237.993	4050
DMSO	2	9	229.843	237.993	4275
DMSO	2	9	231.473	239.623	4500
DMSO	2	9	229.843	238.808	4725
DMSO	2	9	233.918	240.438	4950
DMSO	2	9	236.363	242.883	5175
DMSO	2	9	237.993	242.068	5400
DMSO	2	9	237.993	243.698	5625
DMSO	2	9	240.438	245.328	5850
DMSO	2	9	242.068	248.589	6075
DMSO	2	9	245.328	249.404	6300
DMSO	2	9	246.143	250.219	6525
DMSO	2	9	247.774	250.219	6750
DMSO	2	9	250.219	253.479	6975
DMSO	2	9	252.664	253.479	7200
DMSO	2	9	256.739	252.664	7425
DMSO	2	9	257.554	253.479	7650
DMSO	2	9	259.184	254.294	7875
DMSO	2	9	257.554	255.109	8100
DMSO	2	9	261.629	256.739	8325
DMSO	2	9	262.444	257.554	8550
DMSO	2	9	263.259	259.184	8775
DMSO	2	9	263.259	259.999	9000
DMSO	2	9	259.184	259.184	9225
DMSO	2	9	262.444	260.814	9450
DMSO	2	9	264.074	261.629	9675
DMSO	2	9	264.889	263.259	9900
DMSO	2	9	265.704	264.889	10125
DMSO	2	9	267.335	262.444	10350
DMSO	2	9	269.78	266.52	10575
DMSO	2	9	270.595	266.52	10800
DMSO	2	10	220.877	294.231	0
DMSO	2	10	222.507	296.676	225
DMSO	2	10	222.507	295.861	450
DMSO	2	10	224.952	292.601	675
DMSO	2	10	226.582	295.046	900
DMSO	2	10	226.582	295.046	1125
DMSO	2	10	226.582	293.416	1350
DMSO	2	10	224.137	292.601	1575
DMSO	2	10	229.027	297.491	1800
DMSO	2	10	229.843	299.121	2025
DMSO	2	10	226.582	297.491	2250
DMSO	2	10	226.582	295.861	2475
DMSO	2	10	226.582	297.491	2700
DMSO	2	10	226.582	298.306	2925
DMSO	2	10	225.767	300.751	3150
DMSO	2	10	226.582	299.121	3375
DMSO	2	10	229.027	301.566	3600
DMSO	2	10	228.212	299.936	3825
DMSO	2	10	226.582	304.012	4050
DMSO	2	10	227.397	302.381	4275
DMSO	2	10	229.843	301.566	4500
DMSO	2	10	230.658	302.381	4725
DMSO	2	10	231.473	304.012	4950
DMSO	2	10	230.658	304.827	5175
DMSO	2	10	233.103	302.381	5400
DMSO	2	10	233.103	304.012	5625
DMSO	2	10	233.103	304.827	5850
DMSO	2	10	233.918	308.087	6075
DMSO	2	10	233.918	306.457	6300
DMSO	2	10	235.548	307.272	6525
DMSO	2	10	237.178	305.642	6750
DMSO	2	10	242.068	304.827	6975
DMSO	2	10	242.883	305.642	7200
DMSO	2	10	242.883	305.642	7425
DMSO	2	10	244.513	304.012	7650
DMSO	2	10	244.513	305.642	7875
DMSO	2	10	246.143	304.827	8100
DMSO	2	10	246.958	305.642	8325
DMSO	2	10	249.404	306.457	8550
DMSO	2	10	250.219	305.642	8775
DMSO	2	10	252.664	307.272	9000
DMSO	2	10	253.479	305.642	9225
DMSO	2	10	255.109	307.272	9450
DMSO	2	10	255.109	304.827	9675
DMSO	2	10	255.924	304.827	9900
DMSO	2	10	256.739	305.642	10125
DMSO	2	10	259.184	304.012	10350
DMSO	2	10	259.999	303.197	10575
DMSO	2	10	261.629	302.381	10800
DMSO	2	11	332.538	218.432	0
DMSO	2	11	329.278	217.617	225
DMSO	2	11	333.353	220.062	450
DMSO	2	11	326.018	219.247	675
DMSO	2	11	326.018	220.877	900
DMSO	2	11	324.388	227.397	1125
DMSO	2	11	321.127	223.322	1350
DMSO	2	11	317.052	227.397	1575
DMSO	2	11	314.607	227.397	1800
DMSO	2	11	312.162	229.027	2025
DMSO	2	11	308.902	231.473	2250
DMSO	2	11	306.457	230.658	2475
DMSO	2	11	304.827	231.473	2700
DMSO	2	11	304.827	236.363	2925
DMSO	2	11	303.197	237.178	3150
DMSO	2	11	303.197	237.178	3375
DMSO	2	11	298.306	240.438	3600
DMSO	2	11	300.751	238.808	3825
DMSO	2	11	302.381	239.623	4050
DMSO	2	11	304.012	238.808	4275
DMSO	2	11	302.381	237.993	4500
DMSO	2	11	302.381	243.698	4725
DMSO	2	11	301.566	244.513	4950
DMSO	2	11	301.566	245.328	5175
DMSO	2	11	301.566	244.513	5400
DMSO	2	11	297.491	244.513	5625
DMSO	2	11	296.676	245.328	5850
DMSO	2	11	295.046	243.698	6075
DMSO	2	11	294.231	246.143	6300
DMSO	2	11	291.786	247.774	6525
DMSO	2	11	289.341	250.219	6750
DMSO	2	11	290.156	250.219	6975
DMSO	2	11	290.156	251.849	7200
DMSO	2	11	287.711	250.219	7425
DMSO	2	11	286.896	253.479	7650
DMSO	2	11	289.341	253.479	7875
DMSO	2	11	290.156	255.109	8100
DMSO	2	11	290.156	254.294	8325
DMSO	2	11	290.971	255.109	8550
DMSO	2	11	290.971	254.294	8775
DMSO	2	11	288.526	255.109	9000
DMSO	2	11	286.081	256.739	9225
DMSO	2	11	285.266	256.739	9450
DMSO	2	11	283.635	256.739	9675
DMSO	2	11	285.266	258.369	9900
DMSO	2	11	286.081	260.814	10125
DMSO	2	11	288.526	261.629	10350
DMSO	2	11	289.341	259.184	10575
DMSO	2	11	290.971	259.999	10800
DMSO	2	12	327.648	279.56	0
DMSO	2	12	326.018	275.485	225
DMSO	2	12	324.388	282.005	450
DMSO	2	12	323.573	280.375	675
DMSO	2	12	317.867	279.56	900
DMSO	2	12	315.422	280.375	1125
DMSO	2	12	314.607	285.266	1350
DMSO	2	12	312.162	282.005	1575
DMSO	2	12	312.977	282.82	1800
DMSO	2	12	312.977	284.451	2025
DMSO	2	12	312.162	283.635	2250
DMSO	2	12	310.532	285.266	2475
DMSO	2	12	310.532	284.451	2700
DMSO	2	12	307.272	288.526	2925
DMSO	2	12	305.642	290.156	3150
DMSO	2	12	304.012	290.971	3375
DMSO	2	12	304.827	291.786	3600
DMSO	2	12	304.012	289.341	3825
DMSO	2	12	303.197	292.601	4050
DMSO	2	12	304.827	291.786	4275
DMSO	2	12	304.012	292.601	4500
DMSO	2	12	307.272	295.861	4725
DMSO	2	12	303.197	295.861	4950
DMSO	2	12	303.197	298.306	5175
DMSO	2	12	302.381	297.491	5400
DMSO	2	12	300.751	295.861	5625
DMSO	2	12	299.121	297.491	5850
DMSO	2	12	298.306	295.861	6075
DMSO	2	12	299.121	298.306	6300
DMSO	2	12	295.046	296.676	6525
DMSO	2	12	299.936	296.676	6750
DMSO	2	12	297.491	292.601	6975
DMSO	2	12	294.231	294.231	7200
DMSO	2	12	296.676	293.416	7425
DMSO	2	12	297.491	293.416	7650
DMSO	2	12	299.121	293.416	7875
DMSO	2	12	296.676	291.786	8100
DMSO	2	12	292.601	293.416	8325
DMSO	2	12	294.231	292.601	8550
DMSO	2	12	290.971	291.786	8775
DMSO	2	12	295.046	292.601	9000
DMSO	2	12	291.786	292.601	9225
DMSO	2	12	290.156	294.231	9450
DMSO	2	12	291.786	295.861	9675
DMSO	2	12	293.416	295.861	9900
DMSO	2	12	295.046	295.046	10125
DMSO	2	12	292.601	293.416	10350
DMSO	2	12	293.416	293.416	10575
DMSO	2	12	295.046	293.416	10800
DMSO	2	13	327.648	256.739	0
DMSO	2	13	332.538	253.479	225
DMSO	2	13	323.573	253.479	450
DMSO	2	13	320.312	252.664	675
DMSO	2	13	317.052	256.739	900
DMSO	2	13	314.607	256.739	1125
DMSO	2	13	314.607	255.109	1350
DMSO	2	13	312.162	257.554	1575
DMSO	2	13	312.162	259.184	1800
DMSO	2	13	310.532	259.999	2025
DMSO	2	13	309.717	259.999	2250
DMSO	2	13	308.902	262.444	2475
DMSO	2	13	310.532	263.259	2700
DMSO	2	13	308.087	264.074	2925
DMSO	2	13	307.272	264.074	3150
DMSO	2	13	305.642	268.965	3375
DMSO	2	13	304.012	266.52	3600
DMSO	2	13	306.457	267.335	3825
DMSO	2	13	304.827	265.704	4050
DMSO	2	13	303.197	266.52	4275
DMSO	2	13	304.012	269.78	4500
DMSO	2	13	304.827	268.15	4725
DMSO	2	13	304.012	269.78	4950
DMSO	2	13	303.197	272.225	5175
DMSO	2	13	298.306	271.41	5400
DMSO	2	13	298.306	273.04	5625
DMSO	2	13	298.306	273.04	5850
DMSO	2	13	297.491	273.04	6075
DMSO	2	13	297.491	273.04	6300
DMSO	2	13	297.491	273.855	6525
DMSO	2	13	296.676	276.3	6750
DMSO	2	13	296.676	274.67	6975
DMSO	2	13	295.046	275.485	7200
DMSO	2	13	295.861	273.855	7425
DMSO	2	13	295.046	274.67	7650
DMSO	2	13	295.046	276.3	7875
DMSO	2	13	295.046	274.67	8100
DMSO	2	13	295.046	273.04	8325
DMSO	2	13	297.491	276.3	8550
DMSO	2	13	296.676	276.3	8775
DMSO	2	13	298.306	275.485	9000
DMSO	2	13	295.046	274.67	9225
DMSO	2	13	298.306	277.115	9450
DMSO	2	13	298.306	276.3	9675
DMSO	2	13	297.491	276.3	9900
DMSO	2	13	297.491	278.745	10125
DMSO	2	13	295.046	279.56	10350
DMSO	2	13	295.046	279.56	10575
DMSO	2	13	297.491	280.375	10800
DMSO	2	14	337.428	297.491	0
DMSO	2	14	334.168	295.046	225
DMSO	2	14	333.353	294.231	450
DMSO	2	14	329.278	295.046	675
DMSO	2	14	327.648	295.861	900
DMSO	2	14	324.388	293.416	1125
DMSO	2	14	325.203	294.231	1350
DMSO	2	14	322.758	295.046	1575
DMSO	2	14	321.127	294.231	1800
DMSO	2	14	321.127	296.676	2025
DMSO	2	14	321.127	296.676	2250
DMSO	2	14	319.497	296.676	2475
DMSO	2	14	316.237	295.861	2700
DMSO	2	14	314.607	295.861	2925
DMSO	2	14	312.162	298.306	3150
DMSO	2	14	311.347	298.306	3375
DMSO	2	14	312.977	299.121	3600
DMSO	2	14	311.347	299.121	3825
DMSO	2	14	311.347	299.121	4050
DMSO	2	14	308.087	299.936	4275
DMSO	2	14	308.902	302.381	4500
DMSO	2	14	305.642	302.381	4725
DMSO	2	14	304.827	302.381	4950
DMSO	2	14	304.827	302.381	5175
DMSO	2	14	301.566	302.381	5400
DMSO	2	14	302.381	305.642	5625
DMSO	2	14	300.751	303.197	5850
DMSO	2	14	301.566	303.197	6075
DMSO	2	14	302.381	303.197	6300
DMSO	2	14	299.121	304.012	6525
DMSO	2	14	298.306	304.827	6750
DMSO	2	14	298.306	304.012	6975
DMSO	2	14	297.491	304.012	7200
DMSO	2	14	295.046	303.197	7425
DMSO	2	14	294.231	305.642	7650
DMSO	2	14	296.676	304.827	7875
DMSO	2	14	295.046	304.827	8100
DMSO	2	14	292.601	302.381	8325
DMSO	2	14	295.046	302.381	8550
DMSO	2	14	296.676	304.012	8775
DMSO	2	14	295.046	303.197	9000
DMSO	2	14	294.231	303.197	9225
DMSO	2	14	294.231	303.197	9450
DMSO	2	14	293.416	305.642	9675
DMSO	2	14	296.676	305.642	9900
DMSO	2	14	295.861	306.457	10125
DMSO	2	14	295.046	304.827	10350
DMSO	2	14	295.861	304.012	10575
DMSO	2	14	298.306	305.642	10800
DMSO	2	15	343.949	281.19	0
DMSO	2	15	341.504	279.56	225
DMSO	2	15	338.243	282.82	450
DMSO	2	15	337.428	280.375	675
DMSO	2	15	335.798	279.56	900
DMSO	2	15	333.353	281.19	1125
DMSO	2	15	332.538	285.266	1350
DMSO	2	15	328.463	286.081	1575
DMSO	2	15	326.833	286.081	1800
DMSO	2	15	325.203	286.081	2025
DMSO	2	15	325.203	286.896	2250
DMSO	2	15	324.388	284.451	2475
DMSO	2	15	322.758	286.081	2700
DMSO	2	15	322.758	286.896	2925
DMSO	2	15	321.943	285.266	3150
DMSO	2	15	320.312	286.081	3375
DMSO	2	15	319.497	287.711	3600
DMSO	2	15	316.237	287.711	3825
DMSO	2	15	315.422	288.526	4050
DMSO	2	15	312.977	289.341	4275
DMSO	2	15	312.977	289.341	4500
DMSO	2	15	312.162	290.156	4725
DMSO	2	15	311.347	289.341	4950
DMSO	2	15	312.162	290.156	5175
DMSO	2	15	310.532	291.786	5400
DMSO	2	15	312.162	292.601	5625
DMSO	2	15	311.347	291.786	5850
DMSO	2	15	310.532	290.971	6075
DMSO	2	15	312.977	291.786	6300
DMSO	2	15	311.347	291.786	6525
DMSO	2	15	311.347	292.601	6750
DMSO	2	15	310.532	292.601	6975
DMSO	2	15	311.347	291.786	7200
DMSO	2	15	309.717	292.601	7425
DMSO	2	15	311.347	292.601	7650
DMSO	2	15	311.347	293.416	7875
DMSO	2	15	308.902	295.046	8100
DMSO	2	15	308.087	293.416	8325
DMSO	2	15	309.717	292.601	8550
DMSO	2	15	308.087	295.861	8775
DMSO	2	15	308.087	295.861	9000
DMSO	2	15	307.272	295.046	9225
DMSO	2	15	307.272	295.861	9450
DMSO	2	15	308.087	295.046	9675
DMSO	2	15	308.902	295.046	9900
DMSO	2	15	307.272	293.416	10125
DMSO	2	15	308.087	298.306	10350
DMSO	2	15	307.272	296.676	10575
DMSO	2	15	307.272	294.231	10800
DMSO	2	16	334.168	233.918	0
DMSO	2	16	332.538	237.178	225
DMSO	2	16	330.908	237.178	450
DMSO	2	16	330.908	237.178	675
DMSO	2	16	329.278	237.993	900
DMSO	2	16	327.648	237.993	1125
DMSO	2	16	326.833	240.438	1350
DMSO	2	16	322.758	238.808	1575
DMSO	2	16	321.127	242.068	1800
DMSO	2	16	324.388	241.253	2025
DMSO	2	16	321.943	241.253	2250
DMSO	2	16	317.867	240.438	2475
DMSO	2	16	314.607	242.068	2700
DMSO	2	16	314.607	243.698	2925
DMSO	2	16	314.607	246.143	3150
DMSO	2	16	312.977	246.958	3375
DMSO	2	16	311.347	246.958	3600
DMSO	2	16	309.717	246.958	3825
DMSO	2	16	308.087	247.774	4050
DMSO	2	16	309.717	246.958	4275
DMSO	2	16	308.087	246.958	4500
DMSO	2	16	310.532	248.589	4725
DMSO	2	16	308.087	251.034	4950
DMSO	2	16	306.457	250.219	5175
DMSO	2	16	306.457	251.849	5400
DMSO	2	16	305.642	252.664	5625
DMSO	2	16	304.827	251.849	5850
DMSO	2	16	304.827	255.109	6075
DMSO	2	16	300.751	256.739	6300
DMSO	2	16	301.566	258.369	6525
DMSO	2	16	298.306	259.184	6750
DMSO	2	16	296.676	257.554	6975
DMSO	2	16	296.676	259.999	7200
DMSO	2	16	296.676	261.629	7425
DMSO	2	16	295.861	259.999	7650
DMSO	2	16	295.861	260.814	7875
DMSO	2	16	295.861	259.999	8100
DMSO	2	16	295.046	262.444	8325
DMSO	2	16	296.676	262.444	8550
DMSO	2	16	296.676	263.259	8775
DMSO	2	16	295.861	260.814	9000
DMSO	2	16	295.861	262.444	9225
DMSO	2	16	295.046	263.259	9450
DMSO	2	16	295.046	264.074	9675
DMSO	2	16	295.046	263.259	9900
DMSO	2	16	294.231	264.074	10125
DMSO	2	16	295.046	265.704	10350
DMSO	2	16	295.861	264.074	10575
DMSO	2	16	295.046	264.074	10800
DMSO	2	17	338.243	330.093	0
DMSO	2	17	334.168	325.203	225
DMSO	2	17	331.723	328.463	450
DMSO	2	17	331.723	328.463	675
DMSO	2	17	330.908	326.018	900
DMSO	2	17	329.278	325.203	1125
DMSO	2	17	327.648	326.833	1350
DMSO	2	17	326.833	326.018	1575
DMSO	2	17	324.388	325.203	1800
DMSO	2	17	321.127	325.203	2025
DMSO	2	17	320.312	326.833	2250
DMSO	2	17	320.312	326.833	2475
DMSO	2	17	318.682	327.648	2700
DMSO	2	17	318.682	328.463	2925
DMSO	2	17	321.127	328.463	3150
DMSO	2	17	322.758	334.168	3375
DMSO	2	17	319.497	333.353	3600
DMSO	2	17	316.237	333.353	3825
DMSO	2	17	312.977	334.983	4050
DMSO	2	17	308.902	334.983	4275
DMSO	2	17	309.717	334.983	4500
DMSO	2	17	306.457	334.983	4725
DMSO	2	17	299.121	335.798	4950
DMSO	2	17	299.936	334.168	5175
DMSO	2	17	297.491	334.983	5400
DMSO	2	17	296.676	331.723	5625
DMSO	2	17	296.676	333.353	5850
DMSO	2	17	295.861	334.168	6075
DMSO	2	17	294.231	333.353	6300
DMSO	2	17	291.786	332.538	6525
DMSO	2	17	293.416	334.983	6750
DMSO	2	17	292.601	333.353	6975
DMSO	2	17	295.046	334.168	7200
DMSO	2	17	293.416	330.908	7425
DMSO	2	17	293.416	332.538	7650
DMSO	2	17	293.416	331.723	7875
DMSO	2	17	290.156	331.723	8100
DMSO	2	17	290.971	329.278	8325
DMSO	2	17	291.786	328.463	8550
DMSO	2	17	295.046	329.278	8775
DMSO	2	17	295.046	328.463	9000
DMSO	2	17	295.046	329.278	9225
DMSO	2	17	291.786	328.463	9450
DMSO	2	17	291.786	328.463	9675
DMSO	2	17	291.786	328.463	9900
DMSO	2	17	295.046	330.093	10125
DMSO	2	17	295.046	329.278	10350
DMSO	2	17	293.416	326.833	10575
DMSO	2	17	289.341	322.758	10800
DMSO	2	18	353.729	303.197	0
DMSO	2	18	348.024	304.012	225
DMSO	2	18	344.764	304.012	450
DMSO	2	18	343.134	304.012	675
DMSO	2	18	341.504	301.566	900
DMSO	2	18	340.689	304.827	1125
DMSO	2	18	343.949	303.197	1350
DMSO	2	18	338.243	303.197	1575
DMSO	2	18	339.874	303.197	1800
DMSO	2	18	337.428	307.272	2025
DMSO	2	18	336.613	305.642	2250
DMSO	2	18	334.168	305.642	2475
DMSO	2	18	334.168	311.347	2700
DMSO	2	18	332.538	312.162	2925
DMSO	2	18	330.908	312.977	3150
DMSO	2	18	329.278	312.162	3375
DMSO	2	18	328.463	312.977	3600
DMSO	2	18	328.463	312.162	3825
DMSO	2	18	326.018	312.162	4050
DMSO	2	18	326.833	313.792	4275
DMSO	2	18	324.388	311.347	4500
DMSO	2	18	323.573	314.607	4725
DMSO	2	18	322.758	312.162	4950
DMSO	2	18	321.943	315.422	5175
DMSO	2	18	320.312	314.607	5400
DMSO	2	18	317.867	313.792	5625
DMSO	2	18	317.867	314.607	5850
DMSO	2	18	316.237	314.607	6075
DMSO	2	18	314.607	315.422	6300
DMSO	2	18	312.162	315.422	6525
DMSO	2	18	309.717	317.052	6750
DMSO	2	18	309.717	317.867	6975
DMSO	2	18	309.717	317.867	7200
DMSO	2	18	311.347	317.052	7425
DMSO	2	18	308.902	316.237	7650
DMSO	2	18	311.347	317.052	7875
DMSO	2	18	310.532	318.682	8100
DMSO	2	18	308.902	318.682	8325
DMSO	2	18	308.087	318.682	8550
DMSO	2	18	307.272	318.682	8775
DMSO	2	18	305.642	319.497	9000
DMSO	2	18	308.087	319.497	9225
DMSO	2	18	305.642	318.682	9450
DMSO	2	18	308.087	319.497	9675
DMSO	2	18	308.087	320.312	9900
DMSO	2	18	306.457	317.867	10125
DMSO	2	18	308.087	320.312	10350
DMSO	2	18	305.642	319.497	10575
DMSO	2	18	307.272	320.312	10800
DMSO	2	19	324.388	357.804	0
DMSO	2	19	323.573	354.544	225
DMSO	2	19	325.203	355.359	450
DMSO	2	19	326.018	354.544	675
DMSO	2	19	321.943	354.544	900
DMSO	2	19	324.388	356.989	1125
DMSO	2	19	319.497	356.989	1350
DMSO	2	19	319.497	359.435	1575
DMSO	2	19	321.127	361.065	1800
DMSO	2	19	322.758	361.065	2025
DMSO	2	19	321.943	361.88	2250
DMSO	2	19	324.388	365.955	2475
DMSO	2	19	318.682	364.325	2700
DMSO	2	19	314.607	363.51	2925
DMSO	2	19	316.237	364.325	3150
DMSO	2	19	321.127	363.51	3375
DMSO	2	19	320.312	359.435	3600
DMSO	2	19	320.312	357.804	3825
DMSO	2	19	321.943	359.435	4050
DMSO	2	19	315.422	357.804	4275
DMSO	2	19	309.717	356.989	4500
DMSO	2	19	308.087	356.989	4725
DMSO	2	19	305.642	357.804	4950
DMSO	2	19	304.827	356.989	5175
DMSO	2	19	304.827	354.544	5400
DMSO	2	19	303.197	355.359	5625
DMSO	2	19	298.306	352.914	5850
DMSO	2	19	296.676	352.099	6075
DMSO	2	19	297.491	351.284	6300
DMSO	2	19	298.306	353.729	6525
DMSO	2	19	297.491	352.099	6750
DMSO	2	19	295.046	351.284	6975
DMSO	2	19	294.231	352.914	7200
DMSO	2	19	295.046	354.544	7425
DMSO	2	19	295.046	352.099	7650
DMSO	2	19	294.231	351.284	7875
DMSO	2	19	291.786	351.284	8100
DMSO	2	19	290.156	350.469	8325
DMSO	2	19	290.971	351.284	8550
DMSO	2	19	288.526	349.654	8775
DMSO	2	19	289.341	349.654	9000
DMSO	2	19	289.341	348.024	9225
DMSO	2	19	286.896	345.579	9450
DMSO	2	19	287.711	345.579	9675
DMSO	2	19	286.081	344.764	9900
DMSO	2	19	286.081	344.764	10125
DMSO	2	19	288.526	348.024	10350
DMSO	2	19	288.526	345.579	10575
DMSO	2	19	286.081	343.134	10800
DMSO	2	20	349.654	341.504	0
DMSO	2	20	346.394	339.874	225
DMSO	2	20	343.134	341.504	450
DMSO	2	20	340.689	339.874	675
DMSO	2	20	340.689	338.243	900
DMSO	2	20	340.689	338.243	1125
DMSO	2	20	339.874	340.689	1350
DMSO	2	20	334.168	342.319	1575
DMSO	2	20	335.798	344.764	1800
DMSO	2	20	335.798	343.134	2025
DMSO	2	20	334.168	344.764	2250
DMSO	2	20	330.908	341.504	2475
DMSO	2	20	330.908	347.209	2700
DMSO	2	20	330.908	345.579	2925
DMSO	2	20	330.908	343.949	3150
DMSO	2	20	326.833	342.319	3375
DMSO	2	20	325.203	342.319	3600
DMSO	2	20	323.573	343.134	3825
DMSO	2	20	321.127	345.579	4050
DMSO	2	20	318.682	344.764	4275
DMSO	2	20	319.497	346.394	4500
DMSO	2	20	319.497	345.579	4725
DMSO	2	20	316.237	344.764	4950
DMSO	2	20	317.867	346.394	5175
DMSO	2	20	313.792	345.579	5400
DMSO	2	20	311.347	345.579	5625
DMSO	2	20	311.347	345.579	5850
DMSO	2	20	310.532	347.209	6075
DMSO	2	20	309.717	345.579	6300
DMSO	2	20	312.162	348.024	6525
DMSO	2	20	311.347	345.579	6750
DMSO	2	20	308.087	346.394	6975
DMSO	2	20	306.457	346.394	7200
DMSO	2	20	308.087	346.394	7425
DMSO	2	20	308.087	345.579	7650
DMSO	2	20	304.827	345.579	7875
DMSO	2	20	304.012	345.579	8100
DMSO	2	20	304.827	346.394	8325
DMSO	2	20	303.197	346.394	8550
DMSO	2	20	304.012	346.394	8775
DMSO	2	20	304.827	347.209	9000
DMSO	2	20	304.827	346.394	9225
DMSO	2	20	303.197	344.764	9450
DMSO	2	20	301.566	345.579	9675
DMSO	2	20	301.566	344.764	9900
DMSO	2	20	299.936	344.764	10125
DMSO	2	20	298.306	344.764	10350
DMSO	2	20	298.306	342.319	10575
DMSO	2	20	298.306	343.134	10800
DMSO	3	1	273.41	225.583	0
DMSO	3	1	273.41	225.583	271
DMSO	3	1	276.599	223.192	542
DMSO	3	1	278.99	224.786	813
DMSO	3	1	281.381	223.989	1084
DMSO	3	1	282.976	225.583	1355
DMSO	3	1	286.164	224.786	1626
DMSO	3	1	287.758	223.989	1897
DMSO	3	1	289.352	225.583	2168
DMSO	3	1	292.541	225.583	2439
DMSO	3	1	289.352	229.569	2710
DMSO	3	1	294.135	227.975	2981
DMSO	3	1	294.932	228.772	3252
DMSO	3	1	296.526	231.163	3523
DMSO	3	1	294.932	233.554	3794
DMSO	3	1	295.729	229.569	4065
DMSO	3	1	298.918	231.96	4336
DMSO	3	1	298.918	232.757	4607
DMSO	3	1	299.715	233.554	4878
DMSO	3	1	299.715	235.149	5149
DMSO	3	1	301.309	234.352	5420
DMSO	3	1	301.309	235.149	5691
DMSO	3	1	302.106	236.743	5962
DMSO	3	1	304.498	238.337	6233
DMSO	3	1	305.295	239.931	6504
DMSO	3	1	306.889	241.526	6775
DMSO	3	1	308.483	244.714	7046
DMSO	3	1	311.672	244.714	7317
DMSO	3	1	311.672	246.308	7588
DMSO	3	1	311.672	249.497	7859
DMSO	3	1	314.063	249.497	8130
DMSO	3	1	317.251	248.7	8401
DMSO	3	1	317.251	251.091	8672
DMSO	3	1	318.846	251.888	8943
DMSO	3	1	321.237	251.888	9214
DMSO	3	1	321.237	253.482	9485
DMSO	3	1	322.831	254.279	9756
DMSO	3	1	326.817	254.279	10027
DMSO	3	1	330.005	255.874	10298
DMSO	3	1	331.6	257.468	10569
DMSO	3	1	332.397	258.265	10840
DMSO	3	2	276.599	243.917	0
DMSO	3	2	275.802	242.323	271
DMSO	3	2	278.193	239.931	542
DMSO	3	2	278.193	242.323	813
DMSO	3	2	278.99	241.526	1084
DMSO	3	2	281.381	239.134	1355
DMSO	3	2	285.367	237.54	1626
DMSO	3	2	284.57	238.337	1897
DMSO	3	2	289.352	238.337	2168
DMSO	3	2	290.947	239.134	2439
DMSO	3	2	290.947	241.526	2710
DMSO	3	2	294.135	242.323	2981
DMSO	3	2	294.932	243.917	3252
DMSO	3	2	295.729	244.714	3523
DMSO	3	2	298.918	244.714	3794
DMSO	3	2	295.729	243.917	4065
DMSO	3	2	297.324	243.917	4336
DMSO	3	2	299.715	243.917	4607
DMSO	3	2	298.918	246.308	4878
DMSO	3	2	298.121	248.7	5149
DMSO	3	2	300.512	247.903	5420
DMSO	3	2	302.106	250.294	5691
DMSO	3	2	303.701	249.497	5962
DMSO	3	2	306.092	250.294	6233
DMSO	3	2	306.092	251.091	6504
DMSO	3	2	306.092	251.888	6775
DMSO	3	2	308.483	254.279	7046
DMSO	3	2	306.889	257.468	7317
DMSO	3	2	308.483	257.468	7588
DMSO	3	2	311.672	260.656	7859
DMSO	3	2	314.063	258.265	8130
DMSO	3	2	314.86	258.265	8401
DMSO	3	2	316.454	260.656	8672
DMSO	3	2	317.251	262.251	8943
DMSO	3	2	318.049	260.656	9214
DMSO	3	2	321.237	263.048	9485
DMSO	3	2	321.237	263.048	9756
DMSO	3	2	324.425	262.251	10027
DMSO	3	2	325.223	263.845	10298
DMSO	3	2	327.614	266.236	10569
DMSO	3	2	328.411	267.033	10840
DMSO	3	3	279.787	257.468	0
DMSO	3	3	279.787	255.874	271
DMSO	3	3	282.976	255.077	542
DMSO	3	3	279.787	255.874	813
DMSO	3	3	279.787	256.671	1084
DMSO	3	3	278.193	254.279	1355
[truncated: 6,732 more rows]
