# Supplementary material for: The myocardium utilizes a platelet-derived growth factor receptor alpha (Pdgfra)–phosphoinositide 3-kinase (PI3K) signaling cascade to steer toward the midline during zebrafish heart tube formation
Source: eLife. 2023 Nov 3;12:e85930. doi: 10.7554/eLife.85930 (PMC10651176; doi:10.7554/eLife.85930)
Supplement: Figure 4—figure supplement 1—source data 1. [file elife-85930-fig4-figsupp1-data1.xlsx]

## Sheet: Fig 4-Fig Suppl. 1C
DMSO						LY
Embryo #	Cell #	Type of protrusion	Angle			Embryo #	Cell #	Type of protrusion	Angle
1	1	Wide	56.023			1	1	Wide	86.479
1	1	Wide	113.749			1	1	Wide	80.096
1	1	Wide	58.878			1	1	Wide	82.349
1	1	Wide	101.725			1	1	Wide	227.603
1	1	Wide	301.799			1	1	Wide	127.235
1	1	Wide	321.009			1	1	Wide	53.13
1	1	Wide	334.855			1	1	Wide	47.386
1	1	Wide	300.018			1	1	Wide	138.674
1	1	Wide	207.942			1	1	Wide	330.146
1	1	Thin	140.947			1	1	Wide	313.21
1	1	Thin	52.815			1	1	Wide	90.988
1	1	Thin	163.61			1	1	Thin	132.325
1	1	Thin	136.591			1	1	Thin	112.567
1	1	Thin	52.374			1	1	Thin	116.862
1	1	Thin	152.7			1	1	Thin	157.834
1	1	Thin	171.703			1	1	Thin	61.991
1	1	Thin	104.036			1	1	Thin	3.24
1	1	Thin	129.29			1	1	Thin	119.836
1	1	Thin	154.179			1	1	Thin	33.69
1	1	Thin	128.811			1	1	Thin	125.34
1	1	Thin	135			1	1	Thin	56.535
1	1	Thin	169.592			1	1	Thin	45
1	1	Thin	338.703			1	1	Thin	142.853
1	1	Thin	29.407			1	1	Thin	56.31
1	1	Thin	77.574			1	1	Thin	188.236
1	1	Thin	39.094			1	1	Thin	15.945
1	1	Thin	78.465			1	1	Thin	78.111
1	1	Thin	90			1	1	Thin	164.438
1	1	Thin	112.443			1	1	Thin	177.337
1	1	Thin	123.69			1	1	Thin	133.21
1	1	Thin	135			1	1	Thin	114.057
1	1	Thin	98.13			1	1	Thin	146.31
1	1	Thin	290.695			1	1	Thin	143.13
1	1	Thin	180.939			1	1	Thin	193.496
1	1	Thin	79.38			1	1	Thin	159.444
1	1	Thin	275.44			1	1	Thin	43.025
1	1	Thin	343.301			1	1	Thin	98.13
1	1	Thin	26.565			1	1	Thin	99.806
1	1	Thin	242.021			1	1	Thin	193.761
1	1	Thin	250.71			1	1	Thin	12.529
1	1	Thin	299.358			1	1	Thin	145.222
1	1	Thin	288.06			1	1	Thin	150.642
1	2	Wide	271.79			1	1	Thin	168.53
1	2	Wide	247.749			1	1	Thin	107.56
1	2	Wide	45.764			1	1	Thin	167.525
1	2	Wide	229.145			1	1	Thin	122.619
1	2	Wide	213.179			1	1	Thin	328.392
1	2	Wide	229.939			1	1	Thin	304.695
1	2	Wide	203.459			1	1	Thin	281.21
1	2	Wide	214.992			1	1	Thin	307.185
1	2	Wide	220.786			1	1	Thin	317.231
1	2	Wide	222.563			1	1	Thin	176.186
1	2	Wide	16.621			1	1	Thin	189.462
1	2	Wide	310.4			1	1	Thin	162.897
1	2	Wide	216.347			1	1	Thin	278.915
1	2	Thin	129.806			1	2	Wide	327.04
1	2	Thin	151.783			1	2	Wide	133.229
1	2	Thin	146.31			1	2	Wide	149.036
1	2	Thin	135			1	2	Wide	324.926
1	2	Thin	157.286			1	2	Wide	326.853
1	2	Thin	135.69			1	2	Wide	139.514
1	2	Thin	214.33			1	2	Wide	309.699
1	2	Thin	150.884			1	2	Wide	241.468
1	2	Thin	299.358			1	2	Wide	335.923
1	2	Thin	114.9			1	2	Wide	208.072
1	2	Thin	159.605			1	2	Wide	188.653
1	2	Thin	288.997			1	2	Wide	137.603
1	2	Thin	344.846			1	2	Wide	301.159
1	2	Thin	212.307			1	2	Wide	297.474
1	2	Thin	502.667			1	2	Wide	267.614
1	2	Thin	267.207			1	2	Wide	190.954
1	2	Thin	215.838			1	2	Wide	5.631
1	2	Thin	45			1	2	Wide	276.843
1	2	Thin	98.616			1	2	Thin	175.914
1	2	Thin	137.186			1	2	Thin	29.427
1	2	Thin	315			1	2	Thin	314.421
1	2	Thin	321.789			1	2	Thin	207.553
1	3	Wide	337.068			1	2	Thin	102.804
1	3	Wide	134.433			1	2	Thin	175.236
1	3	Wide	31.122			1	2	Thin	122.229
1	3	Wide	3.18			1	2	Thin	122.735
1	3	Wide	357.93			1	2	Thin	145.244
1	3	Wide	22.166			1	2	Thin	299.745
1	3	Wide	73.856			1	2	Thin	273.945
1	3	Wide	104.589			1	2	Thin	309.806
1	3	Wide	349.992			1	2	Thin	282.529
1	3	Wide	346.759			1	2	Thin	137.045
1	3	Wide	45.939			1	2	Thin	222.51
1	3	Wide	3.334			1	2	Thin	345.53
1	3	Wide	125.38			1	2	Thin	118.78
1	3	Wide	323.696			1	2	Thin	108.122
1	3	Wide	47.675			1	2	Thin	149.036
1	3	Wide	109.477			1	2	Thin	131.379
1	3	Wide	12.057			1	2	Thin	161.147
1	3	Wide	38.454			1	2	Thin	200.854
1	3	Wide	29.11			1	2	Thin	130.601
1	3	Wide	355.236			1	2	Thin	111.161
1	3	Wide	19.134			1	2	Thin	140.389
1	3	Wide	312.879			1	2	Thin	186.789
1	3	Thin	275.751			1	2	Thin	198.435
1	3	Thin	330.461			1	2	Thin	321.667
1	3	Thin	274.764			1	3	Wide	326.929
1	3	Thin	267.274			1	3	Wide	319.028
1	3	Thin	297.3			1	3	Wide	216.87
1	3	Thin	307.147			1	3	Wide	220.236
1	3	Thin	338.587			1	3	Wide	308.418
1	3	Thin	78.486			1	3	Wide	315
1	3	Thin	255.203			1	3	Wide	222.089
1	3	Thin	82.763			1	3	Wide	306.87
1	3	Thin	119.445			1	3	Wide	311.634
1	3	Thin	255			1	3	Wide	328.782
1	3	Thin	26.854			1	3	Wide	318.24
1	3	Thin	340.88			1	3	Wide	43.919
1	3	Thin	67.109			1	3	Wide	215.942
1	3	Thin	351.254			1	3	Wide	82.235
1	3	Thin	54.13			1	3	Wide	261.347
1	3	Thin	70.821			1	3	Wide	132.436
1	3	Thin	231.203			1	3	Wide	124.624
1	3	Thin	230.315			1	3	Wide	299.055
1	3	Thin	31.357			1	3	Wide	229.764
1	3	Thin	116.834			1	3	Wide	215.538
1	3	Thin	101.889			1	3	Wide	196.557
1	3	Thin	122.638			1	3	Wide	187.574
1	3	Thin	80.811			1	3	Thin	206.565
1	3	Thin	100.081			1	3	Thin	225
2	1	Wide	29.476			1	3	Thin	198.97
2	1	Wide	99.09			1	3	Thin	176.878
2	1	Wide	356.532			1	3	Thin	210.379
2	1	Wide	7.696			1	3	Thin	258.44
2	1	Wide	24.362			1	3	Thin	86.82
2	1	Wide	17.418			1	3	Thin	17.65
2	1	Wide	1.637			1	3	Thin	356.906
2	1	Wide	43.423			1	3	Thin	313.727
2	1	Wide	41.009			1	3	Thin	334.026
2	1	Wide	110.772			1	3	Thin	219.806
2	1	Wide	40.888			1	3	Thin	291.801
2	1	Wide	14.886			1	3	Thin	283.671
2	1	Wide	318.059			1	3	Thin	188.746
2	1	Wide	33.69			1	3	Thin	218.66
2	1	Wide	322.028			1	3	Thin	240.018
2	1	Wide	338.199			1	3	Thin	327.724
2	1	Wide	44.474			1	3	Thin	354.289
2	1	Wide	48.122			1	4	Wide	308.928
2	1	Wide	40.986			1	4	Wide	335.136
2	1	Thin	24.775			1	4	Wide	140.332
2	1	Thin	168.857			1	4	Wide	131.566
2	1	Thin	113.199			1	4	Wide	254.539
2	1	Thin	97.028			1	4	Wide	321.843
2	1	Thin	107.216			1	4	Wide	248.749
2	1	Thin	303.476			1	4	Wide	237.995
2	1	Thin	17.819			1	4	Wide	223.264
2	1	Thin	104.621			1	4	Wide	327.095
2	1	Thin	43.363			1	4	Wide	18.06
2	1	Thin	61.783			1	4	Wide	1.273
2	1	Thin	17.571			1	4	Wide	161.966
2	1	Thin	12.529			1	4	Wide	75.964
2	1	Thin	40.711			1	4	Wide	132.207
2	1	Thin	25.959			1	4	Wide	135.785
2	1	Thin	313.781			1	4	Wide	49.635
2	1	Thin	30.719			1	4	Wide	37.747
2	1	Thin	56.746			1	4	Wide	177.955
2	1	Thin	55.981			1	4	Wide	221.634
2	1	Thin	51.411			1	4	Wide	42.274
2	1	Thin	45			1	4	Wide	120.411
2	1	Thin	327.225			1	4	Wide	238.449
2	1	Thin	0.385			1	4	Thin	294.193
2	1	Thin	100.204			1	4	Thin	11.944
2	1	Thin	314.582			1	4	Thin	113.305
2	1	Thin	324.09			1	4	Thin	280.008
2	1	Thin	84.806			1	4	Thin	303.407
2	1	Thin	49.399			1	4	Thin	81.703
2	1	Thin	90.818			1	4	Thin	254.055
2	1	Thin	348.69			1	4	Thin	287.969
2	1	Thin	353.83			1	4	Thin	184.399
2	1	Thin	319.343			1	4	Thin	139.764
2	1	Thin	344.338			1	4	Thin	114.228
2	1	Thin	338.523			1	4	Thin	73.465
2	1	Thin	60.69			1	4	Thin	315
2	1	Thin	31.608			1	4	Thin	338.199
2	1	Thin	35.263			1	4	Thin	125.707
2	1	Thin	299.604			1	4	Thin	147.875
2	1	Thin	43.229			1	4	Thin	182.203
2	1	Thin	330.255			1	4	Thin	203.629
2	1	Thin	72.897			2	1	Wide	44.145
2	1	Thin	31.47			2	1	Wide	92.121
2	1	Thin	54.335			2	1	Wide	133.807
2	1	Thin	332.071			2	1	Wide	79.089
2	2	Wide	73.301			2	1	Wide	62.987
2	2	Wide	329.534			2	1	Wide	18.886
2	2	Wide	315.785			2	1	Wide	109.708
2	2	Wide	13.349			2	1	Wide	136.975
2	2	Wide	330.524			2	1	Wide	30.847
2	2	Wide	324.713			2	1	Wide	95.492
2	2	Wide	298.74			2	1	Wide	91.364
2	2	Thin	312.51			2	1	Wide	43.668
2	2	Thin	32.735			2	1	Wide	128.66
2	2	Thin	41.517			2	1	Wide	89.17
2	2	Thin	26.565			2	1	Wide	158.009
2	2	Thin	304.824			2	1	Wide	139.97
2	2	Thin	26.131			2	1	Wide	122.106
2	2	Thin	329.534			2	1	Wide	133.363
2	2	Thin	322.184			2	1	Wide	137.891
2	2	Thin	36.469			2	1	Wide	180
2	2	Thin	47.603			2	1	Wide	62.281
2	2	Thin	333.75			2	1	Thin	111.991
2	2	Thin	81.973			2	1	Thin	357.709
2	2	Thin	324.382			2	1	Thin	17.65
2	2	Thin	351.314			2	1	Thin	143.13
2	2	Thin	16.074			2	1	Thin	117.553
2	2	Thin	314.341			2	1	Thin	93.652
2	2	Thin	90.764			2	1	Thin	88.191
2	2	Thin	33.69			2	1	Thin	124.919
2	2	Thin	273.504			2	1	Thin	119.673
2	2	Thin	26.841			2	1	Thin	46.975
2	2	Thin	273.18			2	1	Thin	163.54
2	2	Thin	6.419			2	1	Thin	136.975
2	2	Thin	301.921			2	1	Thin	182.045
2	2	Thin	30.069			2	1	Thin	201.038
2	2	Thin	354.56			2	1	Thin	63.435
2	2	Thin	41.845			2	1	Thin	147.68
2	2	Thin	31.781			2	1	Thin	191.482
2	2	Thin	334.68			2	1	Thin	167.391
2	2	Thin	313.746			2	1	Thin	127.972
2	2	Thin	291.251			2	1	Thin	45
2	2	Thin	262.614			2	1	Thin	117.3
2	2	Thin	294.228			2	1	Thin	60.124
2	2	Thin	348.845			2	2	Wide	14.226
2	2	Thin	337.949			2	2	Wide	293.839
2	2	Thin	317.437			2	2	Wide	147.995
2	2	Thin	318.814			2	2	Wide	5.932
2	2	Thin	323.267			2	2	Wide	289.747
2	2	Thin	325.081			2	2	Wide	255.141
2	2	Thin	302.969			2	2	Wide	31.293
2	2	Thin	39.207			2	2	Wide	263.157
2	2	Thin	322.125			2	2	Wide	34.186
2	2	Wide	341.03			2	2	Wide	54.345
2	3	Wide	327.144			2	2	Wide	11.634
2	3	Wide	327.216			2	2	Wide	266.248
2	3	Wide	332.241			2	2	Wide	296.565
2	3	Wide	10.784			2	2	Thin	207.031
2	3	Wide	318.434			2	2	Thin	231.34
2	3	Wide	309.207			2	2	Thin	152.879
2	3	Wide	347.053			2	2	Thin	258.959
2	3	Wide	337.443			2	2	Thin	292.036
2	3	Wide	345.677			2	2	Thin	187.001
2	3	Thin	357.079			2	2	Thin	73.202
2	3	Thin	348.486			2	2	Thin	267.397
2	3	Thin	337.694			2	2	Thin	42.274
2	3	Thin	272.322			2	2	Thin	70.346
2	3	Thin	326.524			2	2	Thin	284.931
2	3	Thin	358.21			2	3	Wide	157.891
2	3	Thin	321.116			2	3	Wide	313.363
2	3	Thin	344.932			2	3	Wide	14.25
2	3	Thin	14.657			2	3	Wide	353.758
2	3	Thin	340.233			2	3	Wide	206.94
2	3	Thin	326.31			2	3	Wide	175.657
2	3	Thin	3.111			2	3	Wide	46.146
2	3	Thin	296.87			2	3	Wide	167.391
2	3	Thin	297.408			2	3	Wide	73.072
2	3	Thin	341.565			2	3	Wide	173.234
2	3	Thin	329.49			2	3	Wide	84.806
2	3	Thin	320.981			2	3	Wide	56.31
2	3	Thin	13.36			2	3	Wide	9.866
2	3	Thin	349.895			2	3	Wide	93.122
2	3	Thin	7.725			2	3	Wide	73.61
2	3	Thin	2.261			2	3	Wide	325.204
2	3	Thin	325.84			2	3	Wide	207.35
2	3	Thin	0.69			2	3	Wide	61.763
2	3	Thin	313.531			2	3	Wide	197.716
2	3	Thin	348.275			2	3	Wide	131.987
3	1	Wide	21.801			2	3	Wide	79.509
3	1	Wide	301.661			2	3	Wide	81.529
3	1	Wide	304.019			2	3	Wide	240.422
3	1	Wide	9.866			2	3	Wide	74.846
3	1	Wide	312.455			2	3	Wide	20.556
3	1	Wide	34.095			2	3	Wide	20.056
3	1	Wide	62.488			2	3	Wide	210.256
3	1	Wide	90			2	3	Wide	88.668
3	1	Wide	327.011			2	3	Wide	90
3	1	Wide	73.413			2	3	Wide	207.951
3	1	Wide	311.532			2	3	Wide	212.005
3	1	Wide	43.363			2	3	Wide	207.255
3	1	Wide	81.469			2	3	Wide	191.31
3	1	Wide	312.357			2	3	Thin	35.91
3	1	Wide	68.875			2	3	Thin	94.667
3	1	Wide	297.255			2	3	Thin	181.273
3	1	Wide	76.504			2	3	Thin	138.094
3	1	Wide	152.241			2	3	Thin	144.605
3	1	Wide	320.711			2	3	Thin	353.66
3	1	Wide	327.031			2	3	Thin	125.754
3	1	Wide	317.911			2	3	Thin	0
3	1	Wide	340.665			2	3	Thin	330.832
3	1	Wide	298.706			2	3	Thin	140.08
3	1	Wide	88.755			2	3	Thin	138.93
3	1	Wide	30.069			2	3	Thin	135.909
3	1	Wide	344.846			2	3	Thin	98.616
3	1	Wide	103.707			2	3	Thin	203.025
3	1	Wide	296.98			2	3	Thin	51.71
3	1	Thin	18.8			2	3	Thin	55.146
3	1	Thin	320.964			2	3	Thin	218.991
3	1	Thin	358.34			2	3	Thin	36.444
3	1	Thin	310.462			2	3	Thin	175.764
3	1	Thin	149.237			2	4	Wide	221.923
3	1	Thin	305.91			2	4	Wide	123.495
3	1	Thin	334.502			2	4	Wide	228.013
3	1	Thin	36.254			2	4	Wide	259.077
3	1	Thin	11.201			2	4	Wide	91.219
3	1	Thin	21.038			2	4	Wide	325.426
3	1	Thin	36.87			2	4	Wide	322.549
3	1	Thin	347.125			2	4	Wide	185.29
3	1	Thin	15.611			2	4	Wide	307.405
3	1	Thin	0.924			2	4	Wide	223.919
3	1	Thin	37.208			2	4	Wide	193.092
3	1	Thin	344.982			2	4	Wide	115.201
3	1	Thin	356.186			2	4	Wide	100.305
3	1	Thin	47.07			2	4	Wide	268.363
3	1	Thin	89.012			2	4	Wide	191.592
3	1	Thin	302.4			2	4	Wide	53.746
3	1	Thin	46.685			2	4	Wide	72.801
3	1	Thin	337.109			2	4	Wide	93.366
3	1	Thin	307.405			2	4	Wide	82.093
3	1	Thin	22.782			2	4	Wide	294.538
3	1	Thin	93.366			2	4	Wide	151.39
3	1	Thin	55.981			2	4	Wide	283.325
3	1	Thin	27.013			2	4	Thin	91.302
3	1	Thin	291.571			2	4	Thin	161.565
3	1	Thin	90			2	4	Thin	82.235
3	1	Thin	340.346			2	4	Thin	43.531
3	1	Thin	280.305			2	4	Thin	98.858
3	1	Thin	69.193			2	4	Thin	31.139
3	1	Thin	42.647			2	4	Thin	106.699
3	1	Thin	75.379			2	4	Thin	140.659
3	1	Thin	254.745			2	4	Thin	91.169
3	1	Thin	36.098			2	4	Thin	73.61
3	1	Thin	338.682			2	4	Thin	236.491
3	1	Thin	301.675			2	4	Thin	130.601
3	1	Thin	357.51			2	4	Thin	141.116
3	1	Thin	341.075			2	4	Thin	126.119
3	1	Thin	112.068			2	4	Thin	134.31
3	1	Thin	83.928			2	4	Thin	99.462
3	1	Thin	95.856			2	4	Thin	81.703
3	1	Thin	92.726			2	5	Wide	73.072
4	1	Thin	14.1986			2	5	Wide	228.945
4	1	Wide	221.73			2	5	Wide	57.031
4	1	Wide	16.9661			2	5	Wide	341.94
4	1	Wide	1.9092			2	5	Wide	21.251
4	1	Wide	346.76			2	5	Wide	321.546
4	1	Wide	75.0686			2	5	Wide	62.879
4	1	Wide	349.695			2	5	Wide	144.293
4	1	Wide	26.5651			2	5	Wide	42.647
4	1	Wide	166.464			2	5	Wide	101.514
4	1	Wide	336.425			2	5	Wide	63.435
4	1	Wide	159.145			2	5	Wide	310.365
4	1	Wide	354.898			2	5	Wide	306.027
4	1	Wide	85.9144			2	5	Wide	123.69
4	1	Thin	330.086			2	5	Wide	117.848
4	1	Thin	27.1811			2	5	Wide	153.869
5	1	Wide	347.905			2	5	Wide	123.996
5	1	Thin	327.894			2	5	Wide	316.79
5	1	Wide	337.834			2	5	Wide	22.62
5	1	Wide	307.794			2	5	Wide	319.844
5	1	Wide	85.9144			2	5	Wide	338.629
5	1	Wide	335.095			2	5	Wide	31.608
5	1	Wide	71.8781			2	5	Wide	317.726
5	1	Wide	4.844			2	5	Wide	75.256
5	1	Wide	31.9081			2	5	Wide	359.061
5	1	Wide	309.806			2	5	Wide	328.627
5	1	Wide	44.2559			2	5	Wide	311.424
5	1	Wide	41.3785			2	5	Wide	228.013
5	1	Thin	111.801			2	5	Wide	91.219
5	1	Thin	80.0958			2	5	Wide	331.39
5	1	Thin	35.0958			2	5	Wide	338.199
5	1	Thin	25.3462			2	5	Wide	355.333
5	1	Wide	331.587			2	5	Wide	100.125
5	1	Thin	66.0375			2	5	Wide	144.211
5	1	Thin	53.3929			2	5	Wide	320.194
5	1	Wide	348.503			2	5	Wide	23.459
5	1	Wide	322.883			2	5	Thin	294.228
5	1	Thin	84.7099			2	5	Thin	146.634
5	1	Thin	51.5819			2	5	Thin	327.2
5	1	Wide	305.789			2	5	Thin	160.017
5	1	Thin	333.435			2	5	Thin	147.2
5	1	Thin	338.199			2	5	Thin	14.421
5	1	Thin	75.9638			2	5	Thin	102.339
5	1	Thin	62.1759			2	5	Thin	33.959
5	1	Thin	86.3478			2	5	Thin	19.335
5	1	Thin	53.9726			2	5	Thin	142.815
5	1	Wide	325.438			2	5	Thin	358.668
5	1	Wide	3.5215			2	5	Thin	2.545
5	1	Thin	58.4652			2	5	Thin	84.806
5	1	Thin	69.1455			2	5	Thin	72.646
5	2	Wide	313.636			3	1	Wide	143.13
5	2	Thin	27.4076			3	1	Wide	61.39
5	2	Thin	303.071			3	1	Wide	67.126
5	2	Thin	77.8218			3	1	Wide	42.594
5	2	Wide	84.6107			3	1	Wide	230.906
5	2	Thin	71.9395			3	1	Wide	313.363
5	2	Wide	72.7185			3	1	Wide	64.026
5	2	Thin	77.6192			3	1	Wide	216.416
5	2	Thin	61.607			3	1	Wide	66.209
5	2	Thin	45			3	1	Wide	114.567
5	2	Wide	354.92			3	1	Wide	64.204
5	2	Wide	30.6507			3	1	Wide	219.245
5	2	Wide	26.5651			3	1	Wide	56.07
5	2	Thin	38.6598			3	1	Wide	225.725
5	2	Thin	46.8476			3	1	Wide	257.074
5	2	Thin	71.0754			3	1	Wide	54.782
5	2	Wide	101.56			3	1	Wide	230.947
5	2	Wide	343.179			3	1	Wide	316.975
5	2	Wide	106.113			3	1	Wide	64.44
5	2	Thin	117.98			3	1	Wide	324.583
5	2	Thin	119.745			3	1	Wide	74.539
5	2	Thin	112.521			3	1	Wide	71.565
						3	1	Wide	70.017
						3	1	Wide	235.008
						3	1	Wide	326.634
						3	1	Wide	336.14
						3	1	Wide	209.168
						3	1	Wide	259.563
						3	1	Wide	309.936
						3	1	Wide	128.66
						3	1	Thin	244.622
						3	1	Thin	229.764
						3	1	Thin	185.782
						3	1	Thin	223.069
						3	1	Thin	187.815
						3	1	Thin	141.563
						3	1	Thin	130.721
						3	1	Thin	174.382
						3	1	Thin	199.29
						3	1	Thin	136.888
						3	1	Thin	185.793
						3	1	Thin	125.362
						3	1	Thin	130.101
						3	1	Thin	214.046
						3	1	Thin	182.726
						3	1	Thin	297.031
						4	1	Wide	38.991
						4	1	Wide	169.287
						4	1	Wide	180
						4	1	Wide	181.637
						4	1	Wide	98.13
						4	1	Wide	156.801
						4	1	Wide	137.603
						4	1	Wide	49.185
						4	1	Wide	203.199
						4	1	Wide	124.16
						4	1	Wide	225
						4	1	Wide	213.69
						4	1	Wide	192.036
						4	1	Wide	309.806
						4	1	Wide	180
						4	1	Wide	325.008
						4	1	Wide	315
						4	1	Wide	43.727
						4	1	Wide	199.983
						4	1	Wide	223.025
						4	1	Wide	41.424
						4	1	Wide	30.964
						4	1	Wide	334.29
						4	1	Wide	285.068
						4	1	Wide	4.514
						4	1	Wide	285.642
						4	1	Wide	336.038
						4	1	Wide	127.185
						4	1	Wide	198.435
						4	1	Thin	80.538
						4	1	Thin	254.578
						4	1	Thin	133.727
						4	1	Thin	203.749
						4	1	Thin	64.799
						4	1	Thin	211.218
						4	1	Thin	241.113
						4	1	Thin	187.853
						4	1	Thin	232.306
						4	1	Thin	192.095
						4	1	Thin	308.29
						4	1	Thin	208.301
						4	1	Thin	207.897
						4	1	Thin	207.759

## Sheet: Fig 4- Fig Suppl. 1D_average
	Treatment	No. of embryos	No. of cells	Total no. of protrusions	Thin protrusions %	SD	Wide protrusions %	SD		p-values: Fisher's exact test
Type of protrusions per hour	DMSO	5	11	425	58.8845	5.69901	41.1155	3.17869		3.87e-08
	LY	4	11	480	45.2188	6.00506	54.7812	3.85944

## Sheet: Fig 4- Fig Suppl. 1D_raw
Treatment	Embryo #	Cell #	No. of protrusions	Total time measured (hour)	No. of protrusions per hour	No. of thin protrusions	No. of wide protrusions	Thin protrusions/hour	Wide protrusions/hour	Thin protrusions/hour %	Wide protrusions/hour %
DMSO	1	1	42	2.1333	19.6878	33	9	15.469	4.21882	78.5714	21.4286
DMSO	1	2	35	2.1333	16.4065	22	13	10.3127	6.09385	62.8571	37.1429
DMSO	1	3	48	2.1333	22.5004	26	22	12.1877	10.3127	54.1667	45.8333
DMSO	2	1	62	2.8667	21.6277	43	19	14.9998	6.62783	69.3548	30.6452
DMSO	2	2	49	2.8667	17.0928	42	7	14.651	2.44183	85.7143	14.2857
DMSO	2	3	34	2.8667	11.8603	25	9	8.72083	3.1395	73.5294	26.4706
DMSO	3	1	72	2.1725	33.1415	44	28	20.2532	12.8884	61.1111	38.8889
DMSO	4	1	15	1.75	8.57143	3	12	1.71429	6.85714	20	80
DMSO	4	2	12	1.75	6.85714	4	8	2.28571	4.57143	33.3333	66.6667
DMSO	5	1	34	1.925	17.6623	17	17	8.83117	8.83117	50	50
DMSO	5	2	22	1.925	11.4286	13	9	6.75325	4.67532	59.0909	40.9091
20uM LY	1	1	55	2.1067	26.1072	44	11	20.8857	5.22144	80	20
20uM LY	1	2	46	2.0267	22.697	28	18	13.8156	8.88143	60.8696	39.1304
20uM LY	1	3	41	2.6133	15.689	19	22	7.2705	8.41847	46.3415	53.6585
20uM LY	1	4	41	2.6133	15.689	18	23	6.88784	8.80113	43.9024	56.0976
20uM LY	2	1	43	1.0667	40.3112	22	21	20.6244	19.6869	51.1628	48.8372
20uM LY	2	2	24	1.0667	22.4993	11	13	10.3122	12.1871	45.8333	54.1667
20uM LY	2	3	52	2.6133	19.8982	17	35	6.50519	13.393	32.6923	67.3077
20uM LY	2	4	39	2.6133	14.9237	17	22	6.50519	8.41847	43.5897	56.4103
20uM LY	2	5	50	2.6133	19.1329	14	36	5.35721	13.7757	28	72
20uM LY	3	1	46	3.22	14.2857	16	30	4.96894	9.31677	34.7826	65.2174
20uM LY	4	1	43	2.68	16.0448	13	30	4.85075	11.194	30.2326	69.7674
