# Supplementary material for: The myocardium utilizes a platelet-derived growth factor receptor alpha (Pdgfra)–phosphoinositide 3-kinase (PI3K) signaling cascade to steer toward the midline during zebrafish heart tube formation
Source: eLife. 2023 Nov 3;12:e85930. doi: 10.7554/eLife.85930 (PMC10651176; doi:10.7554/eLife.85930)
Supplement: Figure 4—source data 1. [file elife-85930-fig4-data1.xlsx]

## Sheet: Fig 4_average data
Figure 4- Statistics
		No. of embryos	No. of cells	Total no. of protrusions	Average	SD		p-values: Mann-Whitney test
Rate for protrusions per hour	DMSO	5	11	425	20.33	6.69		0.3562
	LY	4	11	480	16.99	7.427
Persistence of protrusions per cell (mins)	DMSO	5	11	425	2.302	0.6381		p-values: Two-tailed t-test
	LY	4	11	480	3.238	0.8487		0.0084
Forward direction	DMSO	5	11	425	77.2585	21.76		p-values for overall direction of migration: Fisher's exact test
	LY	4	11	480	46.0314	11.6601		1.075e-05
Backward direction	DMSO	5	11	425	22.7415	21.7613
	LY	4	11	480	53.9686	11.6601
Number of protrusions per cell	DMSO	5	11	425	38.6364	18.6187		p-values: Two-tailed t-test
	LY	5	11	480	43.6364	8.19719		0.4289

## Sheet: Fig 4_raw data
Fig. 4
Treatment	Embryo #	Cell #	No. of protrusions	Total time measured (hour)	No. of protrusions per hour	Persistence of protrusions per cell (mins)	% of forward protrusions	% of backward protrusions
DMSO	1	1	42	2.1333	19.6878	2.31111	50	50
DMSO	1	2	35	2.1333	16.4065	1.97172	27.2727	72.7273
DMSO	1	3	48	2.1333	22.5004	1.82857	70.8333	29.1667
DMSO	2	1	62	2.8667	21.6277	2.77419	85.4839	14.5161
DMSO	2	2	49	2.8667	17.0928	2.28163	95.9184	4.08163
DMSO	2	3	34	2.8667	11.8603	2.15	100	0
DMSO	3	1	72	2.1725	33.1415	3.90423	87.3239	12.6761
DMSO	4	1	15	1.75	8.57143	1.52667	80	20
DMSO	4	2	12	1.75	6.85714	1.775	75	25
DMSO	5	1	34	1.925	17.6623	2.51471	97.0588	2.94118
DMSO	5	2	22	1.925	11.4286	2.28571	80.9524	19.0476
20uM LY	1	1	55	2.1067	26.1072	4.20741	42.5926	57.4074
20uM LY	1	2	46	2.0267	22.697	3.23478	36.9565	63.0435
20uM LY	1	3	41	2.6133	15.689	2.92683	48.7805	51.2195
20uM LY	1	4	41	2.6133	15.689	2.32	45	55
20uM LY	2	1	43	1.0667	40.3112	4.13659	34.1463	65.8537
20uM LY	2	2	24	1.0667	22.4993	4.73333	66.6667	33.3333
20uM LY	2	3	52	2.6133	19.8982	3.2	48.0769	51.9231
20uM LY	2	4	39	2.6133	14.9237	3.45263	34.2105	65.7895
20uM LY	2	5	50	2.6133	19.1329	2.90612	67.3469	32.6531
20uM LY	3	1	46	3.22	14.2857	2.55111	42.2222	57.7778
20uM LY	4	1	43	2.68	16.0448	1.95349	37.2093	62.7907

## Sheet: Fig 4_angle of all protrusions 
Angle of all protrusions measured
DMSO	20uM LY
180.939	182.203
203.459	184.399
207.942	186.789
212.307	187.574
213.179	188.236
214.33	188.653
214.992	188.746
215.838	189.462
216.347	190.954
220.786	193.496
222.563	193.761
225	196.557
229.145	198.435
229.939	198.97
230.315	200.854
231.203	203.629
242.021	206.565
247.749	207.553
250.71	208.072
255.203	210.379
267.207	215.538
267.274	215.942
271.79	216.87
274.764	218.66
275.44	219.806
275.751	220.236
288.06	221.634
288.997	222.089
290.695	222.51
297.3	223.264
299.358	225
299.358	227.603
300.018	229.764
301.799	237.995
307.147	238.449
310.4	240.018
312.879	241.468
315	248.749
321.009	254.055
321.789	254.539
323.696	258.44
330.461	261.347
334.855	267.614
337.068	273.945
338.587	276.843
338.703	278.915
340.88	280.008
343.301	281.21
344.846	282.529
346.759	283.671
349.992	287.969
351.254	291.801
355.236	294.193
357.93	297.474
3.18	299.055
3.334	299.745
12.057	301.159
16.621	303.407
19.134	304.695
22.166	306.87
26.565	307.185
26.854	308.418
29.11	308.928
29.407	309.699
31.122	309.806
31.357	311.634
38.454	313.21
39.094	313.727
45	314.421
45.764	315
45.939	315
47.675	317.231
52.374	318.24
52.815	319.028
54.13	321.667
56.023	321.843
58.878	324.926
67.109	326.853
70.821	326.929
73.856	327.04
77.574	327.095
78.465	327.724
78.486	328.392
79.38	328.782
80.811	330.146
82.763	334.026
90	335.136
98.13	335.923
98.616	338.199
100.081	345.53
101.725	354.289
101.889	356.906
104.036	1.273
104.589	3.24
109.477	5.631
112.443	11.944
113.749	12.529
114.9	15.945
116.834	17.65
119.445	18.06
122.638	29.427
123.69	33.69
125.38	37.747
128.811	42.274
129.29	43.025
129.806	43.919
134.433	45
135	47.386
135	49.635
135	53.13
135.69	56.31
136.591	56.535
137.186	61.991
140.947	73.465
142.667	75.964
146.31	78.111
150.884	80.096
151.783	81.703
152.7	82.235
154.179	82.349
157.286	86.479
159.605	86.82
163.61	90.988
169.592	98.13
171.703	99.806
262.614	102.804
272.322	107.56
273.18	108.122
273.504	111.161
291.251	112.567
294.228	113.305
296.87	114.057
297.408	114.228
298.74	116.862
299.604	118.78
301.921	119.836
302.969	120.411
303.476	122.229
304.824	122.619
309.207	122.735
312.51	124.624
313.531	125.34
313.746	125.707
313.781	127.235
314.341	130.601
314.582	131.379
315.785	131.566
317.437	132.207
318.059	132.325
318.434	132.436
318.814	133.21
319.343	133.229
320.981	135.785
321.116	137.045
322.028	137.603
322.125	138.674
322.184	139.514
323.267	139.764
324.09	140.332
324.382	140.389
324.713	142.853
325.081	143.13
325.84	145.222
326.31	145.244
326.524	146.31
327.144	147.875
327.216	149.036
327.225	149.036
329.49	150.642
329.534	157.834
329.534	159.444
330.255	161.147
330.524	161.966
332.071	162.897
332.241	164.438
333.75	167.525
334.68	168.53
337.443	175.236
337.694	175.914
337.949	176.186
338.199	176.878
338.523	177.337
340.233	177.955
341.03	181.273
341.565	182.045
344.338	185.29
344.932	187.001
345.677	191.31
347.053	191.482
348.275	191.592
348.486	193.092
348.69	197.716
348.845	201.038
349.895	203.025
351.314	206.94
353.83	207.031
354.56	207.255
356.532	207.35
357.079	207.951
358.21	210.256
0.385	212.005
0.69	218.991
1.637	221.923
2.261	223.919
3.111	228.013
6.419	228.013
7.696	228.945
7.725	231.34
10.784	236.491
12.529	240.422
13.349	255.141
13.36	258.959
14.657	259.077
14.886	263.157
16.074	266.248
17.418	267.397
17.571	268.363
17.819	283.325
24.362	284.931
24.775	289.747
25.959	292.036
26.131	293.839
26.565	294.228
26.841	294.538
29.476	296.565
30.069	306.027
30.719	307.405
31.47	310.365
31.608	311.424
31.781	313.363
32.735	316.79
33.69	317.726
33.69	319.844
35.263	320.194
36.469	321.546
39.207	322.549
40.711	325.204
40.888	325.426
40.986	327.2
41.009	328.627
41.517	330.832
41.845	331.39
43.229	338.199
43.363	338.629
43.423	341.94
44.474	353.66
45	353.758
47.603	355.333
48.122	357.709
49.399	358.668
51.411	359.061
54.335	0
55.981	2.545
56.746	5.932
60.69	9.866
61.783	11.634
72.897	14.226
73.301	14.25
81.973	14.421
84.806	17.65
90.764	18.886
90.818	19.335
97.028	20.056
99.09	20.556
100.204	21.251
104.621	22.62
107.216	23.459
110.772	30.847
113.199	31.139
168.857	31.293
254.745	31.608
280.305	33.959
291.571	34.186
296.98	35.91
297.255	36.444
298.706	42.274
301.661	42.647
301.675	43.531
302.4	43.668
304.019	44.145
305.91	45
307.405	46.146
310.462	46.975
311.532	51.71
312.357	53.746
312.455	54.345
317.911	55.146
320.711	56.31
320.964	57.031
327.011	60.124
327.031	61.763
334.502	62.281
337.109	62.879
338.682	62.987
340.346	63.435
340.665	63.435
341.075	70.346
344.846	72.646
344.982	72.801
347.125	73.072
356.186	73.072
357.51	73.202
358.34	73.61
0.924	73.61
9.866	74.846
11.201	75.256
15.611	79.089
18.8	79.509
21.038	81.529
21.801	81.703
22.782	82.093
27.013	82.235
30.069	84.806
34.095	84.806
36.098	88.191
36.254	88.668
36.87	89.17
37.208	90
42.647	91.169
43.363	91.219
46.685	91.219
47.07	91.302
55.981	91.364
62.488	92.121
68.875	93.122
69.193	93.366
73.413	93.652
75.379	94.667
76.504	95.492
81.469	98.616
83.928	98.858
88.755	99.462
89.012	100.125
90	100.305
90	101.514
92.726	102.339
93.366	106.699
95.856	109.708
103.707	111.991
112.068	115.201
149.237	117.3
152.241	117.553
210.964	117.848
221.73	119.673
239.162	122.106
268.315	123.495
292.306	123.69
298.146	123.996
301.675	124.919
309.401	125.754
321.147	126.119
327.171	127.972
330.086	128.66
336.425	130.601
346.76	131.987
349.695	133.363
354.898	133.807
356.426	134.31
1.9092	135.909
3.8141	136.975
14.1986	136.975
16.9661	137.891
26.5651	138.094
27.1811	138.93
47	139.97
75.0686	140.08
85.9144	140.659
159.145	141.116
166.464	142.815
303.071	143.13
305.789	144.211
307.794	144.293
309.806	144.605
313.636	146.634
322.883	147.2
325.438	147.68
327.894	147.995
331.587	151.39
333.435	152.879
335.095	153.869
337.834	157.891
338.199	158.009
343.179	160.017
347.905	161.565
348.503	163.54
354.92	167.391
3.5215	167.391
4.844	173.234
25.3462	175.657
26.5651	175.764
27.4076	180
30.6507	182.726
31.9081	185.782
35.0958	185.793
38.6598	187.815
41.3785	199.29
44.2559	209.168
45	214.046
46.8476	216.416
51.5819	219.245
53.3929	223.069
53.9726	225.725
58.4652	229.764
61.607	230.906
62.1759	230.947
66.0375	235.008
69.1455	244.622
71.0754	257.074
71.8781	259.563
71.9395	297.031
72.7185	309.936
75.9638	313.363
77.6192	316.975
77.8218	324.583
80.0958	326.634
84.6107	336.14
84.7099	42.594
85.9144	54.782
86.3478	56.07
101.56	61.39
106.113	64.026
111.801	64.204
112.521	64.44
117.98	66.209
119.745	67.126
	70.017
	71.565
	74.539
	114.567
	125.362
	128.66
	130.101
	130.721
	136.888
	141.563
	143.13
	174.382
	38.991
	181.637
	187.853
	192.036
	192.095
	198.435
	199.983
	203.199
	203.749
	207.759
	207.897
	208.301
	211.218
	213.69
	223.025
	225
	232.306
	241.113
	254.578
	285.068
	285.642
	308.29
	309.806
	315
	325.008
	334.29
	336.038
	4.514
	30.964
	41.424
	43.727
	49.185
	64.799
	80.538
	98.13
	124.16
	127.185
	133.727
	137.603
	156.801
	169.287
	180
	180

## Sheet: Fig 4_persistence of all protr.
Persistence/min of all protrusions measured
DMSO	20uM LY
2.13333	1.6
2.13333	1.6
4.26667	1.6
1.06667	3.2
1.06667	3.2
1.06667	6.4
2.13333	1.6
1.06667	1.6
1.06667	3.2
4.26667	3.2
1.06667	1.6
5.33333	11.2
3.2	1.6
1.06667	3.2
3.2	1.6
3.2	1.6
2.13333	1.6
1.06667	3.2
3.2	1.6
4.26667	1.6
1.06667	4.8
10.6667	1.6
2.13333	3.2
2.13333	6.4
1.06667	1.6
6.4	3.2
3.2	8
1.06667	1.6
2.13333	6.4
2.13333	4.8
2.13333	1.6
2.13333	3.2
1.06667	4.8
1.06667	44.8
1.06667	3.2
1.06667	3.2
1.06667	4.8
1.06667	1.6
2.13333	1.6
1.06667	1.6
1.06667	20.8
2.13333	1.6
3.2	1.6
3.2	1.6
1.06667	6.4
1.06667	1.6
3.2	1.6
2.13333	3.2
1.06667	3.2
3.2	1.6
3.2	1.6
5.33333	3.2
3.2	4.8
1.06667	0
0	6.4
1.06667	1.6
1.06667	4.8
1.06667	3.2
5.33333	3.2
1.06667	1.6
1.06667	3.2
1.06667	1.6
1.06667	1.6
1.06667	1.6
1.06667	1.6
2.13333	3.2
2.13333	1.6
1.06667	1.6
2.13333	4.8
5.33333	3.2
1.06667	6.4
1.06667	1.6
1.06667	3.2
1.06667	4.8
1.06667	1.6
1.06667	1.6
2.13333	4.8
1.06667	4.8
2.13333	3.2
1.06667	4.8
2.13333	1.6
1.06667	3.2
1.06667	4.8
2.13333	3.2
1.06667	1.6
1.06667	9.6
2.13333	3.2
2.13333	3.2
1.06667	3.2
1.06667	3.2
2.13333	3.2
1.06667	4.8
2.13333	3.2
2.13333	3.2
3.2	4.8
3.2	1.6
1.06667	4.8
2.13333	1.6
1.06667	4.8
1.06667	3.2
1.06667	1.6
1.06667	1.6
1.06667	1.6
1.06667	1.6
1.06667	1.6
1.06667	1.6
3.2	1.6
1.06667	1.6
1.06667	1.6
17.0667	1.6
2.13333	1.6
1.06667	1.6
2.13333	1.6
1.06667	1.6
2.13333	1.6
1.06667	1.6
1.06667	1.6
2.13333	1.6
1.06667	3.2
1.06667	3.2
1.06667	3.2
1.06667	4.8
2.13333	3.2
1.06667	1.6
2.86667	1.6
4.3	1.6
1.43333	1.6
7.16667	1.6
4.3	1.6
1.43333	1.6
1.43333	1.6
1.43333	1.6
2.86667	1.6
1.43333	1.6
1.43333	3.2
4.3	3.2
1.43333	3.2
1.43333	8
2.86667	8
5.73333	9.6
2.86667	9.6
2.86667	12.8
1.43333	1.6
1.43333	1.6
1.43333	1.6
2.86667	3.2
4.3	3.2
4.3	1.6
1.43333	1.6
2.86667	1.6
1.43333	1.6
1.43333	4.8
2.86667	4.8
1.43333	1.6
4.3	1.6
1.43333	1.6
1.43333	3.2
1.43333	4.8
2.86667	1.6
2.86667	1.6
2.86667	1.6
2.86667	1.6
5.73333	0
4.3	4.8
1.43333	3.2
2.86667	1.6
2.86667	1.6
1.43333	3.2
1.43333	1.6
5.73333	1.6
2.86667	1.6
2.86667	4.8
1.43333	1.6
2.86667	3.2
1.43333	1.6
4.3	1.6
2.86667	1.6
5.73333	3.2
2.86667	1.6
7.16667	3.2
2.86667	1.6
2.86667	1.6
1.43333	1.6
1.43333	3.2
2.86667	1.6
1.43333	3.2
1.43333	1.6
1.43333	1.6
1.43333	1.6
7.16667	1.6
2.86667	16
1.43333	4.8
1.43333	1.6
1.43333	1.6
1.43333	1.6
1.43333	3.2
1.43333	3.2
1.43333	4.8
4.3	3.2
5.73333	11.2
1.43333	1.6
1.43333	1.6
2.86667	0
1.43333	3.2
1.43333	1.6
5.73333	1.6
1.43333	3.2
2.86667	1.6
1.43333	1.6
2.86667	3.2
1.43333	6.4
1.43333	3.2
4.3	1.6
2.86667	1.6
1.43333	14.4
1.43333	1.6
1.43333	8
1.43333	3.2
8.6	3.2
1.43333	4.8
4.3	9.6
1.43333	8
1.43333	8
1.43333	6.4
1.43333	4.8
1.43333	0
2.86667	1.6
2.86667	1.6
1.43333	1.6
1.43333	1.6
2.86667	3.2
1.43333	3.2
1.43333	1.6
1.43333	8
1.43333	1.6
2.86667	1.6
1.43333	1.6
1.43333	3.2
1.43333	1.6
1.43333	11.2
1.43333	35.2
1.43333	4.8
1.43333	4.8
2.86667	1.6
4.3	8
1.43333	3.2
4.3	4.8
1.43333	3.2
1.43333	3.2
1.43333	1.6
1.43333	1.6
1.43333	1.6
1.43333	1.6
1.43333	1.6
2.86667	1.6
5.73333	3.2
1.43333	1.6
1.43333	4.8
2.86667	3.2
2.86667	6.4
2.86667	3.2
4.3	1.6
1.43333	1.6
2.86667	1.6
1.43333	1.6
1.43333	1.6
1.43333	1.6
2.86667	1.6
1.43333	3.2
1.65	3.2
1.65	1.6
3.3	1.6
6.6	1.6
3.3	1.6
4.95	1.6
3.3	1.6
1.65	1.6
6.6	1.6
4.95	3.2
18.15	3.2
3.3	1.6
6.6	6.4
1.65	1.6
4.95	1.6
3.3	1.6
3.3	16
1.65	1.6
6.6	3.2
1.65	1.6
1.65	1.6
1.65	1.6
9.9	4.8
1.65	4.8
1.65	8
1.65	1.6
0	1.6
28.05	3.2
1.65	1.6
3.3	3.2
3.3	6.4
1.65	1.6
8.25	24
1.65	1.6
3.3	1.6
1.65	4.8
4.95	1.6
3.3	3.2
1.65	4.8
1.65	1.6
6.6	9.6
1.65	3.2
6.6	1.6
1.65	1.6
3.3	3.2
3.3	1.6
3.3	1.6
1.65	1.6
4.95	1.6
3.3	6.4
3.3	9.6
1.65	3.2
1.65	1.6
4.95	0
3.3	1.6
4.95	12.8
1.65	4.8
3.3	4.8
4.95	4.8
1.65	1.6
3.3	1.6
13.2	1.6
3.3	4.8
3.3	3.2
3.3	3.2
1.65	3.2
1.65	1.6
1.65	1.6
1.65	1.6
1.65	3.2
1.65	3.2
1.65	6.4
1.8	1.6
1.8	1.6
1.8	3.2
3.6	1.6
1.8	4.8
1.8	1.6
1.8	4.8
1.7	3.2
0.85	6.4
0.85	1.6
0.85	1.6
1.7	1.6
0.85	1.6
0.85	1.6
0.85	1.6
1.8	1.6
3.6	1.6
3.6	1.6
1.8	3.2
1.8	3.2
1.8	1.6
1.8	1.6
0.85	1.6
0.85	1.6
0.85	11.2
0.85	3.2
1.7	1.6
1.5	1.6
3	3.2
1.5	1.6
3	1.6
1.5	1.6
1.5	1.6
7.5	6.4
1.5	1.6
4.5	1.6
4.5	1.6
1.5	4.8
6	3.2
4.5	11.2
3	3.2
3	1.6
1.5	4.8
1.5	1.6
3	9.6
3	3.2
1.5	1.6
1.5	1.6
1.5	1.6
1.5	1.4
1.5	2.8
1.5	1.4
1.5	1.4
1.5	1.4
3	1.4
4.5	2.8
3	1.4
1.5	2.8
1.5	7
1.5	1.4
1.5	2.8
3	1.4
1.5	1.4
1.5	1.4
1.5	1.4
1.5	2.8
1.5	1.4
1.5	1.4
4.5	1.4
1.5	1.4
3	1.4
3	1.4
4.5	1.4
1.5	1.4
3	1.4
1.5	1.4
1.5	4.2
6	1.4
1.5	5.6
1.5	0
1.5	7
1.5	4.2
	2.8
	2.8
	1.4
	5.6
	1.4
	2.8
	2.8
	7
	2.8
	4.2
	2.8
	4.2
	1.4
	1.33333
	1.33333
	1.33333
	1.33333
	9.33333
	2.66667
	2.66667
	1.33333
	4
	2.66667
	1.33333
	1.33333
	1.33333
	1.33333
	1.33333
	1.33333
	1.33333
	1.33333
	2.66667
	5.33333
	1.33333
	1.33333
	1.33333
	1.33333
	1.33333
	1.33333
	1.33333
	1.33333
	1.33333
	1.33333
	1.33333
	2.66667
	1.33333
	1.33333
	4
	1.33333
	2.66667
	2.66667
	1.33333
	1.33333
	1.33333
	1.33333
	1.33333
