# Supplementary material for: The myocardium utilizes a platelet-derived growth factor receptor alpha (Pdgfra)–phosphoinositide 3-kinase (PI3K) signaling cascade to steer toward the midline during zebrafish heart tube formation
Source: eLife. 2023 Nov 3;12:e85930. doi: 10.7554/eLife.85930 (PMC10651176; doi:10.7554/eLife.85930)
Supplement: Figure 5—source data 1. [file elife-85930-fig5-data1.xlsx]

## Sheet: Fig 5A_average_all replicates
Figure 5A
Genotype	Total no. of replicates	Average pAkt/Akt	SEM		p-values: One-way ANOVA
WT	3	1	0		WT-ref hets	0.033
ref hets	3	0.660161	0.11		WT-ref hom	0.002
ref hom	3	0.22268	0.25

## Sheet: Fig5A_raw data_each replicate
Fig. 5A
Genotype	Replicate #	pAkt/Akt
WT	1	1
WT	2	1
WT	3	1
ref hets	1	0.580296
ref hets	2	0.740025
ref hets	3	0.650034
ref hom	1	0.505172
ref hom	2	0.138326
ref hom	3	0.0245416

## Sheet: Fig 5B_average_all replicates
Figure 5B
Genotype	Total no. of replicates	Average pAkt/Akt	SEM		p-values: Student's T-test
HAAM-	3	1	0		HAAM- -- HAAM+	0.0153
HAAM+	3	5.62148	0.5

## Sheet: Fig5B_raw data_each replicate
Fig. 5B
Genotype	Replicate #	pAkt/Akt
HAAM-	1	1
HAAM-	2	1
HAAM-	3	1
HAAM+	1	2.43144
HAAM+	2	4.67534
HAAM+	3	9.75767

## Sheet: Fig5F_average_all replicates
Figure 5F
Treatment; Genotype	Total number of embryos	Average Cardiac ring %	Cardiac ring SEM	Average Posterior fusion %	Posterior fusion SEM	Average Cardia bifida %	Cardia bifida SEM		p-values: ONE-WAY ANOVA
DMSO +/+	47	100	0	0	0	0	0		DMSO; +/+ - DMSO; -/+	1
DMSO -/+	25	100	0	0	0	0	0		DMSO; +/+ - 10LY; +/+	0.109865
10LY +/+	36	89.1026	7.39267	10.8974	7.39267	0	0		DMSO; +/+ - 10LY; -/+	0.000803
10LY-/+	31	0	0	34.8318	11.4458	65.1682	11.4458		10LY; +/+ - 10LY; -/+	0.018713

## Sheet: Fig5F_raw data_each replicate
Fig. 5F
Treatment; Genotype	Replicate #	No. of embryos	Cardiac ring %	Posterior fusion %	Cardia bifida %
DMSO +/+	1	8	100	0	0
DMSO +/+	2	24	100	0	0
DMSO +/+	3	15	100	0	0
DMSO -/+	1	7	100	0	0
DMSO -/+	2	5	100	0	0
DMSO -/+	3	13	100	0	0
10LY +/+	1	8	75	25	0
10LY +/+	2	15	100	0	0
10LY +/+	3	13	92.3077	7.69231	0
10LY -/+	1	7	0	14.2857	85.7143
10LY -/+	2	11	0	36.3636	63.6364
10LY -/+	3	13	0	53.8462	46.1538

## Sheet: Fig 5J_average_all replicates
Figure 5J
Treatment; Genotype	Total number of embryos	Average Cardiac ring %	Cardiac ring SEM	Average Posterior fusion %	Posterior fusion SEM	Average Cardia bifida %	Cardia bifida SEM		p-values: ONE-WAY ANOVA
DMSO; +/+	49	97.4359	2.567	2.5641	2.567	0	0		DMSO +/+ - DMSO HAAM+	0.0028262
DMSO; hs:pdgfaa	57	44.14	10.055	47.083	4.653	8.77193	8.77		DMSO +/+ - 10uM LY +/+	0.964673
10uM LY; +/+	51	92.8571	7.133	7.14286	7.133	0	0		DMSO +/+ - 10uM LY HAAM +	0.4869
10uM LY; hs:pdgfaa	57	82.7973	5.932	17.2027	5.932	0	0		DMSO HAAM + - 10uM LY +/+	0.0049297
									DMSO HAAM + - 10uM LY HAAM +	0.0183966
									10uM LY +/+ - 10uM LY HAAM +	0.742213

## Sheet: Fig 5J_raw data_each replicate
Figure 5J
Treatment; Genotype	Replicate #	No. of embryos	Cardiac ring %	Posterior fusion %	Cardia bifida %
DMSO; +/+	1	13	92.3077	7.69231	0
DMSO; +/+	2	18	100	0	0
DMSO; +/+	3	18	100	0	0
DMSO; hs:pdgfaa	1	19	26.3158	47.3684	26.3158
DMSO; hs:pdgfaa	2	20	45	55	0
DMSO; hs:pdgfaa	3	18	61.1111	38.8889	0
10uM LY; +/+	1	14	78.5714	21.4286	0
10uM LY; +/+	2	18	100	0	0
10uM LY; +/+	3	19	100	0	0
10uM LY; hs:pdgfaa	1	20	75	25	0
10uM LY; hs:pdgfaa	2	18	94.4444	5.55556	0
10uM LY; hs:pdgfaa	3	19	78.9474	21.0526	0
